# Supplementary material for: A review of Euryoryzomys legatus (Rodentia, Sigmodontinae): morphological redescription, cytogenetics, and molecular phylogeny
Source: PeerJ. 2020 Oct 29;8:e9884. doi: 10.7717/peerj.9884 (PMC7603791; doi:10.7717/peerj.9884)
Supplement: Supplemental Information 15 [file peerj-08-9884-s015.xlsx]

## Sheet: Raw Data
Species	Voucher	Sex	TL	T	HF	E	W	AGE	CIL	DL	PB	MTRL	BLLT	IFL	AW1	ZB	ZP	BB	IOC	RW2	RL	OL	OCW	ML
E. legatus	CEM3986	M	277	153	34	23	70	3	31.04	9	7.25	5	4.15	4.93	5.95	17.34	4.52	12.17	5.81	6.41	13.23	11.3	7.11	18.15
E. legatus	CEM4110	M	286	162	34	23	81	3	32.09	9.3	7.54	5.34		5.32	6.01	17.91	4.48	12.38	5.88	6.54		12.57	7.3	19.17
E. legatus	CEM4259	F	278	146	33	24		3	30.62	8.96	6.92	5	4.39	5.21	6.02	16.45	4.36	12.68	5.8	6.36	13.13	11.06	6.96	18.14
E. legatus	CEM4290	M	265	134	32	23	57	3	30.31	8.82	7.15	5.12	4.16	4.86	6.15	16.62	4.48	12.39	5.48	6.03	13.39	11.09	6.86
E. legatus	CEM4304	F	268	145	31	23	56	3	30.57	9.03	7.37	5.03	4.13	5.32	6.21	17.06	4.57	12.53	5.72	6.17	13.78	11.57	7.18	18.5
E. legatus	CEM5864	F	273	146	31	23		2	30.67	8.67	7.18	5.2	4.25	4.85	6.14	15.71	4.59	12.53	5.7	6.38	13	11.5	7.1	18.34
E. legatus	CJC2182	M	238	123	30	18	45	2	27.51	8.04	6.7	5.21	4.23	4.41	5.9	15.92	3.63	12.19	5.5	6.04	11.87	10.36	7.1	16.93
E. legatus	CJC2202	F	242	134	32.1	25.2	37	2	27.33	7.61	6.6	5.15	4.08	4.62	6.04	15.52	3.73	12.15	5.89	5.68	12	10.39	6.86	16.62
E. legatus	CML11598	M	240	125	31	22	37	1	27.51	7.17	6.48	5.11	3.91	4.49	6.06	15.79	3.68	13.05	5.6	5.92	11.64	10.27	6.96	15.71
E. legatus	CML11602	M	292	132	31	24	75	4	33.11	9.27	7.37	5.3	4.37	5.3	6.61	18.34	4.33	13.97	5.9	7.09	14.47	11.58	7.51	18.48
E. legatus	CML11603	M	271	138	31	24	53	1	29.79	7.62	6.7	5.4	4.42	5.12	6.36	17.35	4.3	13.66	5.87	6.36	12.91	11.24	7.25	16.82
E. legatus	CML12383	M	282	141	32	23	70	2	31.58	8.48	7.03	5.14	4.05	5.32	6.32	18.27	4.82	13.44	5.77	6.77	13.53	11.92	7.01	17.43
E. legatus	CML13250	H	280	145	34	24	71	3	31.42	8.54	7.28	5.22	4.03	5.01	6.5	17.95	4.64	13.76	5.87	6.59	13.73	11.79	7.2	17.47
E. legatus	CML13251	M	295	153	37	25	71	2	31.99	8.9	7.37	5.16	4.14	4.97	6.46	18.42	4.86	13.87	6.1	6.98	14.24	11.94	7.3	17.64
E. legatus	CML13252	H	200	122	33		54	1.5	28.6	7.3	6.66	4.86	4.1	4.55	5.71	16.34	3.61	13.1	5.44	5.81	11.74	10.7	7.01	16.05
E. legatus	CML13253	H	274	148	34	23	56	1.5	30.63	8	7.06	5.3	4.09	4.87	5.77	16.48	3.91	12.77	5.41	6.18	12.95	11.22	7.09	17.44
E. legatus	CML13254	M	227	118	32	21	42	1	26.42	6.9	6.65	5.18	3.96	4.26	5.72	14.79	3.38	13.07	5.66	5.67	10.94	9.72	6.8	15.43
E. legatus	CML13255	M	304	155	35	24	90	4.5	33.26	9.5	7.41	5.37	4.29	5.64	6.82	19.24	4.67	13.7	5.75	7.56	14.63	12.37	7.7	19.13
E. legatus	CML13256	M	267	128	36	24	85	1.5	30.94	8.54	7.09	5.13	4.21	5.24	6.11	17.49	4.41	13.9	5.7	6.48	13.26	11.58	7.2	17.23
E. legatus	CML13257	M	269	142	36	23	55	1.5	29.26	7.74	6.59	4.83	4	4.98	5.99	16.75	4.01	14.08	5.84	5.9	12.28	11.01	7.39	16.92
E. legatus	CML13258	H	255	135	35	23	47	1.5	29.93	7.97	6.83	5.15	3.97	4.82	6.1	17.1	4.34	13.24	5.69	6.33	13.29	11.22	7	17.32
E. legatus	CML13259	M	265	139	35	24	49.5	1.5	30	7.94	6.87	5.11	3.79	4.85	6.05	16.93	4.16	13.36	5.8	6.42	13.12	10.9	7.1	12.15
E. legatus	CML13260	H	225	112	30	21	36	1	25.56	6.53	6	4.93	3.43	4.19	5.6	14.83	3.01	12.91	5.39	5.5	10.44	9.95	6.42	15.11
E. legatus	CML13261	H	305	149	34	25	96.5	4	32.83	9.11	7.73	5.15	4.44	5.2	6.48	18.23	4.67	14.08	5.69	6.62	14.12	11.97	7.53	19.06
E. legatus	CML13262	M	274	141	35	23	61	3	30.54	8.23	6.77	5.18	4.06	5.06	6.25	17.55	3.94	13.9	5.78	6.32	13.34	11.4	7.3	17.42
E. legatus	CML13263	M	205	118	33	22	53	2.5	29.3	7.36	6.6	5.1	4	4.39	5.96	16.6	3.96	13.5	5.55	5.85	12.37	11.15	6.99	16.9
E. legatus	CML13264	H	262	138	33	23	52	3	29.79	8	6.83	4.87	3.83	5.12	6.2	17.09	4.28	13.59	5.57	6.15	13.06	11.19	6.78	17.27
E. legatus	CML13265	M	281	145	35	23	57	4	30.45	8.2	6.93	4.77	3.93	4.87	6.06	17.57	4.33	13.57	5.71	6.33	13.31	11.51	6.87	17.4
E. legatus	CML13266	H	190	95	29	21	28	0.5	24.09	6.13	5.71	4.93	3.79	3.95	5.75	14.19	2.5	12.62	5.22	4.95	9.87	9.14	6.65	13.99
E. legatus	CML13267	H	340	155	35	25	90	5	32.06	8.61	6.75	5.21	4.37	5.58	6.65	18.4	4.45	13.59	5.95	6.85	13.54	11.8	7.41	18.4
E. legatus	CML13268	H	180	85	29	20	23	0.5	23.51	6.01	5.8	5.1	3.94	4.17	5.42	13.99	2.8	12.35	5.37	4.68	9.38	9.36	6.6	13.96
E. legatus	CML13269	M	302	149	36	26	92.5	5	32.95	9.35	7.25	5.1	4.03	5.58	6.22	19.46	4.54	13.59	5.7	7.06	14	11.83	7.24	18.6
E. legatus	CML13270	H	289	149	35	24	64.5	2	31.9	8.42	6.96	5.19	4.48	5.31	6.26	17.65	4.25	13.5	5.91	6.57	13.75	11.53	7.4	18.35
E. legatus	CML13271	M	222	108	22	23	43	1.5	27.97	7.04	6.53	5.21	4.12	4.61	5.94	16.11	3.5	13.15	5.52	5.89	11.61	10.45	7.2	16.4
E. legatus	CML13272	H	293	149	34	25	72	3	32.1	8.54	7.06	5.21	4.23	5.15	6.39	18.19	4.5	13.31	5.43	6.53	13.94	11.71	7.17	18.24
E. legatus	CML13273	M	265	135	34	22	57.5	1.5	30.06	8.01	6.83	5.05	4	4.95	6.1	17	3.93	13.74	5.63	6.21	12.55	11.38	7.39	17.23
E. legatus	CML13274	H	272	137	35	24	58	2.5	31.24	8.72	6.9	5	3.8	5.24	6.02	17.8	4.54	13.74	5.56	6.28	13.54	11.66	7	17.66
E. legatus	CML13275	M	271	136	36	25	62.5	2	31.21	8.23	7.02	5.18	4.47	5.1	6.4	17.83	4.48	13.8	5.83	6.47	13.64	11.43	7.6	17.95
E. legatus	CML13276	M	256	121	34	23	52	2.5	29.85	7.83	6.55	5.12	3.89	4.91	6.11	16.73	4.17	13.17	5.59	6.1	12.53	10.93	7.19	16.89
E. legatus	CML13277	M	294	154	36	25	78.5	4	31.75	8.86	7.21	5.11	4.06	5.01	6.39	18.23	4.4	14.01	5.95	6.6	13.84	11.92	7.37	18.06
E. legatus	CML2013	M	294	147	31	24.7	62	3	30.71	8.74	6.86	5.08	4.09	4.9	6.44	17.68	4.9	13.14	5.91	6.74	13.54	11.8	7.05	18.8
E. legatus	CML2014	M	308	162	32.8	24.1	81	3	32.34	9.28	7.53	5.44	4.23	5.3	6.48	18.41	4.96	13.13	6.13	7.13	14.54	11.78	7.46	19.49
E. legatus	CML290	M	261	139	34	24	55
E. legatus	CML2938	M	295	153	35	29	75	1	31.83	8.68	7.24	5.22	4.3	5.04	6.59	18.21	4.83	13.8	6.19	7	13.86	12.19	7.33	18.12
E. legatus	CML4327	M	293	152	34	25	75.5	3	32.69	9.25	7.53	5.37	4.06	5.62	6.47	18.7	4.73	13.41	5.99	6.67	14.68	12.25	7.32	18.22
E. legatus	CML48	F	278	146	33	24
E. legatus	CML5518	H	267	142	34	23.1	63	2.5	31.12	8.4	7.1	5.29	4.33	5.25	6.25	17.9	4.58	13.83	5.79	6.33	13.7	11.87	7.06	18.12
E. legatus	CML5525	M	299	165	35	27		2	33.06	8.97	7.64	5.12	4.15	5.49	6.35	19.14	4.94	14.2	5.97	7.02	14.51	12.36	7.26	18.61
E. legatus	CML5528	H	254	133	31	22		2	30.13	7.91	6.73	5.18	4.12	4.96	6.22	17.28	4.58	13.33	5.77	6.31	13.3	11.26	7.02	17.12
E. legatus	CML8326	M	(297	(149	36	24	80	2	33.7	9.48	7.59	5.37	4.14	5.48	6.7	19.14	5	14.09	6.26	7.28	14.65	12.34	7.66	19
E. legatus	CML8327	M	284	140	33	23	73	2.5	32.41	8.98	7.48	5.08	4.36	5.18	6.24	18.57	4.99	13.76	5.97	6.9	13.97	12.54	7.18	18.65
E. legatus	CML8328	H	237	139	32	24	52	2.5	31.05	8.43	7.08	5.09	4.1	5.13	6.36	17.84	4.1	13.42	5.62	6.48	13.75	11.8	7.15	18.02
E. legatus	CML8329	H	280	145	32	23	66	2	30.75	8.36	7.38	5.37	4.43	4.69	6.56	18.05	4.39	13.85	6.26	6.39	13.24	11.56	7.3	17.03
E. legatus	CML8330	M	243	131	32	22	53	1.5	30.34	8.03	7.06	5.18	4.08	4.76	6.25	17.61	4.73	13.45	5.8	6.35	13.05	10.99	7.07	17.26
E. legatus	CML8334	H	299	150	30	26	64	5	32.84	8.99	7.34	5.24	4.32	5.53	6.54	18.29	4.54	13.92	5.77	7.47	14.28	12.04	7.27	18.44
E. legatus	CML8335	M	305	148	35	26	70	2	32.67	9.12	7.43	5.14	4.09	5.13	6.36	18.44	4.62	13.78	6.04	6.84	13.91	12.12	7.13	18.41
E. legatus	CML8336	H	274	148	33	22	55.5	1	30.11	8.11	6.83	5.09	4.06	4.73	6.39	17.53	4.44	13.77	5.84	6.29	13.33	11.16	7.34	17.4
E. legatus	CML8507	H	275	141	33.5	25.6	55	1	30.61	8.47	7.13	5.17	4.37	4.99	6.15	16.79	4.28	13.63	5.88	6.27	13.69	11.18	7.28	17.03
E. legatus	CML9349	H	215	116	30.5	20.7	27	1	27.26	7.11	6.46	5.14	4.14	4.5	5.97	15.9	3.95	13.28	5.76	6.03	11.86	10.2	6.97	15.54
E. legatus	CML9350	M	184	99.5	27.5	29	29.5	0.5	24.37	6.54	5.98	5.25	3.93	4.21	5.67	14.91	3.02	13.32	5.84	5.54	10.39	9.48	6.75	14.53
E. legatus	CML9351	M	217	117	32	21.7	47	1	27.4	7.22	6.59	5.29	4.1	4.59	6.1	16.38	3.91	13.45	5.96	6.04	11.95	10.32	7.2	15.73
E. legatus	CML9352	M	238	118	28	21	48	1	29.84	7.92	6.83	5.13	4.13	4.73	5.75	17.08	4.38	13.27	5.84	6.39	13.12	11.21	7.19	17.07
E. legatus	CML9684	M	291	145	30	25	65	3		8.82	7.25	5.11	4.34	5.38	6.36	17.8	4.67	13.6	5.84	6.58	14.31	11.59		17.78
E. legatus	CML9685	H	275	143	34	26	66	1.5	31.53	8.32	7.45	5.1	4.01	4.85	6.34	17.92	4.72	13.58	5.56	6.57	13.75	11.75	7.43	17.64
E. legatus	CML9688	H	270	135	31.5	23.3	53	1.5		8.34	7.19	5.06	4	4.74	6.06	16.9	4.27	13.38	5.77	6.04	13.14	11.04		17.01
E. legatus	CML9689	M	269	145	32.4	20.8	48.5	1	29.67	8.25	7.15	5.14	4.26	4.78	6.04	16.56	4.43	13.22	5.99	6.34	10.92	10.9	7.09	17.22
E. legatus	CML9690	M	290	155	36	24.3	79	4	33.39	9.37	7.11	5.55		5.66	6.7	19.01	5.13	14.06	6.04	7.13	14.43	12.3	7.43	18.7
E. legatus	CML9691	H	304	150	35	25	65	3.5	32.49	9.13	7.52	5.24	4.26	5.36	6.38	18.62	4.5	14.06	5.98	6.76	14.24	12.52	7.45	18.94
E. legatus	CML9692	H	290	153	35	23	77	1	31.35	8.49	6.89	5.3	4	5.01	6.41	17.98	4.66	13.85			13.68	11.55	7.26	18.11
E. legatus	CML9693	M	220	110	31	21	32.5	1	26.83	7.15	6.5	5.13	3.94	4.48	5.93	15.35	3.46	12.85	5.67	5.79	11.75	10.02	6.97	15.54
E. legatus	CML9694	M	(272	(128	34	24	78	1.5	31.75	8.55	7.09	5.13	4.01	5.58	6.11	17.7	4.64	13.87	5.65	6.8	13.88	12.07	7.33	18.1
E. legatus	CML9695	M	315	158	35	25	86	3	33.14	9.32	7.64	5.37	4.27	5.15	6.4	19.09	4.64	13.43	5.81	7.38	14.29	12.4	7.52	18.44
E. legatus	CML9696	H						1	28.69	7.36	6.75	5.36	4.29	4.53	6.04	16.08	3.46	13.64	5.61	6.15	11.63	10.83	7.36	16.14
E. legatus	CML9697	M	270	144	34	21	67	1	30.07	8.25	6.83	5.14	4.14	4.83	6.04	17.51	4.04	14.35	5.97	6.51	13.19	11.4	7.22	17.2
E. legatus	CML9698	M	270	137	32	25	71	2	31.47	8.54	7.23	5.19	4.37	4.95	6.49	17.17	4.44	13.59	5.92	6.64		11.01	7.29	17.77
E. legatus	CML9699	M	300	156	34	27	80	2.5	33	9.2	7.35	5.29	4.24	5.85	6.47	18.36	4.66	14.03	6.02	6.95	14.42	12.32	7.55	18.79
E. legatus	CML9700	M	203	114	30	22	30	0.5	25.25	6.84	6.12	4.15	3.98	4.34	5.66	15.11	3.03	13.14	5.59	5.75		9.73	7.1	15.41
E. legatus	CML9701	H	299	151	30	26	72	3	33	9.18	7.67	5.22	4.23	5.19	6.48	18.23	4.75	13.66	5.52	6.75	14.3	12.26	7.25	18.9
E. legatus	CML9703	M	278	140	37	23	56	1.5	31.73	8.64	7.44	5.18	4.2	5.38	6.26	17.97	4.71	13.75	5.9	6.64	13.8	12.03	7.21	18.6
E. legatus	CML9704	M	257	132	32	22	47	1	30.19	7.85	6.96	5.3	4.38	4.49	6.06	17.18	4.11	13.27	5.66	6.14	13.08	11.12	7.17	16.84
E. legatus	CML9705	H	296	148	34	24	80	2	31.91	8.75	7.54	5.26	4.19	5.16	6.44	17.78	4.46	13.74	5.91	6.61	14.24	11.52	7.27	18
E. legatus	CML9706							1.5	30.39	8.32	6.98	5.17	4.13	5.02	6.28	17.19	4.33	13.67	5.74	5.96	13.21	11.31	7.14	17.57
E. legatus	CML9707	H	290	145	34	23	77	2	31.81	8.62	7.26	5.07	4.31	5.27	6.33	18.13	4.62	13.36	5.79	6.48	13.9	12.01	7.38	18.14
E. legatus	CML9708	M	300	150	45	22	85	2	32.96	9.25	7.38	5.39	4.17	5.24	6.19	18.7	4.95	13.76	5.94	7.38	14.98	12.35	7.47	18.79
E. legatus	CML9709	H	240	126	30	24	50	1	29.68	7.94	6.59	5.15	4.23	4.98	6.02	16.66	4.39	13.21	5.96	6.32	13.05	11.21	7.04	16.76
E. legatus	CML9710	M	280	143	35	24	82	2	33.35	9.37	7.28	5.31	4.33	5.29	6.31	19.17	4.76	13.76	6.06	7.12	14.47	12.35	7.48	18.8
E. legatus	CML9711	M	265	134	32	22	62	1	31.08	8.42	7.02	4.99	4.2	5.03	6.28	17.7	4.7	13.58	6.23	6.66	13.33	11.71	7.12	17.51
E. legatus	CML9712	M	251	113	32	21	74	1.5	32.31	8.98	7.35	5.14	4.25	4.93	6.28	18.19	4.62	13.69	6.29	7.15	14.41	11.89	7.65	18.39
E. legatus	CML9714	H	300	155	33	25	77	2.5	32.42	8.97	7.28	5.19	4.21	5.36	6.43	18.3	4.88	14.25	6.21	6.99	14.48	11.8	7.4	18.26
E. legatus	CML9715	M	300	158	35	27	88.5	1.5	33.17	8.95	7.6	5.45	4.31	5.1	6.57	19.23	5.27	14.02	6.2	7.35	14.86	12.15	7.44	19.14
E. legatus	CML9717	M	266	145	33	23	65	2	31.34	8.61	7.39	5.26	4.33	5.09	6.37	18.15	4.61	13.79	6.51	6.56	13.49	11.54	7.45	17.71
E. legatus	CRILAR275	H	258	129	35	24	57	2.5	30.15	8.33	6.6	5	4	5.24	6.32	17.59	4.2	13.61	5.8	6.43	13.01	11.35	7.28	17.49
E. legatus	CRILAR276	M	289	149	36	24	71	2	31.76	8.33	6.89	5.13	4.22	5.29	6.14	17.87	4.34	13.41	5.93	6.26	13.44	11.91	7.34	18
E. legatus	CRILAR277	M	287	147	36	24	66	3.5	31.3	8.37	7.31	5.13	4.22	4.99	6.33	17.23	4.28	13.83	5.8	6.41	13.54	11.69	7.25	17.82
E. legatus	CRILAR278	H	294)	134)	36		90	5	33.6	9.33	7.3	5.23	4.06	5.39	6.31	18.47	4.44	13.31	5.53	6.73	14.77	12.12	7.41	19.27
E. legatus	CRILAR279	H	291	150	35	25	68	3	31.3	8.31	7.21	5.04	3.95	5.01	6.23	17.93	4.6	13.4	5.5	6.44	14.25	11.89	7.06	17.89
E. legatus	CRILAR280	M	291	148	36	24	74	4.5	31.93	8.69	7.23	5.02	4.19	5.2	6.11	18.47	4.35	13.36	5.57	6.91	13.57	11.77	7.32	18.42
E. legatus	MACN17853	M	268	146	31.5	22		2		8.59	6.68	5.1		5.32	5.96	15.53	4.21	11.89	5.86	5.92	12.9	11.52		18.13
E. legatus	MACN17856	M	283	152	33	26
E. legatus	MACN17857	M	269	131	32	23
E. legatus	MACN17858	F	286	147	33	28
E. legatus	MACN17859	F	284	146	31	22	70	3		9.06		5.28		5.51	6.54		4.53		5.86	6.32	13.59			17.73
E. legatus	MACN26337	M	214	103	32	21	35.5	1	26.15	6.72	6.24	4.91	3.63	4.09	5.6	14.98	3.1	13	5.41	5.44	10.94	9.87	6.82	15.58
E. legatus	MACN26338	M	280	151	36	23	64	1.5	29.79	7.87	6.9	5.17	3.99	4.71	5.97	16.11	3.76	13	5.71	6.11	12.71	11.1	7.11	17.1
E. legatus	MACN26339	M	239	125	31	22	41	1.5	27.94	7.33	6.8	5.06	4.32	4.7	5.93	15.99	3.71	13	5.53	5.53	11.64	10.63	6.83	16.41
E. legatus	MACN26340	H	272	143	36	24	56	2	30.37	8.4	6.99	5.06	3.93	5	6.15	17.37	4.3	13.58	5.53	6.34	13.12	11.31	7.06	17.56
E. legatus	MACN26341	H	259	127	33	23	55	2	30.5	8.08	7.06	5.12	4.13	4.77	6.17	17.24	4.2	13.82	5.5	5.98	12.84	11.33	6.95	17.1
E. legatus	MACN26342	M	304	159	37	25	88	2.5	33.47	9	7.71	5.44	4.71	5.11	6.53	18.99	4.93	13.49	5.95	7.11	14.65	12.35	7.49	18.65
E. legatus	MACN26343	H	289	148	35	25	71	3.5	31.97	8.93	7.24	4.77	3.88	5.45	6.15	18.14	4.76	13.53	5.79	6.63	13.84	11.85	7.2	18.4
E. legatus	MACN26344	M	296	159	36	23	71	3	32.46	8.85	7.36	5.1	4.12	5.1	6.34	17.99	4.4	13.54	5.62	6.67	14.24	11.82	7.09	18.47
E. legatus	MACN26345	H	265	135	33	23	54	2.5	29.15	7.97	6.97	5.1	3.62	4.86	6.06	17	3.96	13.05	5.64	5.95	12.74	11	7.12	17.18
E. legatus	MACN26346	M	295	146	36	24	89	3.5	32.04	8.03	7.23	5.12	4.3	5.23	6.35	18.59	4.67	14.15	6.15	6.75	13.97	11.89	7.58	18.55
E. legatus	MACN26347	M	294	153	35	24	79	3	31.99	8.86	7.11	4.92	4.32	5.3	6.33	18.03	4.27	13.53	5.7	6.54	13.5	11.85	7.2	18.22
E. legatus	MACN26348	H	292	159	35	25	75.5	4	31.89	8.84	6.75	5.11	4.03	5.53	6.42	18.21	4.53	13.8	5.57	6.69	13.9	11.84	7.11	18.2
E. legatus	MACN26349	M						5	32.79	9.19	7.53	5.07	4.02	5.21	6.34	18.35	4.2	13.35	5.9	6.87	14.24	11.85	7.26	18.6
E. legatus	MACN26350	H	303	155	36	25	93	3.5	32.7	9.03	7.48	5.11	4.5	5.19	6.49	18.17	4.26	13.68	5.68	6.82	14.05	11.89	7.46	19.06
E. legatus	MACN26351	H	284	142	35	23	70.5	2.5	31.31	8.43	6.95	5.25	4.24	5.4	6.23	18.24	4.16	14.03	5.61	6.24	13.75	12.03	7.33	18
E. legatus	MACN26352	M	317	161	35	25	83	4.5	33	9.23	7.47	4.89	4.05	5.35	6.16	19.15	4.53	13.6	5.75	6.93		12.35	7.21	18.74
E. legatus	MACN26353	H	207	104	30	20	31	0.5	24.8	6.5	6.22	5.1	3.95	3.99	5.52	14.28	2.84	12.79	5.32	5.34	10.32	9.17	6.55	14.84
E. legatus	MACN26354	H	156)	66)	28	20	23	0.5	22.75	5.92	5.95	5.1	3.61	3.75	5.45	13.46	2.4	11.83	5.08	4.64	9.13	8.8	6.06	13.21
E. legatus	MACN26355	M	254	131	35	22	51	1	28.22	7.24	6.42	5.16	3.9	4.5	5.82	16.18	3.74	13.34	5.72	5.88	11.78	10.68	6.88	16.38
E. legatus	MACN26356	H	242	125	30	22	38.5	1	27.96	7.56	6.54	5.16	3.8	4.52	5.94	15.46	3.44	13.12	5.92	5.54	11.78	10.4	6.92	16.58
E. legatus	MACN26357	M	265	141	34	23	49	1.5	30.58	8.38	7.14	5.1	4.08	4.98	6.16	17.4	4.28	14.34	5.8	6.26	12.86	11.2	7.24	17.4
E. legatus	MACN27066	M	273	136	35	22	58	1.5	30.01	7.99	7.07	5	4.3	4.65	6.03	17.27	4.11	14	5.42	6.26	13.07	11.68	7.33	17.89
E. legatus	MACN27067	M	208	105	31	20	29	0.5	24.71	6.53	5.96	5.03	3.97	4.17	5.76	14.89	2.56	13	5.37	5.32	10.01	9.51	6.89	14.72
E. legatus	MACN27068	M	259	138	34	23	52	1	29.35	7.65	6.86	5.24	4.11	4.6	5.97	16.29	3.63	13.47	5.63	6.1	12.49	10.91	6.91	17.05
E. legatus	MACN27069	M	275	148	36	23	56	1.5	31.41	8.41	7.13	5.2	4.25	5.1	6.25	17.9	4.61	13.39	5.71	6.18	13.63	11.55	7.39	18.07
E. legatus	MACN27070	H	216	106	32	22	35	1.5	26.63	6.63	6.17	5.3	3.91	4.31	5.92	15.63	3.31	13	5.57	5.94	11.42	9.79	6.98	15.55
E. legatus	MACN28143	M						1	27.94	7.22	6.61	5.31	4.18	4.54	6.04	16.32	3.76	13.41	5.64	6.01	11.84	10.41	7.23	16.1
E. legatus	MACN29258	M	300	154	36	25	80	2.5	31.67	8.41	7.36	5.18	4.4	4.81	6.19	17.87	4.6	13.4	5.9	6.4	13.91	11.79	7.14	18.07
E. legatus	MACN29259	M	299	150	35	26	75	3.5	32.71	9.28	7.55	5.13	4.35	5.24	6.46	19.19	4.67	13.86	5.7	6.57	13.74	12.43	7.32	18.8
E. legatus	MACN29260	M	405	155	37	25	102	4	33.79	9.41	7.9	5.17	4.27	5.33	6.37	18.89	4.91	13.85	5.86	7.21	14.3	12.34	7.36	19.13
E. legatus	MACN30.286	F	299	150	31.7	24.6		3	32.88	9.62	7.4	5.2	4.41	5.2	6.61	18.3	4.83	13.37	6.28	6.59	14.71	12.19	7.37	19.65
E. legatus	MACN30.287	M	313	155	35.7	24.9		3	32.98	9.25	7.81	5.41	4.28	5.41	6.66	18.26	4.78	13.29	6.25	6.87	14.54	12.47	7.71	19.73
E. legatus	MACN30.324	M						3	31.65	9.35	7	5.19	4.24	5.28	6.61	17.03	4.42	12.82	6	6.52	13.95	11.79	7.08	18.02
E. legatus	MACN30.325	F						4		9.11	6.86	5.26		5.17	6.36	17.31	4.39	12.11	5.83	5.54	13.63	11.64		18.63
E. legatus	MSB63359	M	258	134	33	24	50	3	29.17	8.17	6.24	5.03	3.99	5.01	6.28	17.44	4.15	12.14	5.61	6.1	12.47	10.93	6.8	18.45
E. legatus	MSB63360	M	297	152	34	26	78	3	32.75	9.1	7.35	5.3	4.38	5.84	6.58	18.62	5.22	12.83	6	7.02	14.35	11.91	7.54	19.5
E. legatus	MSB63584	F	276	139	34	25	63	3	31.94	9.09	6.97	5.33	4.26	5.86	6.48	17.72	4.9	12.22	5.73	6.73	14.28	11.61	6.99	19.12
E. legatus	MSB67318	M	300	159	30	25	61	3	31.2	8.88	7.05	5.12	4.12	5.2	6.54	18.04	4.99	12.86	5.75	6.49	13.9	11.93	7.05	18.93
E. legatus	MSB67319	F	238	127	32	21	38	2	28.02	7.83	6.57	4.95	3.83	4.71	6.18	16.19	4.07	12.27	5.6	5.76	12.13	10.79	6.9	17.04
E. legatus	MSB67320	M			35	21	60	3	30.81	8.56	7.29	5.42	4.02	4.94	6.43	17.52	4.55	12.33	5.69	6.45	13.12	11.76	7.03	18.28
E. legatus	MSB67358	M						3	32.27	9.07	7.42	5.17	4.02	5.03	6.36	17.92	4.69	12.95	5.57	6.25	14.23	12.09		19.03
E. legatus	MSB67359	M						3	31.1	8.56	7.24	5.11	4.07	5.09	6.11	17.34	4.4	12.55	5.64	6.37	13.65	11.73	6.95	18.53
E. nitidus	MZUSP27150	M	302	160	34	24	78	3	30.63	9.47	6.79	4.75	4.05	5.28	6.52	17.28	4.34	12.33	5.33	6.83	13.75	11	6.82	17.7
E. nitidus	LSUMZ12333	F	259	134	33	22	87	2	29.32	8.51	6.49	4.9	3.96	5.45	5.89	16.16	3.98	11.93	5.19	5.77	12.85	10.93	6.42	16.75
E. nitidus	LSUMZ12334	M	232	111	32	22	50	1	27.19	7.79	6.34	5.11	3.8	4.82	5.94	15.02	3.61	11.91	4.73	5.56	11.23	10.49	6.65	16.18
E. nitidus	LSUMZ12335	M	263	128	33	22	80	5	31.06	9.03	6.68	4.9	3.72	5.24	6.21	17.16	4.55	12.43	5.28	6.62	13.44	11.25	7.04	18.11
E. nitidus	LSUMZ12336	F	145		31	22	83	4	31.65	9.34	7.04	4.86	3.99	5.92	6.46	17.72	4.67	12.67	5.23	6.91	13.77	11.87	6.67	18.59
E. nitidus	LSUMZ12338	M	263	128	31	21	65	3	28.82	8.53	6.94	4.88	3.76	6.23	6.21	16.54	4.37	12.11	5.31	6.12	12.62	11.27	7.16	17.29
E. nitidus	LSUMZ12339	M	131		31	22	67	3	29.84	8.61	6.82	5.15	3.65	5.65	6.06	16.76	3.59	12.1	5.14	6.28	12.96	10.99	6.35	17.86
E. nitidus	LSUMZ12340	M	238	115	32	21	55	2	29.19	8.87	6.49	5.09	3.88	5.78	5.88	15.6	3.81	11.65	4.92	5.44	12.13	11.56	6.8	17.52
E. nitidus	LSUMZ12341	F	280	132	33	21	99	3	31.68	9.38	6.98	5.11	3.93	5.68	6.51	17.92	4.71	12.9		6.82	13.73	11.9	7.23	19.68
E. nitidus	LSUMZ12342	F	264	132	32	21	61	3	29.13	8.01	6.52	4.96	3.79	5.2	5.88	16.69	4.46	12.17	5.03	5.69	12.05	11.3	6.68	17.7
E. nitidus	LSUMZ12343	F	139		32	21	79	2	29.88	8.43	6.6	4.92	3.92	5.68	5.98	16.28	4.54	12.26	5.36	5.63	12.71	11.36	6.78	17.92
E. nitidus	LSUMZ12344	M	224	111	31	21	35	1	25.75	7.31	5.85	5.13	3.68	5.12	5.57	14.17	3.53	11.21	5.16	5.5	11.06	9.8	6.39	15.76
E. nitidus	LSUMZ12345	M	200	102	31	20	29	0.5	24.29	6.82	5.62	4.16	3.65	4.75	5.72	14.34	2.92	11.67	4.95	5.44	10.21	9.84	6.96	14.54
E. nitidus	LSUMZ12346	M	194	94	29	20	40	1	24.9	7.21	5.83	5.04	3.72	4.7	5.62	14.32	3.02	11.58	5.14	5.29	9.98	10.07	6.68	14.98
E. nitidus	LSUMZ12347	M	183	87	29	19	35	0.5	23.26	6.78	5.65	4.96	3.49	3.83	5.59	13.88	2.55	10.97	5.2	4.93	9.78	9.3	6.28	14.39
E. nitidus	LSUMZ12413	M	143		32	21	70	2	30.71	9.02	7.22	5.05	4.14	5.44	6.11	16.49	4.27	12.2	4.97	6.07	13.11	11.71	6.75	17.66
E. nitidus	LSUMZ12414	M	179	89	29	20	24	0.5	23.02	6.51	5.85	4.87	3.51	3.81	5.46	13.36	2.45	11.01	4.91	4.94	9.99	8.98	6.43	15
E. nitidus	LSUMZ14356	F	256	126	32	19	82	2	29.06	8.49	6.5	5.18	3.69	5.55	6.22	16.95	4.05	12.42	5.24	5.86	12.62	11.2	6.98
E. nitidus	LSUMZ14357	M	287	142	35	22	55	3	32.26	9.68	7	5.05	3.57	5.66	6.22		4.52	12.52	5.24	6.8	13.69	11.92	7.29	18.81
E. nitidus	LSUMZ14365	M	256	123	32	21	62	3	30.69	9.01	6.98	5.05	3.92	5.74	6.45	17.75	4.24	13.13	5.64	6.53	13.17	11.95	6.93	18.06
E. nitidus	LSUMZ16662	M	290	147	34	25	97	3	31.73	9.47	7.38	5.29	4.08	5.78	6.75	18.04	4.41	13.01	5.41	6.92	13.83	11.67	7.66	19.52
E. nitidus	LSUMZ16663	M			34	24	70	3	30.68	9.09	7.35	5.15	4.04	5	6.45	16.49	4.01	11.87	5.06	6.41	13.52	10.84	7.29	18.18
E. nitidus	LSUMZ16665	M	314	160	36	26	102	3	32.98	9.55	7.45	5.03	4.15	5.8	6.72	17.66	4.43	13.12	5.31	6.51	14.25	11.98	7.15	19.12
E. nitidus	LSUMZ16690	F	130		31	22	68	3	30.17	8.68	6.5	5.24	3.82	5.29	6.25	16.99	4.34	12.38	5.04	6.05	12.75	11.4	6.97	18.14
E. nitidus	LSUMZ16691	F	128		29	20	50	2	27.44	7.7	6.26	4.93	3.68	4.91		15.28	3.8	11.35	4.88	5.49	11.91	10.65	6.63	16.4
E. nitidus	LSUMZ16693	F	252	132	32	23	52	2	29.14	8.66	7.38	5.17	3.8	5.15	6.28	15.84	3.55	12.44	5.34	5.79	12.4	10.42	7.08	17.67
E. nitidus	LSUMZ16694	M	98		29	19	22	0.5	23.01	6.51	5.75	4.01	3.39	4.27	5.09		2.68	11.46	4.85	4.98	9.55	9.65	6.38	14.7
E. nitidus	LSUMZ19276	M	270	136	34.5	21	83	3	32.23	10.19	7.45	5.02	4.13	5.03	6.33		3.96	12.09	5.15	6.42	14.39	11.62	7.2	18.18
E. nitidus	LSUMZ19280	F	270	139	34	20	60	2	29.7	8.74	6.96	4.84	3.58	4.95	6.18	16.63	3.96	12.08	5.32	6.08	12.99	10.92	7.09	17.35
E. nitidus	MNFS1147	M	260	134	33	23	60	2	31.14	9.22	6.49	5.05	3.85	5.85	6.3	16.99	4.22	12.87	5.6	6.89	13.61	11.21	6.84	18.08
E. nitidus	MNFS1223	F	282	133	34	22	88	3	31.55	9.3	6.76	4.81	3.51	5.82	6.32	17.38	4.43	12.8	5.07	6.58	13.75	12.15	6.71	18.96
E. nitidus	MNFS1309	M	204	105	33	18	46.5	2	26.92	7.78	6.3	5.08	3.69	5.18	5.68	14.66	3.21	11.55	5.05	5.29	11.44	10.2	6.61	14.98
E. nitidus	MNFS1419	M	293	150	36	23	81	3	31.64	9.6	7.35	4.73	3.82	5.21	6.24	17.64	4.64	12.69	5.15	6.64	13.82	11.98	7.2	18.96
E. nitidus	MNFS1420	F	172	83	28	19	21	0.5	22.31	6.33	5.44	3.89	3.42	4.21	5.6	13.05	2.27	10.95	5.28	5.02	9.27	8.93	6.27	13.09
E. nitidus	MPEG10609		140		32	20	80	4	31.51	9.49	6.95	5.18	3.76	5.8	6.71	18.34	4.83	12.76	5.2	6.73	13.85	12.06	6.94	18.79
E. nitidus	MPEG770	M	225	115	32	19		2	27.47	7.47	6.03	4.8	3.89	4.61	5.66		3.69	11.74	5	6.36	11.77	10.54	7	16.7
E. nitidus	MPEG771		263	134	30	21		3	31.1	8.93	6.55	5.04	3.58	5.55	6.36	17.42	4.84	12.59	5.56	6.59	13.4	11.24	6.89	18.53
E. nitidus	MSB56050	F	237	122	29	20	37.5	2	27.16	8.22	5.66	4.52	3.77	5.33	5.67	15.44	3.57	11.84	5.03	5.68	10.98	10.3	6.54	16.58
E. nitidus	MSB56056	F	286	142	31	21	72	3	30.05	8.79	7.25	5	3.67	5.86	5.93	16.04	4.44	11.86	4.82	6.51	13.51	11.27	6.56	18.42
E. nitidus	MSB56057	F	288	138	32	23	84	3	31.77	9.15	7.31	5.08	3.92	5.64	5.96	17.21	4.49	12.6	5.13	6.14	13.24	11.94	6.88	18.3
E. nitidus	MSB57116	M	275	134	31	21	70	4	30.22	8.73	6.41	4.73	3.55	5.57	6.51	17.37	4.2	12.25	5.18	6.68	12.69	10.91	6.99	18.18
E. nitidus	MSB57117	F	274	137	30	21	74	3	29.67	8.73		4.83	3.79	5.62	6.15	16.5	4.01	12.16	5.65	6.08	12.77	11.05	6.76	17.65
E. nitidus	MSB57168	F	146		34	22	85	4	31.46	9.26		4.79	3.85	6.28	6.33	16.69	4.3	12.19	5.23	6.29	13.19	11.96	7.15	18.68
E. nitidus	MSB57169	M	293	146	35	22	76	3	30.15	8.43	6.21	5.06	3.58	6.09	6.21	17.14	4.84	12.63	5.17	6.41	13.02	11.25	6.99	18.09
E. nitidus	MSB57353	M						4	30.89	9.15	7.04	4.86	3.79	5.47	6.08	17.46	4.19	12.24	4.89	6.88	13.12	11.69	7.16	19.04
E. nitidus	MSB57354	M						3	28.55	8.52	6.28	4.66	3.81	5.38	5.92	15.92	4.02	11.64	4.83	5.96	12.08	11.18	6.61	17.17
E. nitidus	MSB68448	M	254	126	28	20	57	2	28.9	8.35	6.78	4.9	3.87	5.25	5.81	15.72	4.18	11.86	5	5.86	12.03	10.94	6.83	16.6
E. nitidus	MSB68449	M	253	124	29	21	67	2	30.11	8.79	6.45	4.87	3.85	5.19	6.12	15.93	4.08	11.94	5.03	6.26	12.41	11.6	6.87	16.95
E. nitidus	MVZ136573	M						2	28.37	8.33	6.44	5.07	3.93	5.16	5.96	15.64	3.68	12.01	4.91	5.72	12.05	10.88	6.58	17.23
E. nitidus	MVZ136574	F	269	131	33	21	82	2	30.47	8.69	6.55	4.86	3.86	5.65	6.27	16.78	3.84	12.24	5.06	6.49	13.22	11.67	6.85	17.1
E. nitidus	MVZ136576	M	273	129	32	23	90	3	31.59	9.49	7.1	4.95	3.7	5.74	6.33	17.02	4.76	12.47	5.64	6.94	13.91	12.18	7.12	18.65
E. nitidus	MVZ136578	F	138		36	23	65	3	29.97	8.74		5.01	3.7		6.27	16.66	4	12.23	5.23	6.03	13.08	11.29	7.23	18.2
E. nitidus	MVZ136588	M	148		33	21	63	3	31.91	9.74	7.13	4.94	3.64	5.89	6.06	18.14	4.2	12.96	5.62	6.73	13.85	11.81	6.97	18.26
E. nitidus	MVZ136616	F	97		27	19	16	0.5	23.2	6.61	5.34	5.07	3.02	4.49	5.71	13.49	2.78	10.9	4.75	4.88	9.54	9.05	6.53	14.34
E. nitidus	MVZ166028	M	139		31	23	77	3	30.72	8.9	6.68	5	3.5	6.12	6.3	17.18	4.44	12.34	5.44	6.74	13.52	11.83	6.74	18.05
E. nitidus	MVZ168961	M	159		33	23	90	2	31.93	8.98	7.52	5.26	3.59	5.21	6.3	17.84	4.49	12.87	5.21	6.58	13.7	11.91	6.99	18.61
E. nitidus	MVZ168962	F	264	127	32	21	54	2	28.96	8.37	6.86	4.92	3.83	5.17	5.79	16.34	4.32	12.38	4.92	5.85	12.4	11.26	6.62	17.14
E. nitidus	AMNH262024	M	228	112	33	18	50	2	26.85	7.78	5.73	4.86	3.63	5.67	5.76	14.56	3.37	11.31	5.31	5.35	11.59	10.02	6.24	16.16
E. nitidus	AMNH262026	M	280	145	34	21	69	2	30.06	8.75	6.77	5.04	3.92	5.51	6.08	15.78	4.12	12.11	5.26	6.21	13.2	11.2	7.33	17.55
E. nitidus	AMNH262028	F	228	113	29	19	40	1	26.62	7.5	5.99	5.17	3.87	4.88	5.72	14.23	3.34	11.27	5.18	5.11	11.39	10.29	6.65	16.04
E. nitidus	AMNH262033	F	230	114	32	21	34	2	26.55	7.8	5.68	4.9	3.87	5.06	5.52	13.56	3.04	11.5	5.33	5.2	11.28	9.11	6.67	14.87
E. nitidus	AMNH262036		271	142	32	17	52	4	31.47	9.18	6.68	5	4	5.81	6.35	16.62	4.6	12.25	5.56	5.98	13.65	11.53	6.93	19.26
E. nitidus	CEM6493							2	28.92	8.32	6.93	4.87	4.27	5.23	6.09	15.26	4.56	12.28	5.27	6.41	11.96	10.7	6.85	17.06
E. nitidus	MSB55328	M	269	134	32	20	60	3	29.11	8.74	6.52	4.67	3.8	4.87	5.94	16.03	3.9	12.37	5.17	5.88	12.48	10.69	6.66	17.48
E. nitidus	MSB55329	F	271	131	32	21	61	3	28.55	8.51	5.86	4.75	3.54	5.13	5.95	15.54	3.91	11.71	4.94	5.92	12.3	10.81	6.68	16.88
E. nitidus	MSB55330	M	285	145	31	21		3	30.27	9.25	6.61	4.7	4.04	5.28	5.8	16.59	4.26	11.91	5.12	6.06	13.09	11.36	6.94	17.51
E. nitidus	MSB55331	M	273	133	33	21	50	2	28.11	8.51	6.43	4.62	3.79	5.27	5.336	15.7	3.75	12.15	5.3	6.08	11.76	10.56	6.29	16.8
E. nitidus	MSB55332	M	276	141	34	21	56	3	29.13	8.56	6.25	4.67	3.46	5.69	5.73	15.9	3.85	11.85	4.96	5.7	11.64	11.04	6.71	16.29
E. nitidus	MSB55333	F	255	129	32	25	66	3	29.52	8.72	6.3	4.65	3.94	5.93	5.43	16.56	4.15	11.92	5.13	6.04	11.92	11.1	6.27	17.29
E. nitidus	MSB55334	M	271	150	33	24	75	3	30.71	9.58	6.7	4.43	4.08	5.67	6.19	16.13	3.89	12.33	4.95	6.43	12.64	11.41	6.79	18.71
E. nitidus	MSB55335	F	278	141	29	23	68	4	30.88	9	6.32	4.82	4	4.79	6.14	16.18	4.29	11.88	4.91	6.05	12.98	11.74	6.84	18.3
E. nitidus	MSB55336	F	250	131	31	26	63	4	31.03	9.48	6.21	4.77	4.03	5.83	6.1	16.51	4.29	12.4	5.06	6.33	13.2	11.9	7.04	17.91
E. nitidus	MSB55337	M	260	126	30	22	63	4	29.64	8.94	6.48	4.88	4.02	5.42	6.29	16.52	3.84	11.65	4.86	6.56	12.71	11.06	6.96	16.85
E. nitidus	MSB55338	M	280	143	31	23	78	4	30.11	9.03	6.24	4.76	3.78	5.74	6.04	17.07	4.55	12.26	5.17	6.44	12.7	11.62	6.52	17.51
E. nitidus	MSB55339	F						3	29.5	8.7	6.07	4.72	4.47	5.42	6.08	16.5	4.51	12.45	5.35	5.8	12.9	10.97	7.1	18.14
E. nitidus	MSB56062	M						4	30.98	9.32	6.29	4.87	3.51	5.72	6.06	17.56	5.04	12.51	5.34	6.81	13.22	11.65	7.3	17.83
E. nitidus	MSB56063	F	289	153	31	22		4	30.73			4.82		6.13	6.03	16.11	4.77	12.15	5.48	6.31	13.17	11.04	7.02	18.46
E. nitidus	MSB56064	F	266	132	30	22	63	3	30.17	8.24	6.25	5.15	3.87	5.08	6.22	16.3	4.85	12.46	5.45	6.27	12.15	11.18	6.91	17.35
E. nitidus	MSB56065	M	229	115	28	19	33	1	26.62	8.02	6.26	4.58	3.74	4.7	5.27	13.46	3.78	11.03	4.85	4.94	11.5	9.46	6.13	15.94
E. nitidus	MSB56066	M	260	131	31	20	50	2	29.06	8.22	6.08	4.81	3.83	5.3	6.18	16.37	4.15	12.35	5.17	6.48	12.33	11.11	6.65	17.03
E. nitidus	MSB56067	M	290	142	31	23	69	4	31.46	9.87	7.04	4.59	4.72	5.69	6.23	16.43	4.85	12.09	4.76	6.42	14.18	11.71	6.56	18.62
E. nitidus	MSB56068	M	295	154	34	25	77	3	31.14	9.69	6.84	4.83	4.16	6.01	6.55	16.49	4.56	13.11	5.43	6.87	13.38	11.76	6.86	18.67
E. nitidus	MSB56069	M	254	128	33	22	50	2	27.41	8.45	5.91	4.86	3.89	5.71	5.82	14.73	3.65	11.4	5.12	5.62	11.41	10.37	6.71	16.58
E. nitidus	MSB56070	M			31	21	68	2	29.66	9.03	6.16	4.93	4.09	5.76	6.4	15.98	4.09	12.07	5.29	5.92	12.66	10.84	6.74	17.83
E. nitidus	MSB56071	F	236	115	27	20	47	1	26.98	8.37	5.81		3.69	5.57	5.16	14.91	3.84	11.59	5.26	5.52	10.97	10.42	6.55	16.77
E. nitidus	MSB56073	M	286	143	31	23	69	3	30.5	8.99	6.23	4.88	4.02	5.62	5.98	17.5	3.99	12.64	5.05	6.68	12.49	11.6	6.88	18.1
E. nitidus	MSB56360	M					52	2	28.16	8.14	5.72	4.82	3.86	5.34	5.66	14.57	3.54	11.72	5.37	5.74	12.13	10.81	6.75	16.6
E. nitidus	MSB56362	M						3	30.59	8.66	6.7	4.81	3.65	5.66	6.21	16.59	4.54	12.4	5.14	6.23	13.21	11.45	6.57	17.52
E. nitidus	MSB58644	F	310	153	35	22	83	5	31.24	9.62	6.57		4.5	5.95	6.03	16.9	4.58	12.62	5.25	6.74	13.17	11.16	7.24	18.39
E. nitidus	MSB59878	M	243	126	34	23	46	1	27.58	7.81	6.06	4.9	4.16	4.94	5.86	15.44	3.72	11.95	5.38	6.02	11.39	10.54	6.73	16.16
E. nitidus	MSB59879	F	255	132	32	21	45.5	2	28.15		6.08	4.81	3.88	5.26	5.61	16.02	3.93	12.04	5.22	5.92	12.1	10.99	6.84	17.52
E. nitidus	MSB59880	F	281	152	31	24	47	2	28.62	8.35	6.22	4.51	4.57	5.41	5.92	15.46	4.15	11.42	4.87	5.98	11.78	10.85	6.84	16.73
E. nitidus	MSB59881	M	134		34	26	75	3	30.59	9	7.01	4.85	3.95	5.53	6.06	17.31	4.3	12.58	5.45	7.06	13.08	11.46	7.05	17.37
E. nitidus	MSB59882	M	254	136	31	22	45	1	28.53	7.95	6.39	4.57	3.98	5.12	5.51	15.47	3.91	11.66	5.2	5.72	12.14	11.16	6.33	17.61
E. nitidus	MSB63356	F	270	134	33	22	60	3	29.82	8.47	6.07	4.74	3.96	5.48	6	15.95	4.24	12.17	5.21	5.87	12.08	10.93	6.81	17.18
E. nitidus	MSB63357	F	255	130	32	21	51	2	29.16	8.29	6.75	4.69	3.91	5.18	5.55		4.2	12.13	5.17	5.95	12.25	10.81	6.54	17.18
E. nitidus	MSB63358	M	286	148	35	25	57	2	30.15	8.75	6.49	4.84	4.04	5.67	5.78	16.01	4.49	12.05	5.43	6.05	12.72	11.32	6.77	17.35
E. nitidus	MSB63604	M	285	140	32	22	66	2	29.62	8.87	6.46	4.53	3.88	5.33	5.98		4.63	12.19	5.06	6.28	13.25	11	6.74	18.06
E. nitidus	MSB63605	M	300	159	34	16	65.5	3	31.85	9.06	7.11	5.15	3.9	5.45	6.13	16.96	4.49	12.12	5.67	6.69	13.13	11.47	6.74	18.97
E. nitidus	MSB67321	M	303	155	35	21	66	1	30.79	8.46	7.01	5.23	3.85	5.09	6.28	16.94	4.37	12.9	5.64	6.68	13.55	11.2	7.2	18.58
E. nitidus	MSB67322	F	146		31	22	71	3	30.69	8.56	6.29	4.96	3.42	5.85	6.41	17.4	4.32	12.67	5.46	6.44	12.72	11.3	7.05	17.5
E. nitidus	MSB67323	F	284	145	32		68	4	30.54	8.72	6.97	4.92	4.03	5.13	6.43	16.13	4.49	12.46	5.15	6.15	12.59	11.62	7.1	18.12
E. nitidus	MSB68450	M						3	32.45	9.59	7.01	5.02	4.02	6.4	6.27	17.78	4.53	12.48	5.2	6.7	14.16	12.72	7.12	18.29
E. nitidus	MSB68451	M						2	29.55	8.61	6.86	4.8	4.12	5.8	6.01	16.76	4.32	12.58	5.2	6.32	12.57	11.31	6.85	17.41
E. nitidus	MSB68452	F						3	30.89	8.93	6.87	5.13	3.71	6.14	5.6	16.24	3.93	12.55	5.43	5.99	13.29	11.42	7.01	18.36
E. nitidus	MSB68454	F						3	31.6	9.54	6.92	4.82	3.75	5.73	6.25	16.99	4.23	12.15	5.22	6.06	13.52	11.74	7.36	19.3
E. nitidus	MSB68456	M	300	157	32	24	86	4	31.59	9.09	6.94	4.94	3.8	5.33	6.56	17.99	4.57	12.72	5.45	6.88	14.06	11.95	6.94	18
E. nitidus	MSB68457	M	279	144	32	23	68	3	31.94	9.76	7.3	4.92	3.85	5.93	6.34	17.22	4.39	12.2	5.26	6.72	14.13	12.1	7.46	19.38
E. nitidus	MSB68458	M	273	152	39	26	50	2	30.5	8.74	7.16	5.04	4.04	5.65	6.16	16.72	4.36	12.32	5.42	6.25	12.79	11.39	6.86	17.85
E. nitidus	MSB68459	M	252	126	35	20	73	3	30.52	9.07	7.24	4.99	3.87	5.86	6.36	17.27	4.11	12.67	5.56	6.62	12.75	11.94	7.24	18.14
E. nitidus	MSB68460	M	300	161	35	27	74	3	32.26	9.85	7.02	5.1	4.32	6.32	6.4	17.31	4.44	12.44	5.08	6.46	14.17	11.91	7.13	19.71
E. nitidus	MSB68461	M			26	26	58	2	29.94	8.75	6.53	4.97	4.38	5.68	5.92	16.4	4.67	12.63	5.33	6.04	12.75	11.29	6.93	17.77
E. nitidus	MSB68462	M	290	145	32	22	59	2	30.21	9.06	6.3	4.7	3.9	6.13	6.07	16.39	4.12	12.14	5.2	6.55	13.12	11.04	6.71	18.05
E. nitidus	MSB68463	F	261	132	31	24	49	3	29.01	8.68	6.83	4.83	3.72	5.25	6.03	16.23	4.08	12.02	5.03	5.33	12.32	11.29	6.91	17.34
E. nitidus	MSB68464	F	249	117	31	23	43	1	28.56	7.94	7	5.11	3.43	5.16	5.99	15.87	3.9	11.77	5.11	5.77	11.59	11.18	7.03	17.48
E. nitidus	MSB68465	M	124		31	21	58	1	28.92	8.71	6.82	4.95	3.79	5.1	6.16	16.48	3.93	12.18	5.63	6.32	12.2	11.31	7.04	18.52
E. nitidus	MSB68466	F	266	139	31	24	74.9	4	31.8	9.46	7.07	4.82	3.98	6.26	6.21	17.33	4.57	12.33	5.24	6.46	13.8	12.32	6.95	19.18
E. nitidus	MSB68467	M	281	152	31	24	51	4	31.62	9.74	7.37	4.72	3.81	6.01	6.34	16.86	4.62	12.28	5.38	6.25	13.82	11.91	6.84	17.99
E. nitidus	MSB68468	M	287	150	34	24	82	2	31.2	9.36	7.08	5.09		5.6	6.45	17.71	4.47	12.73	5.78	7.11	12.97	12.03	7.48	18.92
E. nitidus	MSB68469	M	267	138	35	22	61	2	30.95	9.06	7.13	4.71	4.27	5.83	6.19	16.63	3.91	12.51	5.35	6.31	12.55	11.63	7.17	18
E. nitidus	MSB68470	M	297	153	34	21	77	3	31.05	9.41	7.02	4.71	4.15	5.89	5.98	16.93	4.38	12.11	5.24	6.21	13.01	12	7	18.54
E. nitidus	MSB68471	M	271	140	32	22	51	3	28.96	8.15	6.35	5.07	3.97	5.68	5.99	16.48	3.67	12.63	5.58	6.12	11.54	10.78	7.14	16.95
E. nitidus	MSB68472	M	303	159	39	26	78	3	30.8	9.53	6.89	4.99	4.14	5.93	6.3	16.78	3.99	12.32	5.38	6.75	13.4	11.73	7.07	18.64
E. nitidus	TTU34982	F	280	142	31	23		3	29.49	8.4	6.23	4.92	3.58	5.5	6.21	17.29	4.38	12.27	5.3	6.09	12.73	10.93	6.92	17.67
E. nitidus	TTU34983	F	248	122	28	20		4	28.23	8.79	6.59	4.46	3.5	5.05	5.99		4.14	11.61	5.42	5.63	12.28	10.45	6.93	16.6
E. nitidus	TTU34984	F	220	109	29	18		1	25.47	7.2	6.53	4.81	3.61	4.2	5.84	15.11	3.38	11.89	5.17	5.61	10.98	9.32	6.81	15.07
E. nitidus	TTU34985	M	265	133	37	21		3	30.41	8.75	6.5	4.7	4.01	5.94	5.96	17.17	4.6	11.97	4.93	6.06	12.37	11.13	7.14	18.21
E. emmonsae	MN73840	F	247	125	34	19	67	2	26.49	7.71	6.24	4.67	3.43	4.72	5.82	14.82	3.23	11.27	4.66	5.11	11.39	10.22	6.55	16.34
E. emmonsae	MN73856	M	293	158	37	23	75	5	31.63	9.55	7.44	4.99	3.99	5.6	5.87	16.66	4.35	12.23	4.75	6.39	13.86	12.16	6.95	18.35
E. emmonsae	MN73907	M	282	149	35	23	60	3	29.58	8.43	6.68	4.96	3.83	5.37	5.59	15.05	3.92	11.8	5.06	5.89	13.17	11.26	6.79	16.81
E. emmonsae	MN73914	M	285	155	33	23	55	5	30.19	8.91	6.75	4.52	3.94	5.36	5.81	16.45	3.91	12.23	4.95	6.2	13.01	11.24	7.08	17.36
E. emmonsae	MN73923	F	266	146	33	22	50	3	29.25	8.5	6.59	4.82	3.63	4.96	5.75	15.92	3.21	12.13	5.07	6.04	12.62	11.02	7.1	17.76
E. emmonsae	MN73941	M	301	168	35	22	64	3	29.24	8.84	6.57	4.9	3.59	5.49	6.03	16.44	4.03	12.17	4.63	6.32	13.76	11	6.96	17.91
E. emmonsae	MN73952	F	251	135	32	22	53	2	27.83	7.83	6.21	4.88	3.53	5.83	5.77	15.88	3.65	11.57	4.75	5.73	11.82	10.93	6.53	16.67
E. emmonsae	MN73960	M	276	151	33	21	64	3	28.63	8.03	6.29	4.38	3.44	4.89	5.42	15.99	3.51	11.38	4.53	5.91	11.85	10.67	6.57	16.6
E. emmonsae	MN75372	M	308	163	37	24	75	5	31.05	8.66	7.56	4.91	4.37	4.65	6.32	17.71	3.93	12.97	5.4	6.6	13.79	11.24	7.11	18.12
E. lamia	AMNH134644	M	315	160	37	21	100	3	34.5	10.36	8.08	5.11	4.05	6.09	6.88	18.65	4.85	13.71	5.67	7.62		11.62	7.37	21.17
E. lamia	AMNH134663	F	305	150	35	20	90	5	33.92	10.52	8	5.11	4.39	5.67	6.67	18.52	5.22	13.05	5.48	7.12	15.12	12.14	7.31	21.29
E. lamia	AMNH134664	M	300	145	33	21		3	33.99	10.7	8.2	5.29	4.33	6.42	6.78	18.39	5.2	13.52	6.11	7.22	15.4	12.66	7.49	21.35
E. lamia	AMNH134665	F	300	150	35	21	70	4	32.56	10.23	7.49	5.16	4.2	5.97	6.96	18.22	5.29	12.78	5.65	6.79	14.27	12.26	7.29	19.81
E. lamia	AMNH134666	M	300	150	35	21	90	4	33.89	10.47	7.95	5.02	4.19	6.35	6.79	19.38	4.53	13.13	6.1	6.9	14.78	12.35	7.27	20.77
E. lamia	AMNH134667	M	300	155	35		100	3	33.33	10.53	7.99	5.05	4.32	5.73	6.74	18.48	4.63	12.47	5.84	7.11	14.92	12.86	6.84	20.18
E. lamia	AMNH134677	M	300	150	35	22	90	2	32.96	9.73	7.9	5.26	4.23	6.08	6.49	17.94	4.7	12.69	5.99	6.98	14.11	12.28	7.27	20.26
E. lamia	AMNH134763							2	32.62	9.85	7.67	5.12	4.17	6.07	6.79	18.55	4.94	13.12	5.75	7.11	13.87	12.21	7.33	20.3
E. lamia	AMNH134782		325	165	35	23	100	5	34.82	10.94	8.17	4.97	4.37	6.64	7.17	19.38	5.55	13.49	6.43	7.97	15.53	12.59	7.56
E. lamia	MNRJ-CRB1024							3	32.79	9.95	7.33	4.84	3.97	5.97	6.25	17.85	4.85	12.46	5.74	6.55	14.16	12.05	7.02	18.92
E. lamia	MNRJ-CRB906							3	32.43	9.72	7.53	4.91	4.1	6.08	6.51	18.23	4.8	13.12	5.52	6.66	14.09	12.65	6.92	19.41
E. lamia	MNRJ-CRB926							4	32.35	9.7	6.63	5.01	4.15	6.51	6.33	18.57	4.43	12.55	5.57	6.7	13.59	12.78	6.93	18.99
E. lamia	MNRJ-CRB964							3	32.85	10.23	7.93	4.91	3.95	6.19	6.62	18.64	4.63	13.34	5.86	6.73	13.8	12.32	7.29	19.49
E. lamia	MNRJ-CRB968							2	31.76	9.33	7.16	4.8	3.81	5.66	6.2	17.57	4.73	12.42	5.65	6.54	13.63	11.79	6.64	19.25
E. lamia	MNRJ-CRB969							3	30.38	9.06	6.79	4.77	4.12	5.83	6.24	17.73	4.33	12.44	5.53	6.38	13.03	11.92	6.89	18.26
E. lamia	MNRJ-CRB983							4	32.93	10.2	7.3	4.79	4.42	6.08	6.49	18.35	3.84	12.83	5.47	6.64	13.73	12.7	7.35	19.43
E. lamia	MNRJ3364	F	265	140	33	22	60
E. lamia	MNRJ34187	M	295	145	33	20	85	3	32.57	10.01	7.48	5.2	4.3	5.96	6.72	18.85	4.75	13.5	5.77	6.81	15.42	11.98	6.98	19.71
E. lamia	MNRJ34188	F		140	34	19	70	2	30.72	8.81	6.89	5.11	4.34	5.27	6.53		4.18	12.93	5.57	7.07	13.72	11.8	7.1	19.62
E. lamia	MNRJ4067	M	330	170	33	20	100
E. lamia	MNRJ4352	M			33	20	95	3	34.42	10.91	8.19	5.21	4.21	6.05	6.82	18.91	5.65	13.46	5.9	6.98	15.02	12.82	7.22	20.93
E. lamia	MNRJ4354	M	305	150	34	23	95	4	34.1	10.55	7.71	5.13	4.21	6.49	6.82	19.45	5.53	13.57	5.92	7.22	14.98	13	7.01	21.54
E. lamia	MNRJ4437	M	325	165	33	22	100
E. lamia	MNRJ5203							2	31.3	9.18	6.89	5.14	4.02	5.84	6.28	17.42	4.67	12.46	5.16	6.3	13.56	11.3	6.96	19.55
E. macconnelli	AMNH130880	F	309	154	36	21		3	31.36	9.4	7.79	5.13		5.32	6.38	16.65	3.7	12.12	5.51	6.58	13.49	11.01	6.86
E. macconnelli	AMNH130908	M	320	174	33	21		5	31.06	9.53	7.5	5.15	3.8	5.06	7.18	17.51	3.82		5.64	6.7	13	11.14	6.83	17.99
E. macconnelli	AMNH130913	M	288	151	36	19		2	29.87	9.08	7.19	5.07	3.57	5.28	6.52	16.4	3.49	12.49	5.66	6.7	13.23	10.83	7
E. macconnelli	AMNH130928	M	315	175	35	21		2	31.69	9.6	7.96	5.15	3.7	5.15	6.47	16.71	3.85	12.16	5.38	6.88	14.1	11.18	7.25	18.36
E. macconnelli	AMNH130975		275	150	32	20		4	29.27	8.58	7.45	4.95	3.39	4.54	6.42	15.99	3.21	12.28	5.05	6.03	12.44	10.26	6.68	16.22
E. macconnelli	AMNH130976	F	282	143	33	21		3	30.23	9.18	7.58	4.95	3.79	4.78	6.97	16.38	3.06	12.09	5.31	6.63	13.44	10.58	7.38	16.8
E. macconnelli	JLP15548	F	303	159	35	23	87	4	31.21	9.67	7.3	5.14	3.74	5.41	6.47	16.06	3.33	12.48	5.47	7.2	13.44	11.08	7.21	17.39
E. macconnelli	JLP15549	M	133		33	23	82	3	30.43	9.56	7.98	5.08	4.1	5.05	6.42	16.4	3.72	12.19	5.36	5.87	12.99	11.23	6.83	17.91
E. macconnelli	JLP15563	M	305	160	36	23	87	3	32.26	9.44	7.96	5.49	3.81	5.17	6.46	17.07	4.05	12.9	5.63	6.55	13.57	11.74	7.38	18.13
E. macconnelli	JLP15600	F	273	130	33	22	80	4	30.61	9.25	7.67	5.01	3.57	5.42	6.72	17.27	3.98	12.48	5.79	6.71	13.66	10.78	6.94	17.6
E. macconnelli	JLP15619	F	287	152	35	23	73	3	30.01	8.98	7.65	5.12	4.03	4.64	6.61	16.34	3.74	12.18	5.41	5.83	13.03	10.98	6.82	17.89
E. macconnelli	JLP15859	M	305	159	36	24	87	3	30.69	9.24	7.7	5.06	3.69	5.12	6.5	16.6	3.64	12.55	5.2	5.81	13.33	11.13	7.11	18.07
E. macconnelli	JUR355	F	125		31	21	60	1	28.65	8.54	6.89	4.97	3.41	5.03	6.03	14.82	3.29	11.64	5.04	6.22	12.53	10.51	6.7	16.99
E. macconnelli	JUR393	F	280	145	33	21	82	2	30.41	9.19	7.77	5.18	3.6	5.07	6.08	15.53	3.33	12.44	5.19	5.81	13.32	11.29	6.92	18.36
E. macconnelli	LSUMZ14366	F	270	134	32	23	80	3	30.2	9.5	7.62	5.22	3.67	5.29	6.5	16.72	3.67	12.77	5.03	6.25	12.94	10.69	7.2	17.7
E. macconnelli	MNRJ-M15489	F	270	140	35	20	60	1	30.49	9.19	7.76	4.99	3.94	5.37	6.55	15.91	3.41	12.09	5.56	6.3	13.05	10.54	7.61	17.38
E. macconnelli	M8271							2	29.52	8.69	7.39	5.16	3.79	5.23	6.27	15.23	4.02	12.18	5.09	5.62	12.43	10.81	7.19	17.09
E. macconnelli	M8312	M	275	145	34	22	75	2	29.99	9.24	7.4	4.82	3.79	5.05	6.31		3.76	12.12	4.97	5.95	13.63	10.77	7.22	16.99
E. macconnelli	M8523	M	295	150	34	22	79	3	29.81	8.71		4.91	3.52	4.35	6.41		3.42	12.45	5.14	6.58		10.51	7.09	16.91
E. macconnelli	MNRJ11664	M	260	130	33	20		1	29.28	8.37	6.99	5.36	4.24	4.89	6.43	16.45	3.41	12.75	5.42	5.95	12.59	10.87	7.25	17.07
E. macconnelli	MNRJ20301	F	120		33	20	45	1	27.62	7.92	7.39	5.07	3.68	4.41	6.02		2.86	11.49	5.02	5.25	11.69	9.95	6.91	16.86
E. macconnelli	MNRJ20302							1	28.06	8.45	7.72	5.26	3.79	4.55	6.36	14.7	2.8	11.82	5.71	5.88	12.63	10.05	7.34	16.9
E. macconnelli	MNRJ20531	M	260	135	34	20	62	1		8.8	6.21	4.8		4.73	5.73		3.28		5.53	5.76	12.48	10.17	6.98	16.93
E. macconnelli	MNRJ20533	M	255	130	33	20	53	2	31.19	8.87	7.53	5.15	3.71	4.73	6.35	16.06	3.77	11.96	5.58	6.39	13.49	11.46	7.52	17.14
E. macconnelli	MNRJ20535	M	145		37	20	82
E. macconnelli	MNRJ20536	F	250	135	34	19	50	1		8.26	7.36	5.08		4.69	5.88				5.42	5.71				16.6
E. macconnelli	MNRJ20538	M	240	130	33	18	42	1	27.76	8.07	7.69	4.73	4.13	4.31	5.93	14.33	3.27	11.43	5.26	5.54	11.49	10.17	7.37
E. macconnelli	MNRJ20887	F	205	105	30	18	25	1	25.19	7.36	5.96	4.53	3.8	4.25		13.46	2.78	11.23	5.1	5.69	10.15	8.72	7.07	14.75
E. macconnelli	MNRJ20902	F	265	135	34	22	60	1	29.25	8.28	7.29	4.83	3.76	4.7		15.45	3.18	11.69	5.11	5.82	12.14	10.64	7.61	16.73
E. macconnelli	MNRJ20903	M	265	135	33	22	70	2	29.05	8.5	7.47	4.86	3.99	4.88		15.61	3.34	11.96	5.19	5.41	11.97	10.59	7.32	16.98
E. macconnelli	MNRJ20906	M	140		35	26	80	2	30.35	8.81	8.32	5.04	3.82	4.06	5.91		3.5	12.74	5.41	6	13.15	11.08	7.7	17.55
E. macconnelli	MNRJ20907	F	295	155	35	23	60	4	31.2	9.37	8.53	5.06	4.05	4.67	6.64	17.38	3.89	12.02	5.61	7.07	14.06	11.62	7.43	18.84
E. macconnelli	MNRJ20909	M	285	150	35	23	60	2	30.08	9.07	7.18	4.96	3.53	4.8	6.02		3.66	11.59	5.05	5.98		11.23	6.89	16.75
E. macconnelli	MNRJ20915	M	265	135	34	24		2	28.72	8.36	7.54	4.78	3.74	4.13	5.88	15.73	3.36	12.37	5.22	6.11	12.2	10.55	7.44	15.87
E. macconnelli	MNRJ20916	M	222	112	27	20	20
E. macconnelli	MNRJ27957	M	284	145	32	20	75	4	31.65	9.49	8.25	5.24	3.92	5.32	6.5	16.87	4.26	12.41	5.19	6.66	13.62	11.51	7.36	17.74
E. macconnelli	MNRJ29495		109					3	26.66	8.02	6.84	4.76	3.83	3.98					5.27	6.19	11.38			16.72
E. macconnelli	MNRJ29496		283	148	36			3	29.61	9.18	7.27	5.01	4.1	5.16	6.63	16.29	3.47	12.27	5.82	6.5	13.15	10.89	6.87	16.69
E. macconnelli	MNRJ29498		315	172	37			2	30.98	9.49	7.97	5.23	4.14	5.17	6.81		3.77	12.27	5.79	6.67	13.72	11.33	7.49	18.07
E. macconnelli	MNRJ29499		274	144	33			2	30.3	9.15	7.56	5.31	4.03	5.09	7.11	16.18	4	12.69	6.1	6.25	13.05	10.69	7.61	17.58
E. macconnelli	MNRJ29501		266	132	33			2	28.43	8.6	6.86	4.97	3.65	4.94	6.34	14.48		11.46	5.23	6.38	12.27	10.68	6.99	17.09
E. macconnelli	MNRJ29502		136		34			3	29.11	8.61		4.7	3.85	5.05	5.97	14.7	3.5	12.85	5.31	6.52	12.37	10.64	6.98
E. macconnelli	MNRJ29503		285	145				3	30.18	9.14	7.64	4.95		5.08	6.54	15.9	3.28	12.04	5.06	6.17	13.16	11.58		17.93
E. macconnelli	MNRJ29504		246	134	34			3	29.1	8.81	7.12	4.9		4.37	6.7		3.29		5.47	6.05	12.76	10.56	6.82	17.08
E. macconnelli	MNRJ29505		257	133	32			4	28.73	8.89	6.69	4.97		4.94	6.7		3.86	12.53	5.55	5.95	12.41	10.77	7.48	16.52
E. macconnelli	MNRJ29507		292	160	37			3	31.52	9.81	8.19	5.11		5.66	6.93	15.98	3.57	12.4	5.6	6.26	13.84	11.24	7.86	17.62
E. macconnelli	MNRJ29509		133		33			2		9.38	7.53	5		4.5	6.57		3.29		5.56	6.29	13.14			18.03
E. macconnelli	MNRJ29510		284	142	33			3		9.07	7.87	5.2		4.96	6.74					5.91	13.29			18.1
E. macconnelli	MNRJ29520		262	131	34			2	30.59	9.58	7.91	4.99	3.92	5.29	6.64	15.36	3.47	12.41	5.31	6.06	12.94	11.28	7.22	17.68
E. macconnelli	MNRJ29522		262	133	37			2		9.41	7.56	4.9		5.66	5.78		3.71		5.46	6.59	12.72			16.97
E. macconnelli	MNRJ29525		299	152	33			5		10.64		5.2		5.25	6.57		3.8		5.5	6.25	13.76	11.8		17.13
E. macconnelli	MNRJ29526		280	149	37			2	30.58	9.26	7.84	4.75		4.93	6.58	16.59	3.86	12.28	5.45	7	13.36	11.49	7.02	18.24
E. macconnelli	MNRJ29532		135		33			2	28.72	9.11	6.92	4.82		4.82	6.39	14.61	3.43	11.52	5.49	6.09	12	10.43		16.91
E. macconnelli	MNRJ29533		118		33			2	29.01	9.12	6.9	5.18	3.97	4.95	6.87		3.52		5.48	6.18	12.62	10.73	6.87	16.35
E. macconnelli	MNRJ29536		290	158	35			3	30.9	9.49		4.69		4.71	6.51		3.75		5.77	6.78		10.12	7.78	17.19
E. macconnelli	MNRJ29539		282	147	35			4	30.19	9.15	7.64	4.91	3.85	4.61	6.61	15.69	3.59	12.33	5.62	6.61	12.65	11.06	7.04	17.52
E. macconnelli	MNRJ29542		291	154	37			3	30.36	9.42	7.36	4.79		4.36	6.38		3.71	12.5	5.75	5.58	13.52	10.67	7.84
E. macconnelli	MNRJ29547		307	160	35			3		10.19	8.41	5.01		4.97	6.69			13.02	5.92	6.57	14.04			19.07
E. macconnelli	MNRJ29548		287	151	35			3	31.26	9.38		5.5	3.8	5.5	6.74	15.86	3.5	12.58	5.5	6.08		11.35	7.27	17.63
E. macconnelli	MNRJ29558		255	132	31			3		8.74		4.78		4.14	6.21	14.66	3.1		5.44	5.89	12.56	10.7		16.12
E. macconnelli	MNRJ29559		266	131	34			2		8.07	6.89	5.06		4.31	6.65	15.7		11.19	5.2	5.75	11.57	10.64	7.1	16.86
E. macconnelli	MNRJ29560		277	145	33			2	29.54	9.19	7.54	5.17		5.4	6.33	15.38		12.14	5.31	5.63	13.72	10.65	7.19	16.79
E. macconnelli	MNRJ29561		132		36			4	30.55	9.63	7.56	4.97	4.07	5.27	6.6		3.47	12.49	5.23	6.64	13.71		7.54	18.24
E. macconnelli	MNRJ29564		130					2	30.5	9.7	8.04	5.15		5.57	6.62		3.51	12.07	5.45	6.38	14.62	11.4	7.87	17.4
E. macconnelli	MNRJ29570		306	154	38			4	31.32		7.93	5.5		5.22	6.86	16.21	3.28	12.33	5.55	6.4	13.76	11.57	7.8	18.67
E. macconnelli	MNRJ29571							3			7.15	4.84		5.19	6.08		3.25		5.13	6.14				16.09
E. macconnelli	MNRJ29573		145	145				3	31.56	9.92	7.74	5.01	4.01	5.28	6.67	17.15	3.24	12.27	5.19	6.45	13.33	11.83	6.88	18.81
E. macconnelli	MNRJ29585		271	143	34			2	30.69	9.47	7.49	4.92	4.17	5.02	6.38		3.35	12.55	5.88	6.42	13.2		7.05	17.8
E. macconnelli	MNRJ29589		288	149	37			3	31.24	9.39	7.66	5.06		5.2	6.5		3.57	12.36	5.23	6.67	13.65	11.88	7.79	17.77
E. macconnelli	MNRJ29591		288	145	35			2		9.55		4.8		5.37	6.69	17.22	3.78		5.6	6.94	13.88	11.34		18.34
E. macconnelli	MNRJ29592		250	120				2	28.74	8.82		4.97		5.1	6.42		3.23		5.12	5.27	12.42	10.72	7.52
E. macconnelli	MNFS529	M	299	153	36	25	105	3	32.6	10.06	8.34	5.29	4.28	5.11	7.02	16.97	4.15	12.51	5.59	6.84	13.72	11.55	7.15	17.98
E. macconnelli	MNFS530	M	290	147	38	23	96	3	31.42	9.47	7.97	5.43	3.71	5.45	6.6	17.13	3.45	12.47	5.8	7.06	13.4	11.16	7.45	18.42
E. macconnelli	MNFS548	M	249	130	33	21	59	1	28.89	8.57	7.4	5.05	3.94	4.61	6.21	15.34	3.42	12.68	5.45	6.05	12.02	10.37	7.43	17.19
E. macconnelli	MNFS549	F	140		34	22	79	2	30.3	9.26	7.42	4.94	3.68	5.26	6.77	16.53	4.12	12.81	5.52	6.5	13.18	10.7	7.35	17.69
E. macconnelli	MNFS550	M	299	150	34	22	85	2	31.48	9.47	7.61	5.16	3.81	5.59	6.63	17.07	3.96	12.4	5.19	6.57	12.01	11.42	6.82	17.29
E. macconnelli	MNFS563	M	288	138	35	24	94	2	32.35	10.11	7.83	5.22	3.49	5.83	6.54	16.08	3.47	12.74	5.9	6.59	13.23	11.27	7.12	18.53
E. macconnelli	MNFS747	M	303	157	33	24	80	3	30.72	9.98	7.73	5.16	3.25	4.83	6.66	16.92	3.47	12.66	5.43	6.43	13.04	10.69	7.27	18.11
E. macconnelli	MPEG10111	M	222	112	32	17	45	1	27.56	8.19	7.06	4.97	3.49	5.13	5.91		3.06	11.65	5.24	5.67	12.19	9.75	6.8	16.17
E. macconnelli	MPEG13163		130		31	18	64	3	29.13	8.86		4.67	3.64	4.7	5.62	15.45	3.56	11.86	5.24	6.26	12.81	10.42	7.06	16.52
E. macconnelli	MPEG15101		275	150	33	18	60	2		8.52	6.17	4.76	3.74	5.63	5.81	15.72	3.38	11.79	5.07	5.72	11.45	11.38		16.33
E. macconnelli	MPEG15103	M	275	145	36	19	60	2	30.02	9.13	7.1	5.13	3.85	5.74	5.98			11.75	4.84				7.26	17.55
E. macconnelli	MPEG15104	F	310	165	35	21	87	3	30.95	9.4	8.25	5.03	3.93	4.94	6.96	17.09	3.97	12.36	5.53	7.12	13.42	10.97	7.35	18.39
E. macconnelli	MPEG15105	M	125		34	20	71	2	28.15	8.33	6.65	5.12	3.58	5.23	6.13		3.05	11.69	5.35	5.66	11.82		7.1	16.31
E. macconnelli	MPEG15106		135		34	21	71	3		9.82	8.36			4.82			3.9		5.16	6.13	13.53	11.05		17.49
E. macconnelli	MPEG15107	F	210	110	31	18	39	1		7.56		5.15		4.24	5.84	13.7	2.8		4.81	5.13	0.89	9.39		15.02
E. macconnelli	MPEG15108	M	220	110	32	20	45	2	26.6	7.89	7.44	5.08	4.11	4.26	6.03	14.05	3.32	11.13	5.41	5.4		9.6	6.47	15.85
E. macconnelli	MPEG15109	F	260	140	33	19	65	2	28.89	8.85	7.01	4.92	4.23	5.23	6.18		3.39	11.69	5.23	5.95	13.07	10.49		16.51
E. macconnelli	MPEG15110	M	275	140	36	21	73	3	29.82	9.34	7.19	5	3.91	5.14	5.99	16.41	3.36	12.53	5.03	6.2	12.88	11.22	7.32
E. macconnelli	MPEG15111	F	245	125	33	19	47	1	27.43	7.89	6.67	5.1	3.99	4.99	5.78	13.79	3.38	11.24	5.15	5.78	11.74	9.5	6.63	16.34
E. macconnelli	MPEG15113		205	105	30	19	35	2	26.04	7.76	6.35	4.96		4.85	6.03		2.81	11.07	4.98		10.84	10.2	6.85
E. macconnelli	MPEG15114	M	240	125	31	18	55	3	27.45	7.93	6.61	5.15		4.93	6.15		3.22		5.58	6.48	11.93	10	6.83	16.05
E. macconnelli	MPEG15115	M	225	115	30	16	45	3	27.38	8.37		4.95	3.79	4.96	6.41	15.22	3.38	11.96	4.89	6.14		10.21	6.54	17.21
E. macconnelli	MPEG15116	M	200	100	29	17	31	2	24.88	7.28	6.47	4.83		4.05	6.15	14.82	2.97	11.37	5.23	5.97	10.96	9.55	6.48	15.02
E. macconnelli	MPEG15117	M	240	120	33	18	55	3	26.92	7.74	6.76	4.81	3.49	4.76	6.11		2.77	11.97	5.24	5.58	12.37	9.97	6.86	16.36
E. macconnelli	MPEG15118	M	275	145	37	20	70	3	30.01	9		4.86	3.63	5.88	6.19		3.89	12.44	5.4	6.89	13.28	11.08	7.14	17.75
E. macconnelli	MPEG15122	F	135		33	18	50	3	29.47		7.63		3.67	5.25		15.86	3.87	11.52	4.96	6.11	12.43	10.93	7.1	17.73
E. macconnelli	MPEG20136							2	28.85	8.48	6.59	4.89	3.95	5.04	5.6	14.93	3.6	11.43	4.52	5.72	12.47	10.84	6.92	17.68
E. macconnelli	MPEG20517	M
E. macconnelli	MPEG2470	M	275	140	35	22	74	3	28.51	8.72		4.89	3.53	4.78	6.51	15.79	3.4	12.37	5.11	5.75	12.77	10.41	7.32	16.29
E. macconnelli	MPEG2471	F	285	145	35	21	75	3	30.4	8.84	7.81	5.19	3.43	5.19	6.75	15.92	3.6	11.9	5.21	5.95	13.87	10.63	7.24	17.39
E. macconnelli	MPEG2476	M	275	140	35	20	64	3	29.08	8.44	7.98	5.14	3.56	4.33	6.49		3.69	12.44	5.26	5.89		10.2	7.25	16.62
E. macconnelli	MPEG2588	F	255	135	31	20	56	2	27.76	7.82	7.15	5.18	3.93	4.79	6.18	14.8	3.29	11.66	5.23	5.73	11.88	10.06	7.08	16.22
E. macconnelli	MPEG2601	F	270	140	33	20	60	3	28.97	8.32	7.47	4.87	3.53	5.02	6.36	15.45	3.45	11.61	4.91	5.36	12.55	10.47	7.23	16.55
E. macconnelli	MPEG2611	F	270	135	34	21	58
E. macconnelli	MPEG2622	M	255	130	33	19	64	2	28.02	8.25		4.72	3.5		5.95	14.86	3.01	12.34	5.21	5.75	12.46	9.93	7.01	16.16
E. macconnelli	MPEG2624	F	300	155	36	23	80	3	32.05	9.41	8.12	5.33	3.76	5.24	6.73		3.95	12.75	4.91	6.05	13.57	10.79	7.9
E. macconnelli	MPEG2633	M	245	125	33	21	62	4	28.1	8.53	5.76	4.64	3.71	5.1	6.28	15.23	3.1	12.59	5.04	5.5	12.17	10.67	7.16	16.64
E. macconnelli	MPEG2644	M	255	125	34	20	59	2	28.48	8.64		5.05	3.84	4.74	6.31		3.34	11.83	4.81	5.67	12.35	10.63	6.99	16.09
E. macconnelli	MPEG8184	F	190	100	30	15	35	3	25.37	7.44	6.51	4.79	3.45	4.42	6.12		2.89	11.82	5.02	5.59	12.02	9.84	6.3	15.04
E. macconnelli	MPEG8188	M	245	130	30	16	45	3	29.27	8.98	7.12	4.81	3.93	4.68	5.87	15.84	3.69	12.09	6.13	6.55	13.15	10.89	6.63	16.82
E. macconnelli	MPEG8189	M						2	27.7	7.93	6.49	4.86	3.44	4.94	5.97	15.38	3.37	11.86	4.55	5.63	11.65	10.65	6.6	16.53
E. macconnelli	MPEG8190	M	255	135	32	19	50	2	27.8	7.87	6.06	4.76	3.79	4.7	5.9	15.33	3.55	11.5	5.16	5.96	12.1	10.49	6.49	15.97
E. macconnelli	MPEG8191	M	260	140	32	17	50	2		8.64	7.08	4.87		4.53	6.08	15.99	3.87	11.99	4.77	6.02	12.97	10.73		16.4
E. macconnelli	MPEG8192	M						2		6.28	6.17	4.86	3.75	4.41	5.9		2.95	11.45	5.23	5.28	10.48	10.01	7.43
E. macconnelli	MPEG8193	M	260	120		18	40	2	26.27	7.54	6.16	4.82	3.68	4.36	5.4	14.03	3.23	11.53	4.92	5.16	10.97	9.9	6.94	15.53
E. macconnelli	MPEG8199	M						2	28.39	8.5	6.8	4.84		5.01	5.93			11.86	5.2	5.81	12.26		6.7	16.48
E. macconnelli	MPEG8207	M						3	28.66	8.13	6.54	5.05		4.88	6.04	16.17	3.47	12.21	4.95	6.15	12.45	11.66	6.56	16.56
E. macconnelli	MPEG8208	M	280	150	36	21	65	2		9.34		4.88	3.84	5.18	6.22	15.14	3.5	12.1	5.18	5.89	13.14	10.25		17.13
E. macconnelli	MPEG8211	M	250	130	34	20	46
E. macconnelli	MPEG8212	F	240	125	32	19	51	2	26.96	7.89	6.5	4.93	3.86	4.76	5.67		3.25	11.31	4.78	5.44	11.67	9.72	6.89	15.78
E. macconnelli	MPEG8213	M	310	160	36	21	77	3	31.34	9.57	8.26	5.18	3.74	5.24	6.56	16.95	3.73	12.73	5.65	5.93	13.29	11.36	7.22	18.31
E. macconnelli	MPEG8214	M	220	110	33	19	38	2	29.03	8.8	7.04	4.99	4.1	5.24	6.19	15.21	3.65	12.33	4.91	6.31	13	9.98	7.24	16.47
E. macconnelli	MPEG8215	M	280	155	34	19	56	2	28.95	9.04	7.28	5.02	3.95	4.94	6.12	15.15	3.68	11.99	4.88	5.82	12.49	10.45	7.15	15.9
E. macconnelli	MPEG8216	F	280	145	35	19	54	1	29.52	9.03		5.05	3.72	5.39	6.14		3.46		4.98	5.59	12.68	10.93	6.91	17.2
E. macconnelli	MPEG8217	M	310	165	36	21	70	4	31.11	9.48		5.19	3.86	5.22	6.72		3.63	12.6	5.39	6.76	12.97	10.96	6.78	17.56
E. macconnelli	MPEG8218	F	255	135	34	20	55	2		8.52		4.97	3.88	4.54	6.01		3.12	11.19	5.23	5.86	12.58	10.41		15.99
E. macconnelli	MPEG8219	F	150		36	21	81
E. macconnelli	MPEG8220	M	245	125	33	19	47	2	28.88	8.69	7.23	5.07	4.06	5.16	6.38	15.73	3.2	11.87	5.12	5.69	12.56	10.44	7.08
E. macconnelli	MPEG8221	M	295	155	36		78	3	31.14	9.77	7.68	4.91	3.91	5.41	6.62	15.83	3.68	12.36	5.23	6.54	13.77	10.76	7.34	17.88
E. macconnelli	MPEG8224		230	120	32	17	48	3		7.96	6.83	4.92		4.87	6.04		2.66	11.5	5.18	5.41	12.24	10.14		16.16
E. macconnelli	MPEG8225		235	125	32	17	50	3	27.99	8.3	7.1	5.03	3.48	4.52	5.93	15.1	3.41	11.29	5.17	5.64		10.31	6.61	16.17
E. macconnelli	MPEG8226		230	115	32	18	45	2	27.14	8.42		5.02	3.78		5.09			12.18	5.16	5.5		9.93	7.04
E. macconnelli	MPEG8227		235	120	33	17	50	2	27.73	7.96	7.31	5.37	3.53	4.56	6.13	15.38	3.24	11.66	5.37	5.79	11.75	10.01	6.79	15.95
E. macconnelli	MPEG8228		220	115	30	18	40	3	28	7.92		4.97	3.59		5.87	14.9	3.23	11.92	5.39	6.31	12.67	9.96	6.95	16.29
E. macconnelli	MPEG8252	F	320	170	39	22	102	5	32.66	10.04	8.04	5.34	4.3	5.57	7.02	16.68	4.25	12.14	5.19	6.72	14.27	11.26	7.34	18.78
E. macconnelli	MPEG8253				37	20		4		9.59	8.16	5.3	3.67	5.54	6.5	16.65	3.27	11.38	4.93	6.38	13.89	11.58		17.8
E. macconnelli	MPEG8256	M	290	155	33	20	75	3		8.98	7.69	5.24	3.9	5.38	6.41	15.86	3.5	11.55	4.98	6.25	12.83	11.33		17.51
E. macconnelli	MPEG8410	F	250	125	34	14	45	2	27.43	8.24	7.41	5.15	3.99	4.79	6	14.49	2.48	11.61	5.35	5.71	11.78	9.71	7.1	16.59
E. macconnelli	MPEG8422	F	240	125	32	19	50	1	27.31	8.37	6.84	4.98	3.86	4.89	5.89		3.05	11.84	5.19	5.69	11.79	9.56	6.87	16.45
E. macconnelli	MPEG8655							2	27.01	7.77	6.55	4.86		4.97	5.36		3.2	10.86	4.96	5.29			6.4	14.62
E. macconnelli	MPEG8656							3	29.07	8.48	7.37	4.73		4.81	5.86		3.25	11.85	5.1	5.74	12.18		7.05	16.67
E. macconnelli	MPEG8658							2		7.51	6.18	4.94		4.64	5.9				4.98		10.8
E. macconnelli	MPEG8659							2	26.7	8.01	6.12	4.89		4.65	5.85		3.14	11.31	5.04	5.58		10.17	6.44	14.42
E. macconnelli	MPEG8775							3	28.84	8.4	6.97	5.13	3.83	5.03	6.45	15.72	3.52	11.88	5.15	6.47	12.5	10.72	6.57	17.11
E. macconnelli	MPEG8781							1		6.87	5.91	4.81		4.3	5.54		2.6		4.81	5.27	9.98			14.38
E. macconnelli	MVZ153516	M	268	141	36	24	63	1		8.72	7.73	5.25		4.91	6.28	16.7	3.95		5.38	6.13	12.5	10.91		18.07
E. macconnelli	MVZ154972	M	318	158	36	21	93	4	31.74	10.17	7.06	5.16	3.73	6.35	6.79	17.62	3.91	12.79	5.54	6.84	13.74	11.04	7.02	18.04
E. macconnelli	MVZ154974	F	282	135	33	24	70	1	29.98	8.69	7.15	5.2	3.8	5.11		16.42	3.46	12.39	5.18	5.99	12.27	10.68	6.79	16.51
E. macconnelli	MZUSP20520	F	235	125	33	18	44	1	27.15	8.32	7.06	4.84	4.04	4.01	5.98	14.89	3.39	12.03	5.64	5.72	11.94	9.72	6.97	16.06
E. macconnelli	MZUSP20521	M						2				5.01	3.51		6.69	16.71	3.78	12.76	5.25	6.67	14.16	11.28		18.2
E. macconnelli	MZUSP20522	F	250	135	36	17	50	2	29.83	8.86	7.98	5.35	4.17	4.97	6.57	16.02	3.22	12.47	5.22	6.49	13.85	10.23	7.4	17.98
E. macconnelli	MZUSP20523	M	295	150	33	21	95	2		9.54	7.97	5.09	4.28	5.57	6.68	16.73	4.06	12.31	5.19	6.67	13.26	11.63		18.88
E. macconnelli	MZUSP20524	F	290	145	34	20	80	3	31.66	9.57	7.98	4.93	4.11	5.04	6.63	16.74	4.03	12.47	5.06	6.52	13.74	11.14	7.37	18.06
E. macconnelli	MZUSP20525	M	310	170	35	20	85	4		9.64	7.83	4.89	4.19	5.21	6.92	16.93	4	12.36	5.48	6.69	14.29	10.84		17.78
E. macconnelli	MZUSP20526	M	325	170	36	20	90	3	31.92	9.56	8.24	4.98	3.9	5.08	6.48	16.8	3.73	12.76	5.27	6.99	13.94	11.28	7.14	17.99
E. macconnelli	MZUSP20530	M	265	135	37	20	60	1	30.18	8.91	7.29	5.06	3.93	5.1	6.34	15.72	3.83	12.01	5.19	6.15	12.93	10.82	7.48	17.15
E. macconnelli	MZUSP20531	M	300	160	35	21	78	1	30.79	9.23	7.61	4.86	3.96	5.02	6.37	15.76	3.49	12.1	4.9	6.03	13.19	10.86	6.98	16.54
E. macconnelli	MZUSP20533	M	295	155	36	21	75	2	31.09	9.71	8.14	4.86	3.76	4.48	5.99	16	4.03	12.48	5.05	6.82	13.47	10.7	6.88	17.86
E. macconnelli	MZUSP20534	F	270	140	33	19	50	1		8.75		4.94	3.71	4.71	6.07		3.84	12.31	4.89	5.75	12.69	9.63		17.03
E. macconnelli	MZUSP20537	M	275	145	33	21		2	29.68	8.91		4.81	3.52	4.9	6.58	15.33	3.55	12.4	5.09	6.08	13.31	9.83		17.58
E. macconnelli	MZUSP20538	M	275	145	35	21		2	29.81	8.89	7.85	4.86	4.18	4.37	6.52		3.52	12.11	5.23	5.87	12.83	10.71	7.26	16.83
E. macconnelli	MZUSP21980							1	29.8	9.15	7.46	5.06	3.82	4.92	6.46	15.28	3.83	12	4.9	6.25	12.92	10.65	7.21
E. macconnelli	MZUSP21981							2	30.78	9.06	7.49	4.93	3.99	4.84	6.43		3.71	12.56	5.02	6.73	13.87	10.63	7.42	17.69
E. macconnelli	MZUSP21982							2	32.34	10.08		5.02	3.88				3.97	12.18	5.05		13.99	10.81	7.51
E. macconnelli	MZUSP21983							2	31.16	9.9	7.41	5.17	4.02	5.43	6.8	16.33	3.7	12.44	5.44	6.48	14.23	11.36		18.22
E. macconnelli	MZUSP21984							3	29.51	9.3	7.63	4.8	3.68	4.96	6.59	16.01	3.45	11.96	5.15	6.3	12.96	10.37	6.97
E. macconnelli	MZUSP21985							3	27.61	8.23	7.1	5.1	3.75	4.77	6.26	14.63	3.08	11.8	5.15	5.74	12.03	10.61	6.86	15.6
E. macconnelli	MZUSP21990							2	29.93		7.88		3.7	5.33		14.99	3.58	12.4	5.07	6.27	13.18	10.51	7.27
E. macconnelli	MZUSP21993							5		10.02	8.32	5.28	3.93	5.57	6.85		3.8	12.78	5.52	6.47	14.25	11.48		17.39
E. macconnelli	MZUSP21995							2	30.46	8.79	8.05	5.17	3.93	4.73	6.11		3.34	12.5	5.2	5.87	13.01	10.59	7.19	16.44
E. macconnelli	MZUSP21996							1	28.6	8.91	7.04	5	4.15	5.15	6.2		2.87	12.05	4.98	5.99	12.04	10.63	6.86	14.55
E. macconnelli	MZUSP22039							3	30.03	9.38	7.38	4.95	3.89	5.28	6.16	15.49	3.39	11.79	4.93	5.89	13.62	10.33	7.22
E. macconnelli	MZUSP22043							2	30.12	8.99	7.9	5.16	4.07	5.13	6.13	15.69	3.25	12.15	5.1	5.88	12.91	11	6.91	15.59
E. macconnelli	MZUSP22947							2		8.73	7.64	5.27	4.17	4.95	6.25	15.6	3.59	12.19	5	5.62	13.12	10.68
E. macconnelli	MZUSP22950							2	27.18	8.52	7.11	4.76	3.73	5.21	6.3		3.05	12.56	5.02	5.71	12.68	9.83	7.12
E. macconnelli	MZUSP22952							1	30.54		7.16		4.26	5.58		15.59	3.42	12.42	4.99	6.04	12.57	10.89	7.16	16.89
E. macconnelli	MZUSP22962							2	30.29	9.39	7.34	5.09	3.85	5.46	6.42	15.34	3.58	11.91	5.18	6.61		10.97	7.17
E. macconnelli	MZUSP22973							2		8.75		4.93	3.54	4.96	6.16	15.26	3.64	12.17	5.14	6.02	12.58	10.09
E. macconnelli	MZUSP22975							1		8.39	7.07	5.12	3.92	4.34	6.05			11.05	4.82
E. macconnelli	MZUSP22985							2	29.15	8.75	7.28	5.03	3.89	4.99	6.07	14.73	3.3	11.92	5.07	5.46	12.57	10.22	7.47	15.63
E. macconnelli	MZUSP22986							2	29.66	8.92	7.1	5.05	3.68	5.11	6.36	15.09	3.28	12.14	5.37	6.27	12.44	10.66	7.3	16.81
E. macconnelli	MZUSP22988							1	27.36	8.11	6.88	5.16	3.92	4.49	6.08	14.06	3.34	11.66	5.19	5.57	11.48	9.9	7.34	15.39
E. macconnelli	MZUSP22990							3		9.12	7.92	4.97	4.11	5.24	6.43		3.82	12.48	5.11	6.73		11.13		17.46
E. macconnelli	MZUSP22992							1	26.96	8.04	6.87	5.12	3.74	4.6	5.92	14.5	3.14	11.72	5.08	5.4	11.71	9.82	6.94	15.65
E. macconnelli	MZUSP22994							2	28.67	9.23	7.34	4.92	3.94	5.05	6.59	15.32	3.34	12.11	5.17	5.83		10.28	7.21	17.37
E. macconnelli	MZUSP22996							3	29.93	10.5	7.32	5.09	4.02	5.94	6.44	16.16	3.56	12.19	5.26	6.03	12.74	10.82	7.18	17.49
E. macconnelli	MZUSP23031							2		8.78	6.86	4.99		5.48	6.16		3.23		5.33	5.94	12.75	10.17
E. macconnelli	MZUSP23033							1	30.36	9.12	7.96	5.13	3.93	5.16	6.43	15.89	3.94	12.23	4.7	6.63	13.57	10.15	6.91	17.22
E. macconnelli	MZUSP23034							2	28.55	8.42	7.18	4.85	3.57	4.76	5.86	15.23	2.98	11.98	5.04	5.8	12.44	10.3	7.15
E. macconnelli	MZUSP23039							1	29.36	9.13	7.77	4.93	3.86	4.94	6.05	15.21	3.53	12.14	4.99	5.97	13	10.17	6.87
E. macconnelli	MZUSP23040							2	30.02	9.26	7.54	5.13	3.94	5.23	5.98	15.28	3.54	12.2	4.74	6.08	12.48	10.66
E. macconnelli	MZUSP23041							2	30.85	9.29	7.39	5.36	3.95	5.54	6.35		3.69	12.65	5.16	6.2	13.28	11.51	7.4
E. macconnelli	MZUSP23042							2		9.22	7.64	5.15	4.09	5.27	6.3		3.68	11.43	5.01	5.93	12.83	10.95		17.12
E. macconnelli	MZUSP23044							1				4.89	3.77				2.9	11.65	4.97		11.82		6.98
E. macconnelli	MZUSP23045							1	29.86	9	7.4	5.04	4.08	5.05	6.26	15.61	3.55	12.19	4.96	6.08	13.33	10.61	7.05	18.19
E. macconnelli	MZUSP23046							2	29.18	9.12	7.27	4.94	3.89	5.31	6.17	15.36	3.28	12.21	4.77	6.15	12.73	10.66	6.95
E. macconnelli	MZUSP23047							3	31.58	9.55	7.79	5.11	4.18	4.88	6.56	16.23	3.71	12.28	5.58	6.34	13.45	11.48	7.51	17.58
E. macconnelli	MZUSP23048							2		9.2	7.5	5	3.91	5.1	6.2		3.28	11.83	4.84	5.62		10.62		16.87
E. macconnelli	MZUSP23049							2	30.61	9.27	7.88	5.35	4.03	5.11	6.58	16.12	3.67	12.44	4.96	6.65	13.55	10.63	7.19	17.95
E. macconnelli	MZUSP23050							2	28.84	8.76	7.13	5.25	3.81	5.23	6.23		3.56	11.86	5.02	5.36	12.87	10.13	7.54	16.55
E. macconnelli	MZUSP23053							3	31.16	9.3	7.6	5.05	3.78	5.42	6.28	16.05		12.38	5.06	6.16	13.18	11.41	6.97	18.06
E. macconnelli	MZUSP23054							3		9.27		5.3	3.97	4.99	6.74		3.93	12.53	5.4	6.36	13.24	11.59
E. macconnelli	MZUSP23055							3	32.45	9.97	8.59	5	3.96	5.72	6.58	16.58	3.92	13.02	5.25	6.87	13.92	11.44	7.46	18.02
E. macconnelli	MZUSP23056							2		9.21	7.36	5.19	4.35	4.71	6.14		3.52	12.49	5.12	5.95	13.42	10.84		16.63
E. macconnelli	MZUSP23057							2	29.7	9.08	7.52	5.06	3.77	5.32	6.52	15.59	3.75	12.34	5.01	5.48	12.72	10.92	6.9	17.26
E. macconnelli	MZUSP23058							2	28.68	8.61	7.41	5.09	3.64	4.85	5.92		3.1	12.16	5.14	5.61	12.53	10.45		17.02
E. macconnelli	MZUSP23059							4		9.61	7.75	4.91	3.91	5.44	6.59		3.55	12.51	4.98	6.39	13.82	10.88		18.52
E. macconnelli	MZUSP23060							2	29.85	9.32	7.58	5.09	3.96	5.13	6.51		3.69	12.3	5.12	6.24	13.02	10.62	7.34	17.07
E. macconnelli	MZUSP23061							4	31.74	9.79	8.46	4.99	4.12	5.2	6.65	17.37	4.04	12.85	5.09	7.28	14.25	11.1	7.22	18.11
E. macconnelli	MZUSP23062							2	29.41	8.92		5.21		4.71		15.07	3.42	12.18	5.4	5.64	13.22	10.65		17.18
E. macconnelli	MZUSP23064							2		9.16	7.44	5.13		5.38	6.36	15.44	3.38	11.78	4.69	6.08	12.92	10.81		17.31
E. macconnelli	MZUSP23065							2	30.87	9.08	7.96	5.01	3.97	5.07	6.22		3.4	11.85	5.2	6.06	13.24	11.2	7.57	17.45
E. macconnelli	MZUSP23066							3	30.4	9.32		5.01	4.04	5.1	6.38	15.6	3.8	12.38	5.28	6.36	13.27	10.42	7.15	17.37
E. macconnelli	MZUSP23068							2	29.69	9.03		5.09	4.08	5.37	6.38	15.68	3.39	12.46	5.21	6.43	13	10.47	7.17	16.8
E. macconnelli	MZUSP23070							2	32.13	9.77	7.67	5.32	4.06	5.62	6.58	17.33	4.45	12.89	5.34	6.99	13.94	11.14	7.76	18.62
E. macconnelli	MZUSP23072							3		9.04	7.62	5.1	3.99	5.23	6.3	15.92	3.58	12.23	5.28	6.44	13.06	10.86		17.49
E. macconnelli	MZUSP23073							3		9.96	7.41	5.01		5.75	6.61	16.36	3.5	12.37	5.21	6.71	13.28	10.96
E. macconnelli	MZUSP23075							4	32.5	10.19	7.65	5.16	3.74	5.73	6.86	16.89	4.15	12.92	5.28	7.12	14.3	10.97		18.75
E. macconnelli	MZUSP23076							2	29.66	9.12	7.55	5.28	3.95	5	6.68		3.55	12.31	5.08	6.44	13.13	10.4		16.98
E. macconnelli	MZUSP23077							2	31.67	9.56	7.91	4.95	3.9	5.31	6.56	16.1	3.6	12.53	5.19	6.46	13.24	11.27	7.48	17.98
E. macconnelli	MZUSP23079							2	30.63	9.15	7.19	5.03	3.84	5.58	6.5	15.8	3.73	12.56	5.22	6.8	12.93	10.84	7.02
E. macconnelli	MZUSP23080							3	30.98	9.49	7.44	5.05	4.02	5.44	6.44	16.64	3.41	12.62	5.25	6.65	13.47	11.2
E. macconnelli	MZUSP23081							1	26.08	7.68	6.91	4.95	3.79	4.19	5.7	13.54	3.07	11.41	4.94	5.48	11.34	9.84	7.14	14.89
E. macconnelli	MZUSP23085							2	29.41	8.62	7.31	5.24	3.93	5.07	5.97			11.87	5.37	5.97	12.22	10.69	6.88
E. macconnelli	MZUSP23086							1		8.09		4.96		4.9			3.01		5.18	5.46	11.3	10.03		14.84
E. macconnelli	MZUSP23087							1	28.04	8.26	7.09	5.23	4.01	4.59	6.14	14.52	3.25	11.41	5.13	5.86	11.89	10.2	7.59	16.26
E. macconnelli	MZUSP23088							2	29.6	8.97	7.8	5.32	4.21	5.5	6.09		3.29	12.46	5.12	5.84	12.18	10.67	7.39	17
E. macconnelli	MZUSP23093							2	27.5	8.19	7.14	5.28	4.21	4.91	5.94		3.06	12.35			11.77	9.78	6.73	16.24
E. macconnelli	MZUSP23094							1			7.33	5.08		4.87	6.21				5.25
E. macconnelli	MZUSP23095							3	30.98	9.31	7.28	5.11	3.94	5.59	6.94	15.93	3.8	12.49	5.36	6.54	13.86	10.52	7.3	17.29
E. macconnelli	MZUSP23096							4	31.41	9.76	7.37	5.07	4.09	5.59	6.63	16.66	3.84	12.61	5.26	6.53	13.72	10.88	7.37	17.85
E. macconnelli	MZUSP23097							2	30.21	9.19	7.36	5.17	3.98	5.48	6.61		4.07	12.35	5.31	6.61	12.57		7.19	17.58
E. macconnelli	MZUSP23098							2	30.1	9.3		4.91	4.16	5.21		15.15	3.73	12.25	4.98	5.81	13.29	10.56	7.07
E. macconnelli	MZUSP23099							1	27.82	8.21	6.98	4.93	3.79	4.96	6.26		3.34	12.27	5.46	5.44	11.48	10.31	7.29
E. macconnelli	MZUSP23100							3	29.9	9.24	7.22	4.86	3.73	5.15	6.46	15.7	3.8	12.1	5.01	6.57	13.07	10.9	6.85	16.32
E. macconnelli	MZUSP23101							1	28.41	8.45	7.05	5.07	3.94	4.87	6.19	15.25	3.28	12.24	4.98	5.89	12.41	10.02	7.26	16.51
E. macconnelli	MZUSP23102							2	29.56	9.11	7.71	5.15	4.03	4.76	6.35	15.02	3.72	12.12	5.05	6.3	12.65	10.45	7.13	17.11
E. macconnelli	MZUSP23105							2	31.32	9.23	7.16	5.14	4.18	5.76	6.81		3.86	12.68	5.27	6.22		11.19	7.37
E. macconnelli	MZUSP23106							2	29.73	8.95	6.96	4.88	3.74	5.41	6.17			12.18	5.03	6.29	12.53	10.77	6.99
E. macconnelli	MZUSP23109							3	31.13	9.37	8.09	5.05		5.3	6.21	15.75	3.57	12.38	5.14	6.41	13.26	10.92	7.04	16.87
E. macconnelli	MZUSP23113							1	28.59	8.57	6.72	5.06	4.18	4.87	5.98	14.73	3.21	11.82	4.58	6.12	12.06	9.75	7.45
E. macconnelli	MZUSP23126							2		8.8	7.26	5.1	3.78	4.99	6.14	15.53	3.57	11.93	4.87	6.05	12.33	10.33
E. macconnelli	MZUSP23132							2		9.68	7.88	5.28		5.09	6.44	15.92	3.59	12.22	5.01			11.27
E. macconnelli	MZUSP23140							1	29.56	9.02	7.08	4.87	4.09	5.09	6	15.41	3.45	12.22	5.07	6.19		10.39	7.02
E. macconnelli	MZUSP23142							2	28.97	8.81		4.81	3.78	4.97	6.05	15.46	3.3	12.29	5.37	6.25	12.01	10.51	6.97
E. macconnelli	MZUSP23184							2		9.54	7.59	5.03	3.96	5.47	6.51	16.26	3.96	12.42	4.96	6.42	13.39	11.04		17.85
E. macconnelli	MZUSP23204							3	31.71	9.69	7.74	5.1	3.87	5.75	6.62	16.24	4.14	12.38	5.15	6.48	13.85	10.86	7.14	17.86
E. macconnelli	MZUSP23246							2	31.85	9.54	8.21	5.07	3.71	5	6.57	16.55	3.89	12.9	5.44	6.38	14.15	11.02	7.17
E. macconnelli	MZUSP23248							1	30.53	9.2	7.71	5.13	3.69	5.13	6.69	16.53	3.78	12.09	5.25	6.52	13.13	10.85	7.46	17.65
E. macconnelli	MZUSP23252							3	31.29	9.37	7.83	5.29	3.64	5.01	6.47	16.7	3.38	12.46	5.25	6.45	13.8	11.15	7.48	17.6
E. macconnelli	MZUSP23256							2	30.22	9.14	7.77	5.13	3.64	5.27	6.34	16	3.57	12.65	5.66	6.23	13.21	11.19	7.45	17.72
E. macconnelli	MZUSP23265							2	29.32	8.52	7.1	5.11	4.12	5.9	6.5	16.34	3.75	12.52	4.96	6.4	12.67	10.82	7.2	17.49
E. macconnelli	MZUSP23274							3	31.11	9.47	8.17	5.09	3.86	5.1	6.71	17.23	4.04	13.01	5.21	6.08	13.51	11.28	7.66	18.23
E. macconnelli	MZUSP23293							2	29.96	8.89	7.9	5.08	4.12	5.04	6.19	15.75	3.67	12.14	4.97	5.9	13.14	10.58		16.67
E. macconnelli	MZUSP23300							3		8.84	7.3	5.03	4.12	5.14	6.53	15.87	3.4	12.08	4.87	5.91	12.36	10.59		16.88
E. macconnelli	MZUSP23302							1		8.74	7.75	5.09	4.52	4.97	6.41	15.93	3.32	12.6	5.01	6.34	12.81	10.67		17.3
E. macconnelli	MZUSP23332							3	30.23	9.31	7.34	5.07	3.83	5.65	6.46	16.23	3.68	12.67	4.95	6.16	12.72	11.08	7.33	17.53
E. macconnelli	MZUSP23377							2	32.09	10	7.61	5	3.81	5.89	6.66	16.69	3.74	12.87	5.62	6.51	14.33	11.44		18.36
E. macconnelli	MZUSP23379							2		9.8	8.16	5.22	3.93	4.93	6.66	16.93	4.01	12.86	5.18	6.68	12.73	12.02		18.66
E. macconnelli	MZUSP23425							4	31.41	9.57	8.08	5.03	3.64	5.06	6.67	16.93	3.85	12.59	5.55	6.9	13.73	11.57	7.48	17.93
E. macconnelli	MZUSP23428							2	28.95	8.85	7.26	4.95	3.59	4.37	6.39	15.16	3.61	11.74	5.07	6.15	12.54	10.31	6.92	15.98
E. macconnelli	MZUSP23430							1	26.32	8		4.92	3.54				3		4.83	5.47	11.14	9.54		15.13
E. macconnelli	MZUSP23431							1		7.43	6.51	5.21		4.82	5.68					5.34				15.55
E. macconnelli	MZUSP23438							2	27.85	8.21	6.99	4.89	3.82	4.74	5.94	14.65	3.27	11.86	4.77	5.55	11.88	9.96	6.65	15.85
E. macconnelli	MZUSP23441							1		7.32	7.03	5.15		4.49	5.54		2.51		4.76	4.65	10.53	9.31
E. macconnelli	MZUSP23445							2	30.91	9.42	7.89	5.32	3.89	5.5	6.5	16.17	3.46	12.56	5.51	5.41	13.38	11.03	7.61	17.59
E. macconnelli	MZUSP23446							2				5.22			6.21			11.67		5.36				17.31
E. macconnelli	MZUSP23447							3		9.32	8.08	5	4.16	5.11	6.26		3.54	11.63	4.94	6.23	13.23	10.7		17.36
E. macconnelli	MZUSP23450							2	30.67	9.4	7.76	4.94	3.8	5.46	6.35	16.55	3.84	12.29	5.16	6.93	13.61	10.81	7.18	17.57
E. macconnelli	MZUSP23451							3	31.43	9.59	7.49	5.13	3.77	5.94	6.43	15.62	3.84	12.5	5.09	6.07	13.51	11.44	6.98	17.5
E. macconnelli	MZUSP23452							3	30.96	9.24	8.35	5.28	4.15	4.69	6.5	15.97	3.48	12.63	5.15	6.73	13.43	11.07	7.69	17.48
E. macconnelli	MZUSP23454							2		9.59	8.13	5.16	3.81	5.53	6.37		3.41	12.92	5.26	5.97	13.8	11		18.08
E. macconnelli	MZUSP23455							2	31.09	9.56	8.46	5.12	3.66	5.02	6.26	16.27	3.63	12.56	5.7	6.51	13.56	10.82	7.06	17.69
E. macconnelli	MZUSP23457							2	31.74	9.47	8.04	5.36	4.28	4.92	6.55	16.05	3.9	12.24	5.26	6.42	13.62	10.78	7.26	18.07
E. macconnelli	MZUSP23458							3	30.9	9.47	8.12	5.17	4.12	4.96	6.36	16.5	4	12.65	5.13	6.99	13.55	10.68	7.59	18.07
E. macconnelli	MZUSP23459							2	32.63	9.82	8.15	4.98	4.09	5.39	6.43	16.33	4.28	12.75	5.23	7.26	14.38	11.83	7.46	18.83
E. macconnelli	MZUSP23461							3		9.86	8.13	5.06		4.97	6.42	16.09	3.73		5.27	6.62	12.93	11.36		17.86
E. macconnelli	MZUSP23464							2	31.05	9.52	7.77	4.99	4.24	5.74	6.36	16.4	3.76	12.7	5.28	6.33	14.07	11.08	7.4	17.88
E. macconnelli	MZUSP23467							0.5	23.87	6.78			3.59	4.24	5.45		2.46	10.6	4.93	5.19	9.52	9.02
E. macconnelli	MZUSP23470							1	27.46	7.74	7.34	5.51	3.53	4.38	5.98	14.05	2.99	11.45	4.87	5.42	11.99	9.7	6.86	15.06
E. macconnelli	MZUSP23475							1	26.99	7.91	6.65	5.1	3.75	4.79	5.97	14.1	3.37	11.43	5.14	5.51	11.66	9.76	6.48
E. macconnelli	MZUSP23476							1	27.92	8.09	7.15	5.27	3.96	4.68	5.95			12.07	4.97	5.7	11.84		7.45
E. macconnelli	MZUSP23477							1	28.38	8.28	7.31	5.21	4.27	4.74	5.9			11.9	5.51	5.76			7.16
E. macconnelli	MZUSP23480							2	28.99	8.78	6.86	5.08	4.89	5.45	6.09		3.16	12.22	5.15	5.74	12.34	10.16	7.25	14.5
E. russatus	MBML#196						109	3	32.54	9.32	7.07	5.24	4.5	5.26	6.68	18.6	4.53	12.89	5.59	6.44	13.75	12.2	7.42	18.1
E. russatus	UFPB-AL1412	M	254	138	32	20	51	2		8.25	5.68	4.66		5.77	5.56		3.63		4.81	5.79	12.44	11.19	6.61	16.79
E. russatus	AMNH61835	M	314	169	37			3	30.7	9.21	6.32	5.04	4.03	6.43	6.16	16.88	3.84	11.88	4.91	5.74	12.94	12.01	6.94	18.3
E. russatus	AMNH61837	M	252	134	34	14		1	27.07	7.72	6.04	5.09	3.81	5.42	5.36	15.17	3.08	11.59	5.03	5	11.49	10.5	6.44	16.38
E. russatus	CEM#49	F	286	151	30	22	76
E. russatus	CEM2963
E. russatus	CEM3717		241	116	28	23
E. russatus	CEM3719		236	110	33	22	45	2	29	8.51	5.85	4.97	4.3	6.21	6.15	16.51	3.64	12.14	5.46	6.31	12.01	10.94	6.67	17.94
E. russatus	CEM4533	F	258	140	32	22	50
E. russatus	CEM4984	F	282	151	34	23	55
E. russatus	CEM729	F	266	128	36	21		3	30.2	8.52	6.37	5	4.07	5.95	6.1	17.06	4.08	12.77	5.41	6.49	13.14	10.74	7.46	18
E. russatus	CJC2860	M	240	127	34	21.3	37.8	2	26.82	7.56	5.9	4.76	4.16	5.19	5.85	15.82	3.36	12.35	5.22	5.31	11.53	10.19	6.88	16.17
E. russatus	LV-CRB850	M	292	147	36	20	70	2	30.91	8.67	6.84	5.07	3.7	5.11	6.16	17.79	3.86	12.87	5.28	6.47	13.13	11.79	7.46	17.91
E. russatus	LV-CRB851	M	297	157	36	22	100	3	30.97	8.72	6.61	5.14	3.57	5.59	6.48	18.11	4.31	12.9	5.15	6.85	13.16	11.32	7.3	17.36
E. russatus	LV-GL30	F	270	143	37	25	60	2	30.06	8.45	6.41	5.06	4.04	5.65	6.1	16.96	3.81	12.85	5.41	5.9	12.63	11.48	7.59	16.8
E. russatus	LV-GL31	M	299	162	37	21	87	3	31.98	8.79	6.5	5.15	3.91	5.93	6.36	18.27	4.49	14.03	5.8	6.47	13.72	11.83	7.44	18.03
E. russatus	LV-GL34	F	270	137	38	25	64	3	31.25	8.53	7.05	5.17	3.77	4.98	5.99	17.62	3.94	13.06	5.39	5.77	13.46	11.93	6.54	17.23
E. russatus	LBCE311	M	296	149	33	17		3	30.5	8.59	6.96	5.01	3.9	5.36	5.89	17.01	4.18	12.85	5.43	6.63	13.31	11.97	7.55	17.63
E. russatus	LBCE313	M			34	17		3	31.98	8.96	6.92	5.25	4.12	5.82	6.11	17.89	4.06	13.2	5.61	6.89	13.51	11.96	7.66	17.43
E. russatus	UFMG-LC27	M	283	145	35	23	73	3	31.55	9.26	7.04	4.98	3.91	5.05	6.3	17.29	4.36	12.93	5.78	5.77	13.87	11.72	7.02	17.98
E. russatus	UFMG-LC30	F	294	157	34	23	84	4	32.33	9.59	7.12	5.18	3.78	6.3	6.6	18.79	4.79	13.6	5.5	6.63	13.75	11.96	7.28	19.53
E. russatus	UFMG-LC31	M	277	150	35	22	71	3	31.61	8.99	6.5	4.83	4	5.9	6.37	18.04	4.55	12.81	5.74	6.84	13.52	11.33	6.82	18.57
E. russatus	LP09		312	158	38.5	23	120	4	33.74	9.76	7.29	5.25	4.19	6.33	6.58	18.08	4.29	13.24	5.93	6.85	14.12	12.79	7.7	18.75
E. russatus	LP11	M	303	165	35.5		90	2	30.94	8.86	6.37	5.77	3.99	5.74	6.01	16.88	3.91	12.87	5.59	6.28	13.17	11.47	7.69	17.27
E. russatus	LP13	M	301	161	36.5	20	79.02	3	30.85	8.88	6.66	5.09	4.22	5.86	6.22	17.36	3.85	13.13	5.59	6.47	12.89	12.12	7.78	17.98
E. russatus	LP14	M	323	170	37	26	110.75	4	33.37	9.59	6.86	5.08	4.16	6	6.32	17.15	4.12	12.82	5.75	6.53	13.61	12.48	7.6	19.04
E. russatus	LP16	M	307	159	38	25	103	3	31.71	9.08	6.63	5.04	4.2	5.83	6.45	17.83	4.08	13.23	5.64	6.33	13.37	11.88	7.48	17.91
E. russatus	LP18							3	31.85	8.86	7.24	5.38	4.24	5.93	6.38	17.1	4.04	12.78	5.74	6.36	13.76	12.01	7.53	18.52
E. russatus	LP19	F	305	164	36	23	92	3	31.75	8.99	7.37	5.23	4.24	5.41	6.3	16.85	4.16	13.14	5.53	5.91	13.14	11.88	7.6	18.24
E. russatus	LP21	M						2	31.12	8.76	6.6	5.3	4.2	5.72	6.31	16.82	3.54	13.03	5.58	6.37	13.07	11.73	7.27
E. russatus	LP23	F	318	161	35	25	98	3	32.3	8.95	6.53	4.82	4.18	6.17	6.2	17.6	3.97	12.73	5.89	6.23	12.94	12.48	7.25	17.88
E. russatus	LP29	M	321	163	37	26	90	2	32.73	9.22	6.98	5.17	4.15	5.88	6.27	17.38	4.26	12.91	6.12	6.64	13.93	11.76	7.44	19.21
E. russatus	LP31		295	157	34.5	20.5	70	2	31.06	8.92	6.83	4.96	3.99	5.62	6.17	16.79	3.89	12.31	5.44	6.04	13	11.76	7.33	18.16
E. russatus	LP32							3	31.77	8.93	6.73	5.12	4.05	5.87	6.21	17.05	4.11	12.97	5.39	6.44	14.07	12.02	7.71	18.63
E. russatus	MNRJ-M10511	F	215	115	29	14		1	24.72	6.81	5.72	4.97	3.59	4.22	5.43		2.74	11.48	5.29	5.29	10.66	9.59	6.52	15.97
E. russatus	MNRJ-M23417	M	277	136	31	19	78
E. russatus	MNRJ-M23721	M	283	149	37	18	74	4	31.28	9.07	7.21	5.03	3.53	5.3	6.75	17.63	4.85	13.19	5.55	6.98	12.9	12.13	6.91	18.99
E. russatus	MNRJ-M23905	F	278	147	32	17	63	3	29.7	8.58	6.5	4.83	3.93	5.62	5.53	16.43	3.99	12.53	4.98	5.96	13.21	11.11	6.96	17.6
E. russatus	MACN18504	M	292	158	34	23	80	3	32.19	9.54	6.76	5.05	4.27	6.08	6.4	17.91	4.44	12.95	5.51	6.74	14.15	11.7	7.38	19.55
E. russatus	MACN18888	M	312	166	34	23	91	4	32.82	9.69	6.93	4.61	4.27	6.19	6.04	17.79	4.2	12.8	5.53	6.96	13.67	12.6	7.03	18.85
E. russatus	MACN18889	M	290	148	33	21	70	3	30.9	8.83	6.8	4.99	4.38	5.95	5.63	16.48	4.11	12.7	5.33	5.88	13.35	11.69	7.13	18.47
E. russatus	UFMG-MAM112	M	242	125	31	22		3	30.01	8.34	6.33	5.46	3.99	5.67	6.21	16.84	4.2	12.6	5.67	5.86		11.04	7.09	17.27
E. russatus	UFMG-MAM113	M	267	140	33	22		2	30.15	8.48	6.38	5.27	4.27	5.56	6.19	17.33	4.02	12.43	5.39	6.26	12.77	11.44	7.4	17.8
E. russatus	UFMG-MAM114	F	260	135	32	23		2	29.51	7.92	6.7	5.22	4.05	5.29	6.01	16.7	4.34	12.59	5.78	5.87	12.36	11.3	7.19	17.48
E. russatus	LV-MAM12							1		7.18	5.89	5.2		5.14	6.17	15.63	2.92	11.57	5.28	5.49	10.86	9.87		15.87
E. russatus	UFMG-MAM129	F	247	132	32	22		1	27.8	7.79	5.97	5.08	4.02	5.39	5.95	16.07	3.9	12.36	5.23	5.69	11.88	10.44	7.57	16.9
E. russatus	UFMG-MAM130	F	265	135	34	22		2	29.04	7.66	6.59	5.37	4.11	5.03	6.13		4.11	12.96	5.22	5.78	13	11.08	7.55	17.71
E. russatus	UFMG-MAM131	M	275	145	35	23		3	30.93	8.53	7.02	5.45	4.2	5.95	6.25	17.64	3.91	12.94	5.28	6.59	12.95	12.32	7.69	18.46
E. russatus	UFMG-MAM144	F	295	150	34	24		3	31.75	8.54	7.3	5.35	4.29	5.24	6.51	18	4.36	13.06	5.54	5.83		11.88	7.22	18.75
E. russatus	UFMG-MAM172	F	280	150	35	24		3	30.32	8.2	6.56	5.19	4.1	5.55	6.41	17.42	4.53	12.74	5.75	6	13.02	11.32	7.27	18.67
E. russatus	UFMG-MAM175	M	307	167	35	24		3	32.6	9.81	7.09	5.36	4.14	5.72	6.45	18.14	4.28	13.11	5.76	6.91		12.09	7.41	19.46
E. russatus	UFMG-MAM176	M	310	160	33	25
E. russatus	UFMG-MAM178	M	250	125	33	21		2	28.79	8.2	6.48	5.45	3.96	5.34	6.39	17.41	3.5	13.43	5.73	6.21	12	11.23	7.24	17.52
E. russatus	UFMG-MAM180	M	265	140	34	23		2	30.49	8.32	6.74	5.15	4.22	5.54	6.08	17.56	4.5	13.11	5.74	6.31	12.87	11.83	7.05	18.08
E. russatus	UFMG-MAM181	M	300	160	33	23		2	30.52	8.41	6.04	5.15	4.07	5.28	6.37		4.2	13.14	6.01	6.24	13.13	11.58	7.27	18.89
E. russatus	UFMG-MAM183	M	265	135	35	22		3	29.77	8.27	6.98	5.15	3.59	5.26	6.01	16.54	3.99	12.98	5.54	6.06	12.65	11.18	7.4	17.85
E. russatus	UFMG-MAM184	M	267	142	33	23		2	30.71	8.22	7.12	5.61	4.08	4.77	6.53	17.25	3.84	13.17	5.52	5.73		11.67	7.44	18.31
E. russatus	LV-MAM23	F	175		39	24		2	31.22	8.54	6.83	5.35	4.45	5.78	6.15	17.81	4.16	12.96	5.64	6.65	13.74	11.46	7.64	18.55
E. russatus	LV-MAM26	M						2	29.65	8.9	6.54	4.69	4.32	5.89	5.86	16.89	3.54		5.64	6.16	12.84	11.22	7.52	16.77
E. russatus	MVZ-MAM261	F	286	151	37	23	73	3		8.81	6.69	5.18		5.84	6.44		4.47		5.56	6.57	13.26	11.56		18.66
E. russatus	MVZ-MAM264	F	273	149	36	21	54	2	29.66	8.34	6.24	4.96	3.59	5.68	6.3	17.21	4	12.89	5.18	5.98	12.94	10.89	7.46	17.95
E. russatus	LV-MAM28	M	331	172	37	24	65	4	32.34	9.2	6.87	5.26	4.26	6.45	6.41	17.91	4.03	12.86	5.78	6.99	13.61	12.23	7.61	18.6
E. russatus	UFMG-MAM28	M	285	150	35	24		3	30.18	8.41	6.2	5.41	4.12	5.67	6.62	17.96	4.58	12.85	5.8	6.33	12.82	11.45	7.9	17.71
E. russatus	MVZ-MAM286	M	310	166	39	24	92	2	31.48	8.6	6.81	5.4	4.14	5.75	6.55	17.84	4.32	13.53	5.6	7.06	13.76	11.59	7.54	19.18
E. russatus	MVZ-MAM294	M	314	171	39	25	82	3	32.27	9.22	7.08	5.26	4.21	6.2	6.18	17.93	4.39	12.98	5.23	6.5	14.33	11.62	7.17	19.2
E. russatus	MVZ-MAM295	M	324	175	39	23	96	3	33.1	9.79	6.67	5.07	4.04	6.16	6.65	17.86	4.63	12.78	5.75	7.08	14.3	12.14	7.68	19.5
E. russatus	MVZ-MAM296	F	325	176	40	24	82	3	32.93	9.75	6.75	5.12	4.3	6.54	6.76	18.31	4.67	12.49	5.1	6.69	14.18	12.09	7.49	20.15
E. russatus	LV-MAM3	F		160	37	20	101	3	34.75	10.16	7.67	5.19	4.48	6.19	6.76	18.44	4.65		5.61	7.35	15.07	12.4	7.21
E. russatus	MVZ-MAM324	F	301	164	37	25	59	3	30.87	8.61	6.17	5.21	3.57	5.94	6.37	17.69	4.45	12.75	5.24	6.5	13.42	11.08	7.54	18.59
E. russatus	MVZ-MAM325	F	292	158	39	24	83	2	31.52	9.29	6.15	5.27	4.28	6.4	6.33	17.39	4.37	12.94	5.38	6.37	14.04	11.62	7.31	18.83
E. russatus	MVZ-MAM341	M	293	158	37	24	63	2	30.09	8.52	7.05	5.02	4.01	5.13	6.16	17.24	4.4	13	5.57	6.59	12.99	11.53	6.92	17.56
E. russatus	MVZ-MAM345	F	277	147	36	24	58	2	29.35	8.1	5.86	5.08	3.97	5.88	6.28	16.77	3.73	12.54	5.04	6.08	12.43	10.99	7.65	17.4
E. russatus	MVZ-MAM390	M	303	167	38	24	76	3	32.25	9.17	6.88	5.21	5.21	5.89	6.49	17.76	4.5	12.86	5.38	6.56	13.38	12.17	7.32	19.75
E. russatus	MVZ-MAM394	F	295	158	36	24	68	3	31.16	9.05	6.87	5.12	4.04	5.63	7.07	18.51	4.75	13.2	5.42	6.56	13.93	11.58	7.21	19.08
E. russatus	MVZ-MAM419	F	290	160	33	25	67	2	30	8.39	6.5	5.26	4.37	5.27	6.27	17.68	4.37	13.5	5.37	6.39	13.29	11.2	7.38	18.1
E. russatus	MVZ-MAM420	F	290	155	32	25	63	2	29.95	8.42	6.53	5.27	4.08	5.57	6.36	17.76	4.19	12.98	5.51	6.55	13.09	11.26	7.45	17.97
E. russatus	MVZ-MAM433	F	275	146	34	22	56	3	29.69	8.52	6.06	5	3.98	5.67	6.36	17.3	4.45	12.67	5.25	6.12	12.99	11.34	7.67	17.87
E. russatus	MVZ-MAM438	M	309	162	33	24	81	2	30.49	9.19	6.49	5.07	4.11	5.51	6.38	18.03	4.37	13.41	5.27	6.62	13.42	11.58	7.16	18.84
E. russatus	MVZ-MAM444	M	323	169	38	24	77	3	31.78	8.85	6.65	5.24	4.16	6.01	6.66	18.51	4.77	13.29	5.38	7.01	13.64	12.14	7.38	18.69
E. russatus	MVZ-MAM456	M	312	158	38	25	75	3	32.2	9.21	7.16	5.25	4.24	5.92	6.6	18.77	4.45	13.22	5.79	6.8	13.65	12.41	7.46	19.5
E. russatus	UFMG-MAM67	M	318	165	34	25		4	33.05	9.79	7.2	5.23		6.32	7.21	19.04	4.79	13.66	5.45	7.1	14.83	11.96	7.13	20.32
E. russatus	UFMG-MAM68	F	302	157	33	23		3	32.66	8.72	6.83	5.39	4.18	5.99	6.51	17.67	4.547	12.98	5.08	5.99	13.16	12.49	7.39	18.73
E. russatus	UFMG-MAM69	F	297	152	34	23		4	31.6	8.9	6.68	5.19	4.09	5.86	6.62	17.71	4.66	13	5.57	6.36	13.3	11.89	7.31	18.68
E. russatus	UFMG-MAM70	F	287	152	33	22		3	31.6	8.57	6.89	5.34		5.74	6.45	17.93	4.37	12.45	5.27	5.78	13.09	12.16	7.34	18.22
E. russatus	UFMG-MAM86	F	267	142	33	21		2	30.16	8.22	6.66	5.49	4.2	5.64	6.13	17.38	4.02	12.31	5.42	5.84	12.52	11.64	7.44	17.35
E. russatus	UFMG-MAM874	M	265	140	33	22
E. russatus	UFMG-MAS37	F	260	135	33	18	57	3	29.58	8.33	6.67	4.69	3.75	4.93	5.99	17.53	3.87	13.19	5.58	6.08	12.24	11.7	6.63	18.23
E. russatus	MBML01	F	280	146		22	70	1	29.55	8.08	6.34	5.21	4.06	5.37	6.13	17.03	3.89	12.89	6.16	5.59	12.13	10.96	7.54	17.36
E. russatus	MBML02	M				22	105	3	33.13	9.49	6.63	5.34	4.02	6.29	6.79		4.14	13.08	5.46	6.22	13.72	12.37	7.46	20.04
E. russatus	MBML05	M	318	172		19	97	5	32.71	9.71	6.5	4.7	3.55	5.62	6.74		4.63	13.35	5.41	6.57	13.77	12.22	7.13	20.01
E. russatus	MBML06	M				25	70	2	30.45	8.64	6.24	4.94	3.93	5.58	6.38	16.93	3.87	12.44	5.7	6.5	12.28	11	7.64	17.18
E. russatus	MBML07	M	280	154		22	82	2	30.45	8.64	6.39	5.43	3.98	5.77	6.44	17.36	3.88	12.63	5.71	6.61	12.53	11.07	7.01	18.8
E. russatus	MBML08	M	278	138		22	63	2	30.37	8.37	6.17	5.09	3.11	5.4	6.24		4.09	13.11	5.59	5.79	12.47	11.34	7.09	18.1
E. russatus	MBML105	M						3	32.14	9.14	6.82	5.2	3.7	5.63	6.46	17.55	4.11	12.69	5.15	6.29	13.42	12.35	7.28	19.17
E. russatus	MBML12	F	280	143		20	65	4	31.44	9.11	6.41	4.88	4	5.58	6.56		3.92	12.31	5.33	6.05	13.08	11.55	7.07	19.01
E. russatus	MBML13	M	216	119		20	30	0.5	24.7	7.26	5.58	4.6	3.85	4.8	5.58		3.09	11.45	5.4	5.05			7.24	13.63
E. russatus	MBML138	M	280	145	34	15	53	3	31.02	8.78	6.39	4.84	3.56	5.31	6.52	17.97	4.35	13.31	4.98	6.44	13.6	11.56	6.9	18.48
E. russatus	MBML142	F	253	140	33	20	44	2	28.63	7.87	5.79	5.01	3.84	5.4	6.28		3.73	12.68	5.75	6.36	12.17	11.04	7.04	17.87
E. russatus	MBML15	F	289	150		23	77	3	32.05	8.89	6.67	5	4.09	5.83	6.38	17.85	4.34	13.11	5.3	5.92	13.42	11.74	7.45	17.97
E. russatus	MBML16	M	313	162		23	87	3	31.64	9.18	7.33	5.24	4.38	5.82	6.87	17.95	4.14	13.11	5.71	5.99	13.26	12.13	7.84	19.08
E. russatus	MBML165	M	286	152	37	24	76	3	32.79	9.16	7.23	5.63	3.6	6.28	6.77	18.23	4.56	13.15	5.71	7.02	14.01	11.88	7.62	19.03
E. russatus	MBML179	F	305	160	33	23	80	3	30.83	8.33	6.9	5.27	3.74	4.76	6.98	17.85	3.86	13.18	5.53	6.24	12.58	10.66	7.8	17.86
E. russatus	MBML192	M	300	160	36	21	87	4	32.12	9.35	6.74	5.22	3.39	6.2	6.52	17.82	4.6	12.69	5.5	6.69	14.29	12.21	7.54	19.06
E. russatus	MBML318	M			31	17	51	1	27.65	7.59	5.79	5.07	3.33	4.94	6.06	16.1	3.52	12.33	5.51	5.94	11.38	9.92	6.98	17.07
E. russatus	MBML329							1	24.7	6.78	4.7	4.83	4.08	5.53	5.66	14.16	2.57	11.51	4.89	5.09		8.12	6.93	14.22
E. russatus	MBML386				28	16	45	3	28.23	8.13		4.8	4.44	6.26	6.43	15.87	3.48	12.15	5.15	5.73	12.58	9.38	6.94	15.47
E. russatus	MBML396							3	32.41	9.12	6.86	5.32	3.55	4.85	6.82	18.23	4.63	13.48	5.67	6.28	13.47	10.58	7.28	19.16
E. russatus	MBML50		300	155	34	21		2	31.6	9.05	6.49	5.19		5.45	6.28	17.25	4.4	12.59	5.73	6.29	13.58	11.76	7.03	18.11
E. russatus	MBML51	M	315	165	34	24	105	4	33.21	10.09	7.29			5.57		18.32	4.72	13.75	6.08	6.86	14.02	12.49	7.49	19.74
E. russatus	MBML88	M			37	15		3	34.05	9.54	6.52	5.2	4.27	6.29	6.39	18.43	4.28	13.53	5.81	6.89	14.8	12.36	7.1	20.16
E. russatus	MBML91	M	336	176	29	16	116	3	32.97	9.29	6.97	5.19	4.1	6.15	6.79	18.96	3.79	13.01	5.46	7.23	13.37	11.94	7.13	19.13
E. russatus	MHNCI1311	M	249.8	130.8	34	21.6	54
E. russatus	MHNCI1313	F	243.2	121.6	31.8	19.9	48
E. russatus	MHNCI1314	M	294.5	150.6	35.9	21.8	39	2	31.5	8.83	6.5	5.14	4.28	5.77	6.44	16.9	3.98	12.6	5.46	6.26	13.47	11.77	7.16	18.3
E. russatus	MHNCI1319	M	250.7	130	31.8	21	39	1	26.9	8.15	5.73	5.1	3.92	5.1	5.65		3.2	11.75	5.41	5.6		10.07	6.96	15.92
E. russatus	MHNCI1320							1	26.4	7.33	6.14	5.27	3.97	5.06	5.81	14.69	3.37	12.08	5.39	5.23		9.7	6.85	15.87
E. russatus	MHNCI1324							3	30.21	8.81	6.56	5.13	3.73	5.28	6.35	17.17	4.14	13.21	5.32	6.09	12.73	11.17	7.52	18.44
E. russatus	MHNCI1326	M	306.5	160	36.6	22.6	81.5	3	32.45	9.48	6.58	5.09	3.91	6.18	6.05	17.67	4.35	13.14	5.23	6.6		12.2	7.09	18.83
E. russatus	MHNCI1328							3	30.89	8.64	6.74	5.17	4.1	5.31	6.84	17.42	3.92	12.83	5.28	6.27	12.89	11.18	7.23	17.62
E. russatus	MHNCI1331							1	27.07	7.34	5.6	5.07	3.92	5.09	5.82	15.24	3.55	11.99	5.18	5.48		9.82	6.87	15.99
E. russatus	MHNCI1332	M	294	150	34.4	23.3	80	3	31.26	8.99	6.74	4.98	3.99	6.08	6.37	17.83	4.18	13.03	5.36	6.42		11.69	7.53	18.38
E. russatus	MHNCI1334							0.5	23.36	6.46	5.2	4.23	3.87	4.74	5.41		2.61	11.33	5.14	4.72		9.26	6.79	14.55
E. russatus	MHNCI1337							2	28.28	8.06	5.89	5.13	3.88	5.59	6.03		3.88	12.43	5.26	5.97	11.6	10.36	7.29	17.37
E. russatus	MHNCI1340	M						2	29.13	8.14	6.21	5.16	3.97	5.47	5.94	16.26	3.96	12.22	5.36	5.81	12.24	10.92	7.43	17.6
E. russatus	MHNCI1341	M						1	25.48	6.81	5.5	5.06	3.88	4.82	5.7	14.92	3.07	11.57	5.05	5.2	10.51	9.83	7.29	15.76
E. russatus	MHNCI1342							2	30.56	8.47	6.02	5.25	4.31	5.73	6.11	16.83	3.83	12.76	5.43	5.89	13.05	11.55	7.99	18.49
E. russatus	MHNCI1344	F	282	141	33.4	22.8	67.5	4	31.07	9.2	6.57	5.09	4.09	5.83	6.5	17.4	4.1	13.01	5.41	6.38	13.45	11.31	7.21	18.35
E. russatus	MHNCI1348							2	30.25	8.67	6.36	5.2	3.94	5.71	6.16	16.45	3.69	12.34	5.05	6.27	12.73	11.1	7.25	18.13
E. russatus	MHNCI1351							3	29.95	7.67	6.36	5.33	4.1	5.18	6.13	16.19	3.82	12.62	5.24	5.74	11.94	10.78	7.6	16.97
E. russatus	MHNCI1355							2	28.66	8.06	6.14	5.14	3.94	5.45	6.06	16.21	3.68	12.49	5	5.71	11.96	10.65	7.11	17.63
E. russatus	MHNCI1356							3	31.6	9.07	6.49	5.08		5.79	6.3	17.47	4.22	12.48	5.23	6.29	13.38	11.85	7.23	18.79
E. russatus	MHNCI1359							3	28.91	7.82	5.81	5.23	4.04	5.33	6.27	16.3	3.71	12.39	5.29	6.06	11.99	10.83	7.23	17.29
E. russatus	MHNCI1361	M	295	150.3	36	23.5	79	2	31.36	9.17	6.82	5.23	4.01	6.08	6.25	16.89	4.16	12.47	5.19	5.82	12.39	11.48	7.25	18.72
E. russatus	MHNCI1376	M						1	27.8	7.72	6.25	5.04	3.78	5.47	6.04	16.33	3.54	12.46	5.18	5.6	11.29	10.66	7.63	17.16
E. russatus	MHNCI1379	M						2	27.62	7.58	6.08	5.3	3.84	5.16	6.05	15.95	3.59	12.51	5.09	5.69	11.56	10.68	6.68	16.94
E. russatus	MHNCI1380	M						3	30.16	8.55	6	4.96	4.29	5.55	6.06	17.1	4.07	12.86	5.3	5.95	12.69	11.63	7.19	17.89
E. russatus	MHNCI1381	M	256.8	127.5	33	22	54	2	28.76	7.83	6.59	5.08	4.09	5.23	6.08	16.33	4.11	12.61	5.51	5.87	11.93	10.87	7.31	17.01
E. russatus	MHNCI1387	F	255.5	128.5	33.7	19.4	50	2	28.4	7.73	6.02	4.96	4.23	5.29	5.99	16.71	3.81	12.95	5.34	5.84	11.75	10.54	7.23	17.39
E. russatus	MHNCI1388							2	30.35	8.52	6.13	4.94	4.14	6.09	6.08	16.6	4.02	12.51	5.44	6.02	12.66	11.12	7.11	17.58
E. russatus	MHNCI1395	F	298.9	150.5	35.6	24.7	71	3	32.4	9.06	6.61	5.44	4.43	6.1	6.88	18.34	4.39	13.86	5.63	6.7	13.89	12.14	7.71	19.51
E. russatus	MHNCI1398							1	28.41	7.89	5.74	4.86	3.91	5.43	5.89	16.24	3.98	12.04	5.41	6.14	12.21	10.67	6.79	17.24
E. russatus	MHNCI1400	M						1	30.05	8.42	6.41	5.13	4.31	5.76	6.02	17.09	4.22	13.26	5.83	6.11	12.53	11.58	7.45	17.97
E. russatus	MHNCI1406	M	289	153	35.8	21.8	60	1	29.75	8.5	6.38	4.99	3.98	5.65	6.11	16.61	3.86	12.32	5.09	6.15	12.98	10.97	6.82	17.99
E. russatus	MHNCI1408	M						2	28.25	7.72	5.9	5.11	3.94	5.43	6.15	16.05	3.6	12.76	5.4	5.83	11.66	10.51	7.25	17
E. russatus	MHNCI1417	F	298.4	148.4	32.4	23	69.5	5	32.72	9.85	6.62	4.8	3.97	6.33	6.62	18.12	4.58	12.82	5.53	7	14.45	12.02	7.25	19.12
E. russatus	MHNCI1418	F	265	135.4	33.7	22	48	2	29.03	7.99	5.96	5.02	3.84	5.44	6.13	16.6	3.72	12.64	5.45	5.8	12.29	11.02	7.52	17.27
E. russatus	MHNCI1419	M	275	139.4	35	22	59	2	29.99	8.54	6.07	5.14	3.84	5.63	6.1	16.62	4.24	12.61	5.81	6.22	12.81	10.95	7.06	18.13
E. russatus	MHNCI1420	M	289.4	149.4	35.4	23.8	69	2	31.8	8.56	6.85	5.29	3.88	5.56	6.3	17.21	4.61	12.99	5.36	6.45	13.73	11.48	7.13	18.78
E. russatus	MHNCI1429	M	269.4	144.2	35	22.8	51	2	29.98	9.51	6.36	5.12	3.81	5.67	6.3	17.26	4.44	13.05	5.27	6.27	12.63	11.13	7.44	18.55
E. russatus	MHNCI1431	M	284.2	147.2	34.8	22	54	2	30.62	8.66	6.02	5.21	3.94	5.92	6.44	17.91	4.4	13.12	5.57	6.77	13.27	11.55	7.41	18.84
E. russatus	MHNCI1432	F	245.3	128.3	32	22.3	40	2	27.73	7.64	5.89	5.22	3.91	5.34	6.05	16.19	3.95	12.51	5.65	5.65	12.02	10.57	6.86
E. russatus	MHNCI1437	M	250	128	34	22	39	2	27.99	7.74	6.15	5.21	3.86	5.35	6.09	16.35	3.49	12.9	5.5	5.78	11.88	10.68	7.31	17
E. russatus	MHNCI1439	M	270.5	138.5	35.4	23	63	2	31.74	8.97	6.43	5.04	4.02	5.99	6.2	18.01	4.39	12.94	5.42	6.41	13.9	11.72	7.06	18.97
E. russatus	MHNCI1440	M	252.9	135.9	35.3	22.3	52	2	29.48	8.35	6.27	5.31	4.64	5.8	6.25	17.02	3.91	12.58	5.36	5.92	12.37	11.28	7.02	17.68
E. russatus	MHNCI1443							2	30.44	8.65	6.55	5.21	3.94	5.83	6.2	17.05	4.45	12.8	5.41	6.33	12.98	11.23	7.16	18.03
E. russatus	MHNCI1450	M	309.7	158.5	37.5	22.8	77	2	32.01	8.96	7.13	5.4	4.12	5.88	6.6	18.06	4.29	13.17	5.5	6.9	14.11	11.91	7.36	18.78
E. russatus	MHNCI1453	F	247	131	33	23.5	54	2	29.95	8.4	6.27	5.21	4.02	5.5	6.48	16.98	3.77	12.62	5.41	5.99	12.42	10.88	7.4	18.03
E. russatus	MHNCI1455	F			34.5	24	53	2	30.67	8.84	6.12	5.2	3.89	5.87	6.3	17.03	4.4	12.64	5.68	6.09	13.26	11.52	7.3	18.58
E. russatus	MHNCI1456	F	257.3	135.5	34.6	22.6	52	3	30.23	8.5	6.55	5.19	3.79	5.74	6.48	17.05	4.35	12.63	5.47	5.99	12.37	11.33	7.24	17.75
E. russatus	MHNCI1457							2	29.75	8.33	6.48	5.34	4.1	5.46	6.34	17.1	4.37	12.65	5.43	5.95	12.41	11.36	7.09	18.52
E. russatus	MHNCI1474							3	32.09	9.16	6.59	5.31	4.09	6.21	6.44	17.82	4.68	13	5.5	6.43	14.28	11.51	7.42	19.05
E. russatus	MHNCI1477							4	31.89	9.17	6.61	5.33	4.03	5.91	6.51	17.31	4.13	12.64	5.27	6.48	13.75	11.65	6.64	18.45
E. russatus	MHNCI1478							1	27.5	7.86	6.07	5.01	3.91	5.25	6.09	16.18	3.46	12.33	5.4	5.31	11.55	10.5	6.96	16.96
E. russatus	MHNCI1480							3	32.51	9.48	6.4	5.39	4.29	5.88	6.29	17.75	4.59	12.78	5.42	6.38	13.94	11.73	7.38	18.79
E. russatus	MHNCI1483							2	29.99	8.2	5.92	5.13	4.15	5.16	6.36	17.12	3.98	12.88	5.53	6.16	12.43	11.06	7.4	17.43
E. russatus	MHNCI1484	M	281.3	137.5	36.7	24.2	56	3	31.2	9.02	6.7	5.28	3.86	6.06	6.59	17.66	3.97	12.39	5.15	6.2	13.34	11.29	7.27	18.68
E. russatus	MHNCI1496	F	286.7	145.2	34.4	22.8	62	2	30.45	8.25	6.32	5.54	4.16	5.76	6.48	17.52	3.91	12.78	5.47	6.36	12.81	11.24	7.12	18.28
E. russatus	MHNCI1501	F	280	140	35.3	23.6	61	2	31.27	8.79	6.59	5.2	4.07	5.65	6.3	17.79	4.39	13.07	5.32	6.14	13.54	11.07	7.3	19.04
E. russatus	MHNCI1514	M	284.8	150	35.4	22	53	2	29.85	8.44	6.51	5.4	4.01	5.75	6.1	16.69	4.04	12.31	5.07	6.13	13.09	11.01	7.1	18.51
E. russatus	MHNCI1520	F	242.7	127.2	32	20	40	1	27.22	7.53	6.11	5.18	3.98	5.37	5.96	16.28	3.24	12.45	5.2	5.49	11.28	10.23	7	16.89
E. russatus	MHNCI1534	M	281.6	139.6	34.5	22.8	58.5	2	31.06	8.96	6.45	5.21	3.89	5.81	6.29	17.66	4.34	12.81	5.31	6.43	13.37	11.7	7.41	18.37
E. russatus	MHNCI1539	M	284.8	144.3	35.4	23.3	69	2	30.6	8.48	6.25	5.42	3.83	5.91	6.3	17.66	4.33	12.97	5.43	6.18	12.79	11.62	7.52	18.25
E. russatus	MHNCI1543	M	313	162	36.3	24.4	82.5	3	32.28	9.36	6.88	5.36	3.98	6.39	6.6	18.18	4.65	13.21	5.72	6.81	13.88	11.85	7.33	18.87
E. russatus	MHNCI1554	F			34.8	23.5	84	3	31.57	8.8	6.52	5.33	4.05	5.86	6.41	17.47	4.33	12.86	5.3	6.34	13.56	11.31	7.45	18.95
E. russatus	MHNCI1555	F	281.3	146.3	33.2	23.4	50	2	30.38	8.58	6.05	5.03	4.08	6.16	6.19	16.95	3.92	12.43	5.22	6.28	12.82	11.08	6.9	17.73
E. russatus	MHNCI1557	M	291.2	157	35	23	59	2	29.92	8.2	6.37	5.31	4.04	5.57	6.22	17.46	4.03	12.8	5.77	6.12	12.75	10.8	7.54	18.08
E. russatus	MHNCI1560	M	303.5	156	35.3	22.4	70	2	31.86	8.89	6.63	5.45	4.08	5.87	6.3	17.51	4.22	12.84	5.29	6.35	13.55	11.54	7.24	18.7
E. russatus	MHNCI1567	M	287	147	36.2	22.5	80	2	30.12	8.37	6.53	5.43	4.19	5.47	6.42	17.57	4.05	13.07	5.36	6.21	13.05	11.2	7.17	17.81
E. russatus	MHNCI1569	M	284	142.6	33.8	22	77	3	31.07	8.96	6.27	5.07	4.16	6.21	6.51	17.67	3.94	12.78	5.63	6.23	13.06	11.6	7.05	18.75
E. russatus	MHNCI1575	M	291	147	35.2	23.7	76	2	31.11	9.04	6.73	5.44	4.08	5.76	6.55	17.69	4.4	12.78	5.32	6.33	13.72	11.37	7.82	19.18
E. russatus	MHNCI1579	M	287.6	148	34	21.8	68.5	4	31.41	9.48	6.78	5.19	4.16	6.4	6.51	17.83	4.26	13.11	5.82	6.44	14.02	11.6	7.2	17.85
E. russatus	MHNCI1580	F	289.8	148.3	35.2	24	65.5	3	31.27	8.62	6.49	5.41	3.8	5.44	6.45	17.5	4.33	12.63	5.51	6.36	13.05	11.23	7.37	18.72
E. russatus	MHNCI1584	F	173.2	89.2	26.8	17.5	15	0.5	21.75	5.9	4.85	4.11	3.84	4.29	5.4	12.14	2.46	11.11	5.05	4.55	8.89	8.45	6.07	13.69
E. russatus	MHNCI1591	M	312.5	163	36.3	24.7	84
E. russatus	MHNCI1592	F	294.9	151.2	33.8	23	73	3	31.59	8.81	6.62	5.37	4.31	5.92	6.36	17.91	4.66	12.82	5.61	6.53	13.74	11.73	7.35	18.71
E. russatus	MHNCI1594	F	229	117.6	30	19	37	1	26.21	7.19	5.39	5.2	4.37	4.9	5.95	15.09	3.16	12.39	5.2	5.37	10.58	10.04	6.89	16.3
E. russatus	MHNCI1596	F	259.4	131	31	21.5	55.5	2	28.75	8.03	6.27	5.19	4.13	5.17	6.13	16.13	3.65	12.69	5.45	5.57	11.88	10.77	7.41	17
E. russatus	MHNCI1598	M	283.9	145.3	34.8	23.8	30
E. russatus	MHNCI1599	M	285.7	149.4	35.3	22.6	63	2	30.57	8.63	6.57	5.31	4.09	5.7	6.16	17.46	3.91	12.92	5.77	6.26	13.14	11.21	7.35	18.19
E. russatus	MHNCI1600	F	294.4	149.4	35	23.7	105	3	31.29	8.89	6.69	5.26	4.11	6.19	6.24	17.71	4.34	12.7	5.49	6.58	13.87	11.77	7.39	18.85
E. russatus	MHNCI1601	M	246.3	129.3	31.8	20	42.5	1	27.1	7.24	5.99	5.26	3.85	5.21	5.76	14.8	3.18	12.52	5.1	5.07	10.97	10.25	7.25	16.7
E. russatus	MHNCI1603	M	299.3	152	36	22	78.5	3	31.21	8.89	6.85	5.38	3.97	5.94	6.45	17.83	4.38	13.09	5.49	6.47	12.93	11.78	7.66	18.26
E. russatus	MHNCI1604	F	267.6	141	31.6	22	58.5	1	28.32	7.54	5.99	5.19	3.61	5.28	5.76	15.92	3.43	12.34	5.24	5.66	11.72	10.71	7.02	17.06
E. russatus	MHNCI1606	F	237.6	126.9	32.7	21	40	1	27.43	7.51	6	5.35	3.91	5.51	5.96	15.84	3.43	12.91	5.3	5.86	11.75	10.67	6.92	16.77
E. russatus	MHNCI1610	M	279.6	145.6	35.8	21.2	65	3	29.89	8.64	6.56	5.26	4.07	6.02	6.2	16.94	4.26	13.07	5.58	5.84	12.48	11.11	7.34	17.62
E. russatus	MHNCI1615		275.5	142.3	35.4	21	68
E. russatus	MHNCI1616	M	206.7	108.8	30.3	20	31	0.5	24.55	6.91	5.09	4.91	3.99	4.88	5.58	14.94	2.79	12.57	5.26	5.33	9.98	9.62	6.79	15.33
E. russatus	MHNCI1617	F	269.3	138	30.2	20.6	50
E. russatus	MHNCI1619		271.6	143	34.4	23	58	2	28.94	8.14	6.2	5.58	4.21	5.39	6.34	16.6	3.99	13.09	5.19	5.84	12.54	11.06	7.57	17.72
E. russatus	MHNCI1621	M	253.5	129	33.2	21.8	50	1	28.28	7.92	5.69	5.19	4.06	5.41	6.08	16.4	3.57	12.74	5.27	5.88	11.71	10.71	7.09	16.68
E. russatus	MHNCI1623	M	280	143.8	35.3	21	70
E. russatus	MHNCI1629	M	274.6	145.8	34.8	23.6	60	2	29.43	8.45	5.7	5.21	4.21	5.54	6.02		3.61	12.82	5.36	5.93	11.99	11.04	7.1	17.73
E. russatus	MHNCI1632	M	274.6	145.8	34.8	23.6	60
E. russatus	MHNCI1636	M	308	160	35.2	23.7	63
E. russatus	MHNCI1637	F	265.4	136.8	34.7	21.8	57
E. russatus	MHNCI1638		250	135	36	22.8	50	2	29.89	8.03	5.71	5.02	4.1	5.29	6.34	16.69	3.98	12.65	5.51	5.5	12.4	11.02	7.44	17.2
E. russatus	MHNCI1640	F	270	140	34.5	21	56	3	30.48	8.57	6.64	5.1	3.91	5.75	6.31	16.7	3.79	12.6	5.26	5.93	12.96	11.12	6.95	17.96
E. russatus	MHNCI1641	M	291.2	150.7	34.6	21.5	71
E. russatus	MHNCI1644	F	206.4	104.8	29.2	19.3	26	0.5	24.32	6.73	5.41	4.97	3.68	4.55	5.43	14.15	2.73	11.56	5.15	5.17	10.2	9.49	6.79	14.95
E. russatus	MHNCI1648	M	235.6	119.6	32.4	20.3	36	1	26.82	7.45	5.45	5.1	4.02	5.07	5.73	15.4	3.56	12.1	5.04	5.5	11.15	10.14	6.87	16.01
E. russatus	MHNCI1650	M	297	154	36.2	22.8	71	3	30.81	8.87	6.6	5.2	3.99	5.9	6.23	16.96	4.2	13	5.52	6.11	12.81	11.55	7.36	18.69
E. russatus	MHNCI1651	F	276.9	143	32.8	20.9	59	2	30.57	8.54	5.88	4.91	4.19	5.82	6.35	16.84	4.11	12.52	5.72	6.49	13.26	11.12	7.21	17.72
E. russatus	MHNCI1652	M	265.2	139	33.8	22	45	1	28.6	7.71	6.13	5.28	4.17	5.39	6	16.62	3.59	12.47	5.34	5.97	12.16	10.51	7.43	17.29
E. russatus	MHNCI1656							3	31.21	8.71	6.09	5.17	4.17	5.61	6.62	17.64	4.09	13.24	5.2	6.45	12.91	11.36	7.48	18.46
E. russatus	MHNCI1659	F	285.2	146.5	33.6	23.8	67	2	30.87	8.84	6.49	5.1	4.33	5.54	6.41	17.46	4.06	12.61	5.4	6.05	13.44	11.7	7.05	18.68
E. russatus	MHNCI1663	M		150	34.4	22.7	55.5	2	30.89	8.64	6.58	5.29	4.08	5.46	6.17	17.11	4.33	12.21	5.53	6.24	12.88	11.16	6.86	18.57
E. russatus	MHNCI1664							0.5	23.52	6.3	5.54	4.12	3.84	4.54	5.58	13.74	2.49	11.4	5.07	5.03	9.49	9.18	6.92	14.65
E. russatus	MHNCI1665							2	29.9	8.42	5.82	5.25	4.04	5.74	6.02	16.58	4.2	12.71	6.31	6.26	12.79	11.03	7.14	18.27
E. russatus	MHNCI2005	M	259	135	34	23	54.5	1	27.74	7.81	6.43	5.23	3.91	5.22	5.64	14.87	3.29	12.16	5.73	6.24	11.62	10.47	7.02	16.62
E. russatus	MHNCI2431	F	285	150	36	24	33	3	31.28	8.79	6.34	5.17	4.15	6.25	6.34	17.06	4.2	11.97	5.4	6.04	14.39	11.93	7.17	18.48
E. russatus	MHNCI2446	M	208	106	30.5	21	28.5	1	25.06	7.13	5.88	4.91		4.66	5.57		2.97		4.95	5.11	10.16	9.29	6.48
E. russatus	UFMG-MF29	M	284	146	30	18	65	2	29.91	8.54	7.13	5.04	3.75	5.36	6.05	16.77	4.01	12.94	5.9	6.22	11.57	10.89	6.8	18.63
E. russatus	MNRJ11231	F	295	144	36	20	100	3	31.52	8.74	6.58	5.04	3.87	5.85	6.26	17.72	4.2	12.8	5.75	5.89	14.53	11.83	7.05	18.69
E. russatus	MNRJ11647	M	290	150	36	19	76	3	31.17	8.79	7.36	5.17	3.97	5.59	6.44		4.41	12.69	5.32	6.09		12.01	7.28	18.49
E. russatus	MNRJ11725	F	270	140	33	20	60	2		9.14	6.87	5.45		5.12	5.97		3.62		5.12	5.75	12.21			17.77
E. russatus	MNRJ11726	F	265	140	33	19	51	1		7.79	6.75	5.06		4.95	5.76	15.67	3.79		4.84	5.58	11.87	10.88		17.55
E. russatus	MNRJ11727	F	280	140	35	18	63
E. russatus	MNRJ11729	F	250	120	32	20	61
E. russatus	MNRJ11911	M	210	115	29	17	24
E. russatus	MNRJ24074	M	339	180	35	24	100	5	34.25	9.84	7.46			6.51			4.64		6.09	6.79	14.17	13.5		19.08
E. russatus	MNRJ24075	M	300	162	28	22	110	5	32.96	9.39	6.9	5.18	4.19	6.18	6.58	18.48	4.14	13.25	6.04	6.48	13.91	12.58	7.94	18.14
E. russatus	MNRJ24364	M	150		30	20	50	3		9.23	6.87	5.1		5.95	5.56	16.73	3.9	11.37	5.85	5.73	12.6	12.32	7.4	17.98
E. russatus	MNRJ24370	F	302	162	38	22	110	3	32.49	9.23	6.28	5.13	4.05	5.7	6.26	17.6	4.21	12.98	5.56	6.3	13.55	12.09	7.91	18.42
E. russatus	MNRJ24373	M	326	160	38		100	5	34.36	9.7	7.16	5.18		6.57	6.74	18.56	4.67		6.24	6.72	14.43	12.88	8.01	19.16
E. russatus	MNRJ24374	M	180		32	22	100
E. russatus	MNRJ24375	M	312	159	33	22	75	3	32.56	9.21	6.74	5.08		6.45	6.27	17.67	4.3	13.12	5.66	6.16	13.54	12.16	7.81	18.07
E. russatus	MNRJ24390	F	301	161	32	20	100	3		9.23	6.89	5.32		5.94	6.24	17.48	3.82		5.7	6.01	13.11	12.64	7.22	17.84
E. russatus	MNRJ24391	F	257	141	31	21	60	2	29.5	8.18	6.38	5.1	4.22	5.43	5.74	15.8	3.49	12.15	5.59	5.68	12.4	11.08	7.07	17.33
E. russatus	MNRJ24392	M	265	130	32	20	50	2	27.67	7.52	6.09	5.08	4.34	5.27	5.99	15.87	3.37	12.39	5.56	5.38	11.52	10.44	7.54	16.05
E. russatus	MNRJ24413	M	325	173	35	25		5	32.4	9.57	6.76		4.96	5.97	6.56	19.13	4.86	13.97	5.89	7.11	14.12	11.56	7.54	19.33
E. russatus	MNRJ24415	F	225	118	32	21		2	26.41	7.51	5.62	4.89	4.2	5.16	6.02	15.4	3.19	12.14	5.16	5.33	10.97	10.37	6.86	16.54
E. russatus	MNRJ24417	M	290	153	36	22		1	30.85	9.21	6.43	5.06	4.43	5.72	6.18	16.93	4.13	12.47	5.1	6.18	13.27	10.98	7.44	17.91
E. russatus	MNRJ24441	M	257	130	35	22		3	28.21	7.77	5.9	4.9	4.02	5	6.03	16.84	3.9	12.31	5.1	5.93	11.88	10.65	7.23	16.22
E. russatus	MNRJ24537	M			35	20	100	3	33.16	10.03	6.99	5.16	4.06	5.58	5.97	18.4	3.81	13.48	5.91	7.31	15.15	11.61	7.7	19.97
E. russatus	MNRJ24538	M	255	125	37	19	80	5	32.08	9.55	6.92	5.37	3.87	5.69	6.35	18.45	4.36	13.01	5.47	7.05	13.31	13.14	7.74	19.44
E. russatus	MNRJ24539	F	289	140	35	21	60
E. russatus	MNRJ24540	M	310	155	36	19	55	3		9.51		4.98		6.36			4.33		5.88	6.37	14.95			20.42
E. russatus	MNRJ24541	M			34	19
E. russatus	MNRJ25030	M			38	24	96	3	33.13	9.29	7.1	5.34	4.33	6.13	6.56	18.82	5.04	13.53	5.51	7.22	14.01	12.73	7.75	18.46
E. russatus	MNRJ30597	F	265	130	32	22	62	2	28.06	8.21	6.36	4.86	4.03	5.51	5.8	15.42	3.53	12.36	5.4	5.81	12.28	10.52	7.14	16.72
E. russatus	MNRJ31410	M	304	148	36	23	78	2	32.21	9.35	6.71	5.27	4.33	6.42	6.23		4.09	12.64	5.44	5.93	13.77	12.28	7.26	18.48
E. russatus	MNRJ31411	F	308	160	36	24	95	2	32.71	9.34	7.17	5.23	4.18	6.1	6.21	18.47	4.29	13.68	5.75	6.25	14.52	12.58	7.66	19.31
E. russatus	MNRJ32449	F				21		2	27.35	8.13		4.51	4.64	5.96	5.69	15.59	3.17	12.22	5.28	5.79		9.38	7.53	14.73
E. russatus	MNRJ32460	M	300	150	37	15	73
E. russatus	MNRJ32461	F	258	128	33	17	57
E. russatus	MNRJ32463		274	133	33	23	77
E. russatus	MNRJ32466	F	263	138	30	17	68
E. russatus	MNRJ32674	M	290	158	34	20
E. russatus	MNRJ32675	F	239	123	31	21
E. russatus	MNRJ32678							2		8.4	6.23	5.16		5.84		17.36	3.72	13.1	5.71	5.92	12.2	11.54		19.93
E. russatus	MNRJ32736	F	300	145	33	19	55	5	31.64	9.06	6.99	5.43	4.44	5.54	6.76	18.59	4.48	12.83	5.53	7.13	13.77	11.78	7.9	18.53
E. russatus	MNRJ32740	M	283	150	35	20		3	31.75	8.88	6.71	5.1	4.57	5.67	6.22	17.84	4.26	13.29	5.83	6.76	13.57	11.53	7.6	18.3
E. russatus	MNRJ32741	M	276	146	35	23		3	32.63	9.32	6.97	5.2	3.61	5.51	6.55	18.77	4.53	13.04	5.53	7.24	14.29	12.51	7.89	19.02
E. russatus	MNRJ32742	M	288	153	35	22		2	31.53	9.07	7.29	5.24	4.26	5.28	6.38	18.49	4.32	13.42	5.83	6.43	13.38	12.01	7.38	18.45
E. russatus	MNRJ32751	F	255	130	34	20	57	1		7.71	5.92	4.84		5.04	5.05		3.75		5.3	5.25	10.81			16.06
E. russatus	MNRJ32752	F	315	170	34	19	66
E. russatus	MNRJ32753	F	295	150		23	65	3		9.13	6.66	5.13	3.86	5.59	6.35	17.43	4.39	12.37	5.35	6.46	13.27	11.76		19.07
E. russatus	MNRJ32754	M	340	183	36	19	116
E. russatus	MNRJ32755	M	301	156	37	24	76
E. russatus	MNRJ32756	M	280	150	35	19	61	2	28.91	7.91	6.11	5.39	4.05	5.58	5.81	15.86	4.21	12.47	5.15	6	11.92	11.85	7.13	17.19
E. russatus	MNRJ32757	F	330	175	35	20	103	4	32.94	9.56	7.51	5.42	3.29	6.19	6.83		4.11	12.82	5.2	6.69	13.81	12.41		19.01
E. russatus	MNRJ32758	F	290	150	35	20	90	3	31.48	8.76	6.85	5.15	4	5.49	6.48	17.67	4.95	13.01	5.5	6.35	13.34	12.03	7.56	19.14
E. russatus	MNRJ32759	M	300	160	36	24	74	3	30.17	9.09	7.02	5.4	3.87	5.36	6.28		4.5	12.71	5.41	5.99	12.97	11.72	7.34	20.2
E. russatus	MNRJ32760	F	270	135	34	20	62	2	29.62		6.9	4.93	4.32	5.87	6		3.84	12.19	4.96	5.83		10.62	7.17	17.29
E. russatus	MNRJ32761		292	152	33	18	62	2	30.54	9.05	6.92	5.28	3.2	5.68	5.98		4.44	12.39	5.34	6.43	12.94	11.61	7.09	17.79
E. russatus	MNRJ32762	F	300	160	35	19	85
E. russatus	MNRJ32763	F	250	125	32	21	46	1	26.43	7.76	6.35	5.08	3.57	4.96	5.74	14.74	3.45	12.3	5.19	5.28	11.15	10.56	6.96	16.45
E. russatus	MNRJ32764	M	270	142	33			3	29.87	8.96	6.42	4.92	4.1	5.7	6.07	17.08	4.03	12.85	5.82	5.98	11.99	11.56	7.46	17.78
E. russatus	MNRJ32765	M	288	148	35	23	66	2	30.04	8.55	6.44	4.87	4.24	5.54	6.34	17.29	4.07	13.19	5.06	6.16	12.54	11.28	7.37	18.76
E. russatus	MNRJ32766	F	297	150	37	23	78	3	31.47	8.97	6.98	5.26	3.59	5.12	6.13	17.17	4.2	12.99	5.07	6.11	13.49	11.82	6.73	18.48
E. russatus	MNRJ32767	F	224	108	31	19	33	1	25.62	7.14	5.66	4.91	4.06	4.92	5.74	15.35	3.32	12.07	5.23	5.05	10.18	10.05	6.59	15.44
E. russatus	MNRJ32768	M	246	124	34	22	52	3	28.26	7.98	6.52	5.25	3.91	5.16	6.16	16.58	3.63	12.8	5.07	5.71	11.79	10.88	7.1	16.62
E. russatus	MNRJ32769	M	233	116	35	20	41	2	26.61	7.57	6.23	5.14	3.38	5.02	5.82	15.6	3.65	12.43	5.32	5.49	11.29	10.37	6.8	16.23
E. russatus	MNRJ32770	M			27	19	49
E. russatus	MNRJ32771	M	199	97	30	21	26
E. russatus	MNRJ32772	F				21	53
E. russatus	MNRJ32773	M			28	21	73
E. russatus	MNRJ32774	F	296	142	34	24	98	4	32.07	9.44	7.13	5.06	3.82	6.38	6.58	18.46	4.36	12.8	5.44	6.16	13.13	12.81	7.55	19.18
E. russatus	MNRJ32775	M	221	112	31	21	37	1	25.07	7	5.63	4.99	3.81	4.12	5.44	14.45	3.09	11.88	4.92	5.34	9.84	9.92	6.57	14.64
E. russatus	MNRJ32776	M			32	22	60	2	28.35	7.87	6.2	4.87	3.84	4.67	5.81	15.05	3.79	12.05	5.35	5.51	12.55	9.82	6.75	16.65
E. russatus	MNRJ32777	M			28	19	32
E. russatus	MNRJ32778	M	207	99	31	21	31	1		6.69	5.37	4.85		4.56		13.94	2.76	11.55	5.12	4.96	9.73	9.69
E. russatus	MNRJ32779	M	280	142	36	23	71	2	30.65	8.92	6.88	5.34	3.81	5.76	6.47	17.24	4.02	12.81	5.36	5.7	13.46	11.53	7.47	17.89
E. russatus	MNRJ32780	F	292	148	38	24	61	3	30.79	8.87	6.99	5.48	3.22	5.59	6.29	16.82	3.75	12.71	5.22	5.92	12.97	11.39	7.1	18.65
E. russatus	MNRJ32781	M	239	115	33	21	53
E. russatus	MNRJ32782	M	197	100	30	20	23	0.5	24.42	6.6	5.73	5.01	3.68	4.31	5.44	14.14	2.49	11.45	5.2	4.87	9.83	9.38	7.23	14.69
E. russatus	MNRJ32783	M	277	142	38	21	65	3	29.75	8.19	6.85	5.3	3.92	5.44	6.18	17.22	3.67	13.3	6.18	6.05	11.93	11.08	7.51	17.91
E. russatus	MNRJ32785	M	305	147	36	25		5	33.08	9.61	7.27	5.25	3.7	5.79	6.81	18.93	4.14	13.36	5.69	7.45	14.29	11.98	7.75	19.99
E. russatus	MNRJ32786	F	272	132	33	22	86	4	31.09	9.11	6.17	5.09	3.95	5.72	6.26	17.71	4.17	12.73	5.6	6.17	13.28	11.44	6.96	18.58
E. russatus	MNRJ32787	F	316	153	36	24	125	4	32.06	9.42	7.27	5.13	3.83	5.76	6.37	17.95	4.32	13.09	5.41	6.04	13.81	11.47	7.54	19.17
E. russatus	MNRJ32788	M	233	114	36	21	46	2	27.85	7.49	6.38	4.96	3.49	5.14	6.05	16.71	3.79	12.77	5.22	5.72	11.37	11.01	7	16.62
E. russatus	MNRJ32789	M	231	120	34	22	40	1	26.08	7.17	6.36	4.92	3.49	4.05	5.65	14.78	2.94	11.72	5.52	4.92	11.14	10.07	6.81	15.83
E. russatus	MNRJ32790	M			32	20	39	1	25.21	7.22	5.39	5.09	3.48	4.77	6.13		3.27	12.47	5.32	5.03	10.46	9.92	6.55	16.16
E. russatus	MNRJ32791	M	271	135	36	23	49	3	29.28	9	6.82	4.83	3.69	4.95	5.42	16.89	3.64	12.33	5.74	5.51	12.67	10.9	7.13	17.3
E. russatus	MNRJ32792	M	293	143	38	22	64	3	30.96	8.99	6.38	5.51	4	5.93	6.4	18.09	4.54	12.91	5.61	6.48	13.68	11.41	7.37	17.93
E. russatus	MNRJ32793	M	209	106	32	21	30	1		7.01	5.59	4.9	4	4.64	5.64	15	2.8	11.85	5.27	5.28	10.75	8.68	6.67	15.46
E. russatus	MNRJ32794	F			36		75	4	31.53	9.04	7.04	5.1	4.11	5.61	6.23	17.71	4.26	12.74	5.16	6.06	13.77	11.68	6.81	19.26
E. russatus	MNRJ32795	M	221	106	32	20		2	25.66	6.97	5.62	4.98	4.17	4.51	5.17	15	3.21	12.51	5.46	5.18	10.56	10.03	7.24	16.01
E. russatus	MNRJ32796	M	256	128	35	21	49	2	27.83	7.74	6.04	5.24	3.73	4.56	5.76	15.61	3.33	12.44	5.52	5.03	11.06	10.73	7	17.14
E. russatus	MNRJ32797	M			38	25	88	3	31.88	9.42	7.16	5.12	4.04	6.28	6.23	17.8	3.86	12.92	5.7	5.76	13.76	11.64	7.23	18.29
E. russatus	MNRJ32798	F	201	107	32	20	37	1	24.62	6.81	5.96	5.13	3.51	4.52	5.42	14.71	2.74	11.97	4.62	5	9.91	9.45	6.61	15.06
E. russatus	MNRJ32799	F	285	142	36	24	71	3	31.61	9.1	7.27	5.23	4.07	5.36	6.14	17.2	3.9	12.46	5.4	6.13	13.66	11.6	7.16	18.89
E. russatus	MNRJ32800	M	201	97	31	20	31	1	25	6.76	5.27	4.9	3.73	4.44	5.57	14.54	3.5	11.64	5.17	5.02	9.81	9.55	6.59	15.33
E. russatus	MNRJ32801	M	199	104	30	20	26	0.5	24.28	6.66	5.64	4.88	3.94	4.17	5.48	14.11	2.71	11.22	4.94	4.86	9.45	9.14	6.45	14.67
E. russatus	MNRJ32802	M	304	157	37	25	82	4	33.4	9.98	7.26	5.36	4.13	6.03	6.55	18.69	4.51	12.86	6.14	6.41	14.46	12.11	7.46	19.72
E. russatus	MNRJ32803	F	250	125	31	21	45	3	27.98	8.14	6.52	4.67	3.64	5.19	5.99	15.77	3.21	12.18	5.39	5.03	11.7	10.65	6.64	17.04
E. russatus	MNRJ32804	M	299	160	35	22	64	3		8.82	6.84	4.9	3.67	5.61	6.49	18.18	4.56	12.76	5.65	6.31	12.79	11.27		18.96
E. russatus	MNRJ32805	M	304	160	38	23	57	3	31.11	8.54	6.62	5.37	3.63	5.53	6.26		4.22	12.71	5.35	6.07	13.51	11.64	7.18	18.37
E. russatus	MNRJ32806	M	267	133	36	22	63	2		7.4	6.26	5.21		5.13	5.37	16.42	3.51	12.07	5.63	5.96	11.22	10.57		16.76
E. russatus	MNRJ32807	M	216	109	31	19	30	1	25.12	6.81	5.48	5.08	3.68	4.49	5.55	14.35	3.11	11.35	5.08	5.25	10.45	9.69	7	15.56
E. russatus	MNRJ32808	F	282	134	33	24		3	31.46	9.11	6.86	5.46	3.92	4.8	6.5	18.03	4.24	12.86	5.2	6.56	13.03	11.69	6.9	18.83
E. russatus	MNRJ32809	F	245	119	36		48	2		7.46	5.83	5.52		4.87	5.67	15.67	3.5		5.34	5.39	11.22	10.35		16.57
E. russatus	MNRJ32810	M	312	162	34	25		3	32.86	8.99	6.87	5.55	3.63	6.04	6.73	18.53	4.64	13.43	5.63	6.46	13.71	11.75	7.41	18.23
E. russatus	MNRJ32811	M	280	143	35	24	74	4	31.6	8.96	6.95	5.4	3.74	6.11	6.65	18.2	4.34	13.06	5.25	6.57	13.29	11.33	7.32	19.13
E. russatus	MNRJ32812	M				18		3	31.55	8.53	6.74	5.17	4.4	5.43	6.44		4.7	13.08	5.26	6.37	13.78	11.54	7.6	18.94
E. russatus	MNRJ32813	F			34	25		4	32.25	8.91	6.7	5.35	4.3	6.33	6.97		3.92	13.19	5.36		13.15	12.14	7.16	18.18
E. russatus	MNRJ32814	F	253	128	33	21	42	2	28.24	7.76	6.47	5.15	3.76	5.38	6.09	16.92	3.66	12.59	5.23	5.88	11.32	10.73	6.7	17.13
E. russatus	MNRJ32815	M	303	152	36	25	97	4		9.45	6.37	5.18	4.96	5.67	6.62	18.09	4.18	13.56	5.51	6.3	12.94	11.56		18.73
E. russatus	MNRJ32816	F						2	27.23	7.28		4.77	4.63	5.77	6.05	15.8	3.22	12.14	5.14	5.89	11.56	8.54	6.89	14.61
E. russatus	MNRJ32817	F	275	145	31	24	58	3	30.25	8.94	7.21	4.8	3.99	5.65	6.15	17.62	4.36	12.63	5.3	6.1	13.07	11.42	7.18	18.47
E. russatus	MNRJ32818	F			31	22		2	28.44	7.81	5.89	4.79	3.71	4.37	5.82	16.33	3.69	11.96	4.85	5.43	11.92	10.8	7.45	16.53
E. russatus	MNRJ32819	M	276	146	35	24	67	3	31.13	9.01	6.63	4.91	3.86	5.8	6.51	17.88	4.3	13.23	5.57	6.02	13.03	11.33	7.44	19.02
E. russatus	MNRJ32820	F	291	146	35	23	57	2	30.93	8.21	6.69	5.13	3.98	5.08	6.27	17.53	4.14	13.1	5.53	6.52	12.9	11.61	7.24	18.23
E. russatus	MNRJ32821	M	287	137	36	24		4	32.1	9.32	6.81	5.22	3.92	5.72	6.38	18.58	4.4	13.13	5.59	6.29	13.52	11.37	7.3	18.44
E. russatus	MNRJ32822	M	333	175	37	25	99	4	32.72	9.63	7.42	4.96	3.9	5.92	6.31	18.33	3.83	13.35	5.44	5.83	13.89	12.24	7.51	19.45
E. russatus	MNRJ32824	M	322	171	36	23		4		10.8	7.78	5.33		5.71	6.61	18.82	4.43	13.03	5.77	7.17	14.14	12.85		20.23
E. russatus	MNRJ32825	F			33	23	71	3	30.95	8.77	6.8	5.28	3.91	5.71	6.43	17.46		12.91	5.46	5.92	12.4	11.25	6.87	17.77
E. russatus	MNRJ32826	M	284	141	34	22		3	31.39	8.71	6.64	5.21	3.96	4.86	6.19	16.68	4.03	12.84	5.71	5.74	13.05	11.32		18.35
E. russatus	MNRJ32827	F	282	150	35	25		3	30.72	8.45	6.71	5.4	4.09	6.05	6.63		4.43		5.44	6.25		11.04		19.92
E. russatus	MNRJ32828							0.5		7.13	5.33	4.88		4.66	5.8		3.13		5.33	4.92	9.44	9.14		14.46
E. russatus	MNRJ32829							2		7.81	5.89			4.67	5.36		2.94		5.37	5.19	10.19	9.97		15.23
E. russatus	MNRJ35891	F	290	139	34	22	60	2	31.04	9.08	6.3	5.12	4.02	5.98	6.35	18.35	4.32	12.79	5.18	6.18	13.03	12	7.53	18.92
E. russatus	MNRJ35892	M	286	145	36	20	83.27	3	31.8	9.27	6.4	5.24	4.31	6.01	6.59	18.12	4.4	13.05	5.58	7.17	13.22	11.99	7.27	19.3
E. russatus	MNRJ5260	M	290	160	35	18	70	4	32.74	9.34	7.29	5.56	4.34	6.38	6.47	18.67	4.61	13.24	5.23	6.9	13.9	11.76	7.26	18.37
E. russatus	MNRJ5281	M	260	125	34	16	60	2	29.23	7.74	6.45	5.11	3.91	5.17	6	17.06	4.15	12.93	5.4	6.41		10.82	7.32	17.58
E. russatus	MNRJ5283	M			35	20	95	3	31.2	9.17	6.57	5.22	4.05	6.09	6.37	17.45	4.21	12.56	5.15	6.2	12.76	12.43	8.03	18.36
E. russatus	MNRJ5287	M			37	18	90	4	33.9	9.62	6.59	5.34	4.34	6.34	6.91	18.11	4.56	12.74	5.56	7.53	14.23	12.49	7.7	19.13
E. russatus	MNRJ5296	M	230	120	30	18	40
E. russatus	MNRJ5302	M						3	31.38	9.03	6.94	5.17	4.22	5.81	6.48	17.31	4.2	12.98	5.51	6.79	13.84	12.05	7.52	17.87
E. russatus	MNRJ5307	M	290	155	36	20	81	3	30.58	8.76	6.61	5.1	4.23	5.41	6.21	17.23	4.26	12.52	5.53	6.21	14.09	11.05		17.54
E. russatus	MNRJ5310	F	284	144	35	16	90	2	29.83	8.29	6.47	5.09	4.13	5.46	5.96	17	4.38	12.55	5.15	6.15	13.01	11.24	7.22	18.13
E. russatus	MNRJ5320	M	285	155	34	20	60	2	29.05	8.15	7.04	5.18	4.2	4.61	6.19	16.7	4.42	13.31	5.94	6.07	13.04	10.8	7.06	17.84
E. russatus	MNRJ5323	M			37	21	70	2	30.72	9.17	6.93	5.09	4.22	6.03	5.98	16.9	4.21	12.8	5.15	6.47	14.05	11.54	7.14	18.33
E. russatus	MNRJ5324	M	303	155	36	17	90	2	30.76	8.92	6.44	5.42	4.05	5.59	6.28	17.85	3.99	12.72	5.56	6.98	13.38	11.58	7.12	19.16
E. russatus	MNRJ5340	M			34	18	110	5	34.4	9.9	7.49	5.42	4.02	6.54	6.69	19.62	4.72	13.65	5.33		14.67	12.95	7.68	19.49
E. russatus	MNRJ5368	F	290	145	34	17	70	2	29.72	8.75	6.26	4.95	4.09	5.5	6.13	16.98	3.95	12.37	5.69	6.25	12.95	11.15	6.91
E. russatus	MNRJ5380	F	310	160	35	20	100	5	31.74	9.24	6.97	5.09	4.65	5.83	6.21	18.58	4.48	12.81	5.59	6.82	13.78	12.45	7.39	18.62
E. russatus	MNRJ5394	F	255	125	32	16	55	2	29.33	8.3	6.14	5.21	4.12	5.32	6.48	16.73	4.08		5.34	5.34	12.46	12.6	7.04	17.8
E. russatus	MNRJ5413	F	280	150	35	18	71	2	30.43	8.61	7.25	5.45	3.99	5.2	6.58	17.75	4.22	12.82	5.54	6.34	13.41	11.45	6.96	18.85
E. russatus	MNRJ5481	M	287	140	38	22	100	3	31.58	9	7.44	5.2	4.33	5.63	6.62	18	4.18	12.82	5.77	6.97	13.8	11.86	7.47	18.77
E. russatus	MNRJ5824	F	305	155	31	18
E. russatus	MNRJ6210	F						4		8.59	7.33	5.52		4.82	6.86		4.29		5.58	6.6				18.15
E. russatus	MNRJ6321	F						4	30.7	8.49	6.52	5.12	4.21	5.31	6.45	16.75	4.55	12.32	5.29	6.23	13.73	11.91	7.15	17.67
E. russatus	MNRJ6322	F						4	31.78		7.55	5.58	3.9	5.26	6.78	17.63	4.7	12.93	5.58	6.61	14.97	11.67	7.31	19.68
E. russatus	MNRJ6462	F	273	131	33	23
E. russatus	MNRJ7070	M	271	133	32	20		3	29.72	8.38	6.01	4.76	4.06	5.53	5.96	17.68	4.01	12.66	5.04	5.76	12.9	10.93	7.65	17.57
E. russatus	MNRJ7071	M	220	110	33	18
E. russatus	MNRJ7073	F	266	140	34	21		2	29.67	8.26	6.52	5.24	4.01	5.32	6.04	17.02	4.02	12.65	5.47	5.47	13.18	10.35	7.49	17.77
E. russatus	MNRJ7074	M	285	139	34	20		2	29.71	8.45	6.39	5.19	4.26	5.32	5.92	16.72	3.67	12.3	5.26	5.32	12.6	11.27	6.9	18.57
E. russatus	MNRJ7091	M			37	21	90	5	32.57	9.99	6.43	5.33	4.41	6.22	6.21	19.13	4.54	13.12	6.19	7.97	15.04	12.66		20.53
E. russatus	MNRJ7327	M	275	132	33	18	60	2	29.19	8.44	6.19	4.75	3.78	5.27	5.93	17.36	3.81	12.44	5.56	6.46	12.52	10.69	7.15	17.47
E. russatus	MNRJ7329	F	251	128	34	19	50	3		7.78	6.62	5.01	3.74	5.3	5.98		3.36		5.4	6.01	11.86	9.83	7.02
E. russatus	MNRJ7331	F	241	121	34	16	48	1	26.63	7.81	5.74	4.93	3.63	5.19	5.57		3.33	12.16	5.41	5.3	11.06	10.39	7.02	16.65
E. russatus	MNRJ7333	M	300	153	39	19	65	2		8.64	6.66	5.08		5.48	6.09		3.49		5.08	6.01	12.72			17.94
E. russatus	MNRJ7334	F	302	147	32	22	100	5		9.13	7.87	5.43	4.04	6.49	6.45		4.41	12.64	5.2	6.18	14.82	12.68		19.52
E. russatus	MNRJ7341	F	307	156	33	20	88	2	31.01	9.16	7.22	5.08		6.05	6.17	18.2	4.07		5.48	6.55	13.41	12	7.17	18.05
E. russatus	MNRJ7346	F	257	128	33	16	56	2	29.68	8.31	7.04	5.08	4	4.73	5.87	16.66	3.82	12.72	5.47	6.39	12.85	10.25	7.22	17.88
E. russatus	MNRJ7350	M	310	168	38	19	57	3	31.94	9.13	6.8	5.25	4.23	6.16	6.4	18.23	4.37	13.42	5.56	6.91	14	11.91	7.65	18.94
E. russatus	MNRJ7353	F	293	158	36	19	65	2	28.92		6.32	4.91	3.6	5.29	6.27	17.03	3.89	12.5	5.73	6.16	13.26	10.26	6.47	18.43
E. russatus	MNRJ7355	M	295	143	37	19	70	2	31.04	8.85	7.05	5.25	3.98	5.85	6.19	17.98	4.27	13.12	5.85	6.22	13.97	12.04	7.52	18.84
E. russatus	MNRJ7356	F			36	19	75	3	31.21	8.53	6.45	5.04	3.79	4.85	6.45	17.77		12.89	5.01	6.89	14.64	11.83	6.96	18.29
E. russatus	MNRJ7358	M	317	168	38	18	110	3	32.42	9.23	6.41	5.13	3.82	6.29	6.08	18.21	4.02	12.86	5.4	6.51	13.46	12.3	7.27	19.85
E. russatus	MNRJ7361	M	298	150	36	16	98	4	30.28	8.97	6.9	4.79	4.21	4.75	5.86	17.74	4.13	12.96	5.81	6.71	13.04	11.91	7.03	19.02
E. russatus	MNRJ7366	M	312	163	37	20	90	3		9.1	7.1	5.22	3.45	5.79	6.21	18.44	4.31	12.87	5.31	5.88	13.33	12.14		18.95
E. russatus	MNRJ7367	F	268	141	36	19	60	2	29.96	8.27	6.12	5.11	3.89	5.93	5.55	16.7	3.94	12.54	5.88	6.26	12.41	10.52	7.26	17.08
E. russatus	MNRJ7371	F	300	150	39	16	95	3	30.24	8.5	6.26	5.27	3.81	5.31	6.3	17.25	4.24	13.32	5.39	6.34	13.7	10.03	7.29	18.74
E. russatus	MNRJ7376	F	238	124	35	18	40	2		7.84	6.06	4.89		5.49	5.89		3.25		5.76	6.28	11.36	10.3	7.16	16.15
E. russatus	MNRJ7378	F	262	136	35	20	65	3		8.24	6.6	5.03	3.77	5.25	6.12	16.22	3.88		5.23	6.42	12.84		7.43	18.33
E. russatus	MNRJ7379	F	245	125	33	18	45	1	26.77	7.3	5.87	5.19	4.1	5.26	6.09	16.56	3.73	12.34	5.54	6.07	11.72	10.14	7.16	15.72
E. russatus	MNRJ7380	M	259	133	33	18	50	1		7.34	6.68	5.1	3.98	5.23	5.84		3.24		5.56	6.18	11.8	10.65		15.95
E. russatus	MNRJ7381	M	257	128	32	19	67	2	27.99	7.83	5.88	4.58	3.67	5.16	5.89	16.97	3.39	12.6	5.7	6.44	12.55	10.15		16.34
E. russatus	MNRJ7382	F	246	129	33	17	48	2	27.38	7.65	5.66	4.98	3.76	5.49	6.01		3.78	12	5.24	5.9	11.54	10.07	7.03	16.98
E. russatus	MNRJ7383	M	263	134	35	17	55	2	27.44	7.55	5.92	4.87	3.87	5.3	5.5	16.09	3.61	12.34	5.11	6.05	12.02	10.29	6.85	16.36
E. russatus	MNRJ7385	F	246	120	34	19	50	1	27.25	7.32	5.59	4.88	4.14	5.41	5.87	15.92	3.63	11.62	5.07	6.36	12.38	10.15	7.22	15.83
E. russatus	MNRJ7386	F			32	16	25	1	26.44	8.1	5.8	4.76	3.73	4.83	5.71	15.31	3.59	12.16	5.25	4.96	11.02	9.23	6.99	15.8
E. russatus	MNRJ7387	F	220	110	29	17	30	1	25.44	7.24	5.1	5.22	3.42	5.41	5.66		3.25	11.93	4.9	5.87	10.46	9.57	6.77	15.76
E. russatus	MNRJ7388	F	251	121	33	19	60	1	27.46	7.35	6.19	5.24	4.46	5.34	5.42	15.74	3.56		5.47	5.79	11.28	10.43	6.63	16.09
E. russatus	MNRJ7414	M	340	185	40	23	95	3	32.41	8.95	7.28	5.01	4.29	5.67	6.04	18.24	4.22	12.98	5.11	6.77	15.44	11.15	7.36	19.3
E. russatus	MNRJ7415	M	290	150	37	19	90	2	30.11	8.45	6.4	5.28	3.4	5.95	6.25	17.64	4.04	12.67	5.57	6.28	12.35	11.21	6.95	18.56
E. russatus	MNRJ7422	M	290	147	41	18	65	1	28.38	8.05	6.2	4.99	3.85	5.68	6.06	16.6	4.1	11.96	5.47	6.58	12.21	10.66	6.71	17
E. russatus	MNRJ7424	F	270	138	35	17	57	1	28.43	7.65	6.07	4.94	4.34	5.59	6.07		3.92		5.57	6.26	12.02	10.54	7.45	17.44
E. russatus	MNRJ7425	F	280	149	35	18	53	1	28.38	7.75	6.43	5.04	3.95	4.82	6.12		3.63	12.71	5.59	5.92	12.05	10.51	6.95	17.32
E. russatus	MNRJ7427	M			33	20	50	1	26.51	7.37	6.08	5.3	4.54	5.08	6.17		2.98		5.89	6.21	11.06	9.88		15.87
E. russatus	MNRJ7429	F	294	157	37	22	100	4		9.03	7.57	5.26	3.54	6.31	6.59	17.07	3.87		5.78	6.71	13.49	12.09		19.01
E. russatus	MNRJ7430	F	283	140	35	19	95	4	29.86	8.59	6.13	4.81	3.9	5.68	6.3	17.98	3.8	11.88	4.95	6.22	13	11.36		17.28
E. russatus	MNRJ7436	F	267	142	34	18	40	1	29.22	8.19	7.13	5.06	3.44	5.23	6.44	17.3	4.38	13.3	5.63	6.11	12.61	10.42	6.61	16.61
E. russatus	MNRJ7441	F	266	140	36	23	60	2	28.61	8.08	6.59	5.24	3.98	5.36	6.28	16.63	3.58	12.67	5.81	5.48	13.08	10.8	6.9	17.9
E. russatus	MNRJ7443	F	263	138	36	20	50	2	27.8	8.33	6.49	4.89	4.45	5.45	6.23	16.53	3.42	12.1	5.74	6.18	12.41	10.73	6.98	18.19
E. russatus	MNRJ7447	M			39	17	100	3	32.76	9.3	7.16	5.36	4.64	5.99	6.37	18.31	4.33	13.29	5.32	5.91	14.02	12.11	7.13	20.18
E. russatus	MNRJ7449	M	245	122	35	20	50	1	27.56	7.5	5.92	5.13	4.02	5.43	6.13	16.76	3.43	12.76	5.83	6.2	11.33	10.44	7.43	16.26
E. russatus	MNRJ7470	M	304	158	36	19	100	4	31.6	9.05	6.57	5.27	4.2	6.59	6.14		4.36	13.27		6.59	14.1	12.23	7.58	18.88
E. russatus	MNRJ7492	F	269	138	35	22	60	3	30.62	9.19	6.81	4.89	3.55	5.57	6.38		3.99	12.77	5.71	6.22	13.77	9.74	6.61	18.44
E. russatus	MNRJ7493	M	250	125	34	16	52	1	27.36	7.51	6.2	4.79	3.89	5.29	5.66	16.63	3.35	12.58	5.58	5.76	11.92	10.38	6.77	17.04
E. russatus	MNRJ7494	F	299	154	35	17		2	30.13	8.73	7.03	5.19	4.27	5.1	6.13	17.43	4.27	12.79	5.42	6.72	14.45	10.8	7.05	19.21
E. russatus	MNRJ7495	M	262	130	33	18	50	2				4.92	3.49					12.56	5.65				7.2	16.4
E. russatus	MNRJ7496	M	277	134	36	18	60	2	29.85	8.25	6.3	5	3.78	5.99	5.88	17.52	3.89	12.68	5.2	6.1	12.52	11.97	7.53	17.82
E. russatus	MNRJ7498	F	282	145	33	18	65	3	30.67	8.86	6.53	4.9	4.03	5.83	6.16	16.93	4.06	12.67	5.32	6.13	12.96	11.24	7.33	17.47
E. russatus	MNRJ7499	F	282	139	36	16	70	3	30.68	8.68	6.38	5.13	3.84	5.68	6.22	18.3	4.3	12.8	5.16	6.43	13.27	11.41	7.31	18.15
E. russatus	MNRJ7501	F	293	150	35	19	75	2	29.43	8.72	6.24	4.86	4.92	6.1	5.74	17.75	3.93	12.59	5.55		13.09	10.65		18.02
E. russatus	MNRJ7503	F	265	131	32	19	50	1	27.83	7.74	6.09	4.93	3.86	5.38	6.18	16.76	3.77	12.31	5.62	6.39	11.7	10.52	6.85	16.66
E. russatus	MNRJ7506	F	240	114	35	20	55	3	30.85	8.69	6.51	4.96		5.71	6.23	17	3.55	12.3	5.56	6.14	13.71	11.47	6.91	18.37
E. russatus	MNRJ7507	M	305	158	38	20	92	3	31.49	9.13	7.13	5.33		6.1	6.58	17.56	4.33	12.48	5.73	6.5	14.17	11.74	7.29	19.49
E. russatus	MNRJ7513	F	259	132	35	20	35	1	28.73	8.39	6.28	4.92	3.93	5.3	5.88	16.56	3.44	12.5	5.16	5.87	12.11	10.94	7.06	17.12
E. russatus	MNRJ7535	F	195	99	28	14	25	0.5	24.12	6.77	5.29	4.98	3.45	4.72	5.57	14.7	3.12	11.48	5.43	5.44	10.05	9.34	6.54	15.48
E. russatus	MNRJ7544	M	253	129	34	18	50	1		7.51	5.76	4.9	3.72	5.73	5.35		3.18		5.78	5.82	11.71	9.67		16.23
E. russatus	MNRJ7549	M	230	120	38	16	45	2		8.58	5.72	4.94		5.11	5.7	15.78	3.3	11.12	5.77	5.65	10.73	10.16		15.8
E. russatus	MNRJ7550	M	257	138	36	21	60	2	29.21	8.68	6.01	4.81	3.57	5.9	6.23	16.84	3.39	12.9	5.21	6.26	12.94	10.42	7.16	17.77
E. russatus	MNRJ8155	F						2	29.95	8.45	6.82	4.86	4.13	5.41	6.15	16.39	3.88	13.2	5.74	6.16	13.42	11.12	7.67	17.89
E. russatus	MNRJ8156	M						3	31.81	8.77	6.88	5.2	4.15	5.22	6.66	18.17		13.58	6.05	6.46	13.83	12.04	7.45
E. russatus	MNRJ8157							5	32.54	9.2	7.94	5.13	3.32	5.07	6.5	18.92	4.91	13.49	5.78	6.82	15.47	11.34		19.88
E. russatus	MNRJ8158	F						2	31.24	8.73	6.92	5.2	4.33	5.38	6.26	17.87	4.36	12.82	5.41	6.21	13.46	11.76	7.54	17.8
E. russatus	MNRJ8215	M						3	35.2	10.05	7.29		4.57		6.45	19.45	4.91	12.78	5.33	7.14	15.37	12.7	7.92	19.04
E. russatus	MNRJ8248	M	296	154	35	21		3	33.73	9.55	6.91	5.41	3.59	6.41	6.39	18.95	4.51	13.44	5.31	7.62	14.69	12.76	7.57	20.04
E. russatus	MNRJ8250	M	290	160	36	19	60
E. russatus	MNRJ8291	F	305	155	32	18	85	3	32.4	9.23	6.58	5.12	4.2	6.13	6.62	17.91	4.79	12.75	5.45	6.77	13.6	11.95	7.13	20.39
E. russatus	MNRJ8421	F						1	30.67	8.66	6.7	5.1	4.14	5.17	6.18		4.44	13.29	5.4	6.52	12.07	11.19	7.52
E. russatus	MNRJ8422	M						3	31.85	9.16	7.53	5.18	3.45	5.19	6.55	18.6	4.85	12.58	5.79	6.41	14.14	11.87	7.69	19.11
E. russatus	MNRJ8423	F						5	32.28	9.18	7.44	5.11	3.71	5.24	6.86	18.32	4.97	13.01	5.25	7.02	14.2	12.18	7.7	19.37
E. russatus	MNRJ8424	F						3	31.58	8.96	6.99	4.98	3.88	5.33	6.49	17.54	4.87	13.08	5.43	6.65	13.82	11.43	7.21	19.61
E. russatus	MNRJ8425	F						4	31.68	8.97	6.64	4.96	3.87	5.86	6.52	18.58	5.01	13.52	5.54	6.59	13.2	12.95	7.66	19.56
E. russatus	MNRJ8886	M	297	166	37	20	57	3	30.03	9.03	5.93	4.73	3.85	5.73	5.62	16.06	3.5	12.41	5.75	6.08	13.73	11.01	7.25	18.31
E. russatus	MNRJ8888	M	257	136	34	19	67	3	27.35	7.55	6.63	5.07	3.9	4.73	5.65	16.2	3.46	12.33	5.8	6.07	11.72	11.05	6.82	17.08
E. russatus	MNRJ8901	M	271	135	35	18	75
E. russatus	MNRJ9003	M	283	149	33	16	70	4	30.47	8.47	6.77	4.86	3.92	4.95	6.06	16.67	4.18	12.76	5.71	6.2	13.22	10.63	7	17.82
E. russatus	MNRJ9007	M	264	140			63
E. russatus	MNRJ9017	M	272	146	36	15	68	2	29.3	8.78	6.5	4.73	3.85	5.66	5.37	15.76	3.89	12.45	5.22	5.71	12.73	12.22	6.98	17.96
E. russatus	MNRJ9018	M	292	157	37	16	71	5	31.15	9.44	6.65	5.1	3.91	6.03	6.84	17.34	4.47	12.11	5.4	7.03	13.37	11.75	7.11	18.34
E. russatus	MNRJ9025	M	253	141	32	18	56		27.21		6.37		4.06	4.77		15.63	3.38	11.76	5.42	5.23	11.66	10.62	6.59	16.81
E. russatus	UFRJ9032	M	306	166	34	17	87	3	31.04		6.68		3.98	6.18			4.21	12.71	5.44	6.84	12.83	12.08	7.16	17.59
E. russatus	MNRJ9077	M	277	143	34	18	92	3	31.58	9.23	7.09	4.93	4	5.36	5.67	17.77	4.44	12.78	5.3	6.43	13.12	12.18	6.69	19.22
E. russatus	MNRJ9093	F	298	158	35	18	94	3	32.2	9.12	7.26	4.95	3.85	5.38	6.09	17.72	4.67	12.36	5.42	6.17	13.76	12.06	7.21	19.89
E. russatus	MNRJ9097	M	281	152	35	15	66
E. russatus	MNRJ9099	F	262	135	32	19	62	5	30.37	8.61	6.99	5.17	3.72	5.51	6.35	17.22	4.35	12.17	5.51	6.1	12.81	11.58	6.82	18.18
E. russatus	MNRJ9102	M		173	35	16	62	2	29.91	8.15	6.73	5.06	3.88	5.39	5.93	16.17	4.02	13.05	6.06	5.77	13.07	10.9	7.05	17.96
E. russatus	MNRJ9104	M			36	17	76	5	32.4	9.57	6.9	5.07	4.01	6.26	6.46		4.67	12.43	5.5	6.66	13.66	12.6	6.95	19.84
E. russatus	MNRJ9105	F	280	146	35	17	81	3	30.37	8.26	6.64	5.01	3.93	5.56	6.31	17.64	4.39	12.67	5.49	6.32	12.69	12.61	7.33	18.56
E. russatus	MNRJ9108	M	259	140	33	17	67	2	28.41	8.1	6.04	4.83	3.67	5.37	5.78	15.85	3.54	11.83	5.49	5.71	12.46	10.48	6.94	17.15
E. russatus	MNRJ9119	M	255	135	33	15	48	3	28.75	8.36	6.56	5.03	3.5	5.53	5.69	15.61	3.98	11.69	5.29	5.45	12.47	11.34	6.52	17.73
E. russatus	MNRJ9184	F	181	96	29	15	21	0.5	23.46	6.76	5.31	3.57	3.61	4.42	5.42		2.65	11.23	5.48	4.97	9.57		6.74	14.8
E. russatus	MNRJ9197	M	289	155	35	16	72	4	31.27	8.74	6.73	5.15	3.88	6.25	6.19		4.23	12.44	5.16	6.14	13.55	11.79	6.71	18.57
E. russatus	MNRJ9206	F	273	150	35	15	66	2	29.03	8.11	5.83	4.96	3.73	5.19		16.07	4.11	11.76	5	6.25	12.64	11.14	7.12	18.09
E. russatus	MNRJ9267	M	277	142	34	17	62	3	29.97	8.54		4.95	3.6	4.7	5.61		4.22	12.22	5.13	6.11	12.76	11.51	6.98	18.92
E. russatus	MNRJ9273	F	307	153	35	17	95	3	32.07	9.09	7.18	5.01	4.05	5.55	6.44	17.92	4.51	12.58	5.64	7.16	13.62	12.17	7.36	19.32
E. russatus	MNRJ9275	F	286	150	32	14	87	3	30.44	8.64	6.78	5.02	4.02	5.81	5.95	16.76	4.04	12.88	5.16	6.17	13.07	11.61	7.12	18.49
E. russatus	MNRJ9278		296	157	35	17	90	3	30.88	8.82	6.84	4.97	3.86	5.41	6.08	17.92	4.43	12.59	5.39	6.33	13.37	11.66	7.06	18.26
E. russatus	UFRJ9283	M	287	153	34	17	84	4	30.91	8.85	6.89	5.14	4.07	5.59	6.38	17.45	4.44	12.27	5.46	6.68	13.47	11.85	7.06	19.08
E. russatus	MNRJ9284	M	273	130	33	18	87
E. russatus	MNRJ9285	M	305	155	35	18	70
E. russatus	MNRJ9288	F	299	155	36	18	50	2	30.36	8.28	6.14	5.19	3.8	5.6	5.96	16.64	4.08	12.47	5.07	6.4	13.1	11.56	6.88	18.27
E. russatus	MNRJ9307	M	275	150		16	66	2	29.14	8.16	6.75	4.85	3.93	5.09	5.93		3.64	12.21	5.62	6.08	12.22	11.37	6.56
E. russatus	MNRJ9312	F	279	140			60	1	28.77	7.69	6.93	5.12	3.49	5.09	5.87	15.83	3.46	11.59	5.81	5.59		11.2	6.62	16.79
E. russatus	MNRJ9328	M	283	149	34	18	72	3	31.64	8.76	7.67	5.08	4.08	5.14	6.19	16.86	4.14	12.84	5.65	6.82	13.4	11.19	7.38	18.86
E. russatus	UFRJ9338	M	275	145	36	18	75	3	30.48	8.66	6.84	4.73	3.69	5.5	5.57	16.98	4.17	11.94	5.15	6.17	12.83	11.4	6.92	18.14
E. russatus	MNRJ9339	M			34	18	59	3	28.27	8.24	6.8	5.01	4.11	4.8	5.96	15.64	3.76	11.89	5.58	5.68	11.9	11.1	6.83	17.57
E. russatus	MNRJ9343	M	269	136	35	15	63	3	28.18	8.31	6.87	4.7	3.38	4.62	5.42	16.24	3.83	11.81	5.37	6.19	12.31	10.69	6.84	17.63
E. russatus	UFRJ9347	M	255	137	35	19	52	2	27.87	7.88	6.07	5.1	3.84	5.11	5.76	15.06	3.29	11.62	5.64	5.43	11.6	10.82	7.59	16.39
E. russatus	UFRJ9350	M	282	149		17	77	3	29.07	8.57	6.78	4.99	3.74	4.97		16.42	3.5	11.63	5.22	6.09	12.34	10.35	7.48	17.14
E. russatus	MNRJ9353	M	296	162	36	16	70	3	29.85	9.07	6.76	4.62		5.72	5.66	15.95	3.81	11.79	5.03	5.81	13.03	11.22	6.76	17.95
E. russatus	MNRJ9355	M	293	161	36	18	71	2	30.57	8.51	7.1	5.13	3.93	5.16	6.14		3.91	12.41	5.28	6.51	13.02	11.83	6.51	18.01
E. russatus	MNRJ9356	M	275	150	32	16	68	3	29.17	8.41	6.15	4.75	4.07	5.8	6.06	16.15	3.89	12.24	5.71	6.15	12.86	11.25	7.18	17.81
E. russatus	MNRJ9358	M	299	153	33	16	75
E. russatus	MNRJ9360	F	270	135	34	17	96	2	30.05	8.66	6.41	5.03		5.57	6.18	15.99	3.84	12.54	5.49	6.19	12.41	11.47	6.88	17.01
E. russatus	MNRJ9381	F	289	152	34	18	96	5	32.43		6.6		4.11	6.28		17.01	4.5	11.96	5.76	6.56	13.72	11.95	6.74	19.72
E. russatus	MNRJ9382	M			36	17	69	2	30.3	9.03	7.09	4.9	3.88	5.59	5.79	16.34	3.83	12.58	5.06	6.39	12.88	11.55	7.22	18.3
E. russatus	MNRJ9385	F	238	125	33	15	48
E. russatus	MNRJ9389	M	261	131	32	18	68	3	31.16	8.65	7.53	5.36	3.88	5.23	6.03	16.37	3.86	12.42	5.19	6.13	12.4	11.54	7.38	18.01
E. russatus	MNRJ9397	F	265	135	34	17	80	3	30.64	8.97	6.67	4.8	3.28	5.46	6.22	17.59	4.55	12.09	5.71	6.54	13.39	11.31	6.96	18.78
E. russatus	MNRJ9404	F	288	157	33	18	83	3	30.08	8.82	6.05		3.48	5.96	6.13	17.62	4.21	12.49	5.85	6.33	12.62	11.39	7.22	18.55
E. russatus	UFRJ9406	M	275	139	32	18	80	1	28.19	7.98	6.37	5.14	3.9	5.25	5.59	16.01	3.88	11.76	5.18	5.24	12.26	11.02	6.36	17.36
E. russatus	MNRJ9424	M			39	21	90	3		8.99		5.06		6.53	6.19		4.24		5.47	6.69	14.81			18.82
E. russatus	UFRJ9432	M	302	167	36	16	80
E. russatus	MNRJ9434	M	276	152	36	18	65	2	29.45	8.68	6.87	5.05	3.82	5.98	5.82	16.43	4.06	11.92	5.29	6.22	12.89	11.03	6.82	18.34
E. russatus	MNRJ9442	M	277	139	33	18	84
E. russatus	MNRJ9443	M	254	132	33	17	50
E. russatus	MNRJ9445	M	289	151	36	16	95
E. russatus	MNRJ9446	F	298	153	36	17	92
E. russatus	MNRJ9447	M	284	144	35	18	99
E. russatus	MNRJ9454	F	261	126	32	20	64
E. russatus	MNRJ9463	M	293	157	36	17	90
E. russatus	MNRJ9467	F	280	143	33	15	77	3	30.25	8.54	6.3	5.37	3.58	5.96	6.27	16.66	4.59	11.57	5.29	5.77	12.74	11.65	6.75
E. russatus	MNRJ9478		266	131	32	18	85
E. russatus	MNRJ9490				35	17	92
E. russatus	UFRJ9497	M	295	157	35	17	103	5	31.07	9.16	6.78	4.86	4.01	5.78	6.39	17.64	4.5	13.13	5.58	6.86	13.24	12	6.92	18.59
E. russatus	MNRJ9499	F	283	157	34	18	55	2	27.98	7.85	5.96	4.88	3.52	5.45	5.58	15.33	3.94	11.77	5.02	5.66	11.68	11	6.38	16.64
E. russatus	MNRJ9500	F	279	148	34	16	72	2	28.52	8.17	6.62	4.91	4.51	5.34	5.92	16.28	3.48	12.25	5.43	6.19	12.36	10.32		17.51
E. russatus	MNRJ9512	M	270	135	33	15	64	1	28.96	8.17	6.28	4.54	3.55	5.42	5.66	15.74	4.23	12.38	5.5	5.91	12.38	10.89	6.91	17.67
E. russatus	MNRJ9514	M	293	159	34	18	73	4	30.53	8.8	6.63	4.88	3.58	5.72	5.87	16.75	4.24	11.91	5.53	6.41	13.98	11.22		18.66
E. russatus	MNRJ9516	M	250	130	31	15	58	3	28.25	7.83	6.57	4.69	3.65	4.88	5.59	16.16	3.47	12.31	5.28	6.06	11.67	11	6.6
E. russatus	MNRJ9520	M	274	144	35	16	64	4	29.47	8.25	5.81	4.73	3.68	5.51	5.84	15.82	3.94	12.01	5.08	5.95	11.87	10.83	6.78	17.64
E. russatus	MNRJ9521	F			33	16	81
E. russatus	MNRJ9525	F	271	143	33	17	62	2	29.4	8.47	6.14	5.14	3.19	5.06	5.9		4.09	11.52	5.32	5.9		11.37	6.76	17.48
E. russatus	MNRJ9528	F	276	141	34	18	85	2	31.32	8.83	6.63	5.22	3.73	6.07	6.3	17.12	3.96	12.7	5.24	6.21	13.3	12	7.29	18.84
E. russatus	MNRJ9530	M	258	140	37	17	52	2	27.92	7.77	5.89	4.92	3.72	5.61	5.32	15.01	3.52	11.75	5.27	5.65	12.39	10.63	6.97	17.25
E. russatus	MNRJ9533	M	291	159	34	18	76	3	29.88	8.34	6.37	5.17	3.93	5.32	6.12	16.39	3.57	12.5	5.69	6.17	12.42	11.26	7.18	17.99
E. russatus	MNRJ9538	F	266	146	34	18	75	3	29.98	8.65	6.6	4.8	3.97	5.49	5.73	16.73	4.43	12.46	5.38	5.89	13.03	11.35	7.15	18.18
E. russatus	MNRJ9539	M	301	159	34	16	76	3	30.25	8.66	6.82	4.81	3.87	5.07	5.41	17.25	4.15	12.54	5.33	6.27	13.02	11.84	6.76	18.61
E. russatus	MNRJ9550	M	272	150	35	17	60	3	30.12	9.03	6.72	4.95	3.84	5.42	5.66	15.93	4.3	12.41	5.27	5.73	12.36	11.23	6.75	17.51
E. russatus	MNRJ9557	M	275	152	34	16	66	2	28.99	7.89	6.15	5.63	3.6	5.02	6.16		3.71	12.45	5.62	5.97	12.06	11.46	6.7	17.4
E. russatus	MNRJ9567	F	230	110	33	18	63	2	28.26	7.92	5.99	5	3.88	5.54	5.55	15.55	3.36	11.88	5.32	5.68	11.99	11.02	6.81	17.24
E. russatus	UFRJ9572	M	305	160	37	18	78	3	31.07	9.09		5.18		5.93	6.13	18.03	4.36	12.56	5.18	6.19	13.06	11.99	6.88	18.69
E. russatus	MNRJ9574	F	257	129	31	18	59
E. russatus	UFRJ9579	M	261	138	34	17	55	2	28.24	8.03	6.27	4.76	3.8	5.08	5.83	16.21	3.19	12.68	5.61	5.77	11.93	9.78	6.68
E. russatus	UFRJ9582	M	293	163	34	19	75
E. russatus	UFRJ9587	M	265	143	34	17	54
E. russatus	MNRJ9591	M	291	151	33	19	91
E. russatus	MNRJ9600	M			31	18	50
E. russatus	MNRJ9622	M	265	132	32	19	75
E. russatus	MNRJ9625	M	286	160	34	16	70	2	30.52	8.7	6.41	5.13	4.32	5.47	5.48	16.31	3.87	12.24	5.34	5.82	12.66	11.46	7.16	18.27
E. russatus	MNRJ9641	F	250	135	34	16	38	1	26.4	7.18	5.66	4.89	3.6	4.41	5.26		3.23	12.18	5.36	5.58	11.24	9.97	7.09	16.51
E. russatus	MNRJ9650	F	220	118	32	17	38	1	25.44	7.02	6.01	4.91	3.55	4.61	5.36	14.4	3.16	11.58	5.36	5.3	10.79	9.88	6.58	16.03
E. russatus	MNRJ9659	M	237	127	32		40	1		7.36	5.63	4.81	3.46	4.87	5.34	14.37	2.96	11.56	5.21	5.17	11.01	10.01		15.44
E. russatus	MNRJ9669	M	274	148	35	15	57	3	28.79	8.37	6.62	4.84	4.04	5.19	5.68	15.97	3.71	12.01	5.17	5.76	12.45	11.22	6.65	17.33
E. russatus	MNRJ9671		245	129	29	19	51	2	26.98	7.46	6.5	4.87	3.91	4.84	5.67	14.86	3.67	11.51	5.47	5.5	11.32	10.66	6.52	17.07
E. russatus	MNRJ9676	F	251	135	31	17	42
E. russatus	MNRJ9971	M	302	149	36	19	90	4		9.7	7.14	4.89		5.77	6.14	18.59	4.48		5.9	6.46	13.73	12.35	7.12	20.64
E. russatus	MPEG22249	M						3	30.95	8.6	6.76	4.9	3.99	5.69	5.95	17.88	4.28	13.32	5.65	6.49	13.17	11.7	7.28	18.41
E. russatus	MPEG23540	M	322	164	35	24	82	3	32.19	9.55	6.56	4.86	4.26	6.23	6.54	17.97	4.65	13.46	6.19	6.56	14.38	12.04	7.38	18.5
E. russatus	MVZ182082	M	288	155	38	24	70	3	32.51	8.98	6.82	5.38	4.27	6.04	6.67	18.44	4.41	13.35	5.42	6.9	13.48	12.12	7.58	19.64
E. russatus	MVZ182085	F			37	23	100	4	34.38	9.58	6.96	5.4	4.14	6.32	6.6	18.42	4.44	13.32	5.97	7.09	14.63	12.65	7.21	20.69
E. russatus	MVZ182798	M	303	155	36	21	90	4	31.97	9.46	6.58	4.85	4.44	5.91	6.4	18.21	4.48	13.08	5.55	7.2	13.79	11.7	7.3	18.48
E. russatus	MVZ182799	M	292	151	36	22	79	2	30.23	8.6	6.87	4.87	3.91	5.28	6.28	17.97	4.02	13.23	5.02	6.67	12.91	11.57	7.03	18.16
E. russatus	MVZ182800	M	280	145	41	22	58	3	30.22	8.59	6.58	5.17	4.21	5.2	6.32	17.34	4.17	13.13	5.19	6.07	12.5	11.62	7.32	18.27
E. russatus	MVZ182801	M	328	175	39		90	3	32.74	9.51	6.83	5.36	4.41	6.38	6.65	18.1	4.74	13.19	5.72	6.58	14.24	12.3	7.49	19.95
E. russatus	MVZ182802	M	303	158	36	22	80	3	32.09	9.32	6.62	5.28	4.06	6.08	6.79	18.82	4.47	13.72	5.57	7.5	13.56	11.94	7.74	19.64
E. russatus	MVZ182803	M	272	142	34	22	62	2	29.46	8.37	6.62	5.31	4.02	5.17	6.11	16.8	3.8	12.84	5.4	6.39	12.61	11.2	7.25	18.2
E. russatus	MVZ182804	M			36	22	70	3	30.14	8.48	6.61	5.06	4.66	5.21	6.51	18.22	4.04	13.19	5.52	6.47	13.18	11.27	7.36	18.89
E. russatus	MVZ182805	M	258	134	39	21	55	1	27.8	7.85	6.26	5.15	4	5.16	5.93	16.61	3.95	12.99	5.19	5.66	11.72	10.91	6.88	17.03
E. russatus	MVZ182807	M	326	172	39	25	99	4	33.22	10.09	7.03	4.99	4.01	6.21	6.44	18.25	4.62	13.11	5.76	7.04	14.1	12.19	7.47	19.4
E. russatus	MVZ182808	F	285	159	36	23	58	2	29.4	8.31	6.41	5.21	4.14	5.55	6.45	17.69	4.28	12.85	5.18	6.53	13.21	10.92	7.26	18.7
E. russatus	MVZ182809	F	265	140	33	23	43	2	28.46	7.91	6.3	5.38	4.17	5.34	6.38	17.1	4.07	12.54	5.24	6.14	12.29	11.1	7.37	17.91
E. russatus	MVZ182810	F			36	24	60	2	30.49	8.54	6.17	5.17	4.33	5.54	6.26	17.8	4.06	13.28	5.16	6.41	13.34	11.15	7.1	18.76
E. russatus	MVZ182811	M	307	157	37	24		2	31.57	8.87	7.09	5.3	4.16	5.8	6.34	18.04	4.58	13.31	5.78	7.01	13.16	11.51	7.76	19.42
E. russatus	MVZ182812	M	325	173	37	26	115	3	34.4	9.65	7.46	5.25	4.79	6.75	6.86	18.74	4.88	13.72	5.92	7.34	14.67	12.36	7.81	20.49
E. russatus	MVZ182813	F	330	177	37	24	90	5	34.6	9.83	7.41	5.44	4.1	6.12	6.52	17.93	4.61	13.1	5.48	6.51	15.04	12.57	8.06	19.95
E. russatus	MVZ182814	M	310	158	36	25	94	3	32.72	9.64	7.22	5.25	4.35	6.15	6.67	18.78	4.78	13.57	5.86	7.44	13.99	11.96	7.58	19.42
E. russatus	MVZ182815	M	325	176	38	23	98	4	33.09	9.87	6.63	5.12	4.17	6.87	6.51	18.66	4.64	13.25	5.6	7.1	13.89	12.52	7.74	19.55
E. russatus	MVZ182816	M	280	153	35	23	56	1	29.19	8.14	6.3	5.34	4.06	5.46	6.34	16.65	3.82	12.62	5.48	6.32	12.3	11.33	7.16	17.6
E. russatus	MVZ182817	F	242	129	35	22	46	1	27.62	7.69	6.36	4.9	3.99	5.08	5.75	15.64	3.52	12.64	5.21	5.77	11.1	10.28	6.73	16.35
E. russatus	MVZ183099	M	321	177	38	25	90	3	32.97	9.79	6.64	5.11	4.05	6.3	6.55	18.61	4.35	13.41	5.82	7.4	14.39	12.44	7.38	19.74
E. russatus	MVZ183100	F		152	37	23	66	3	31.39	9	6.66	5.07	4.13	6.07	6.38	17.99	4.24	13.04	5.37	6.21	13.64	11.69	7.24	18.81
E. russatus	MVZ183101	M	285	153	37	23	83	2	30.52	8.61	6.32	4.94	3.99	5.74	6.32	17.75	4.22	13.62	5.38	6.11	13.01	11.58	7.78	18.34
E. russatus	MVZ183103	M	307	167	41	25	75	2	31.07	8.62	6.25	5.23	4.08	6.04	6.35	17.93	4.11	13.33	5.43	6.66	13.7	11.55	7.64	18.87
E. russatus	MVZ183105	M	305	171	40	25	85	3	32.72	9.51	6.96	5.22	4.25	5.86	6.67	18.51	4.59	13.21	5.31	7.1	14.26	12.06	7.33	19.54
E. russatus	MVZ183106	M	284	139	39	23	86	3	31.75	9.09	6.86	5.12	3.96	6.08	6.31	18.39	4.5	13.27	5.06	6.9		12.13	7.24	18.69
E. russatus	MVZ183107	F	304	163	38	25	70	3	31.39	8.83	6.12	5.23	4.33	6	6.53	18.05	4.28	13.16	5.57	6.73	13.5	11.72	7.83	19.25
E. russatus	MVZ183108	F	307	170	37	25	61	2	30.51	8.63	6.5	5.27	4.57	5.73	6.29	17.46	4.22	13.03	5.57	6.67	12.84	11.06	7.38	18.81
E. russatus	MVZ183109	F	284	148	36	24	67	3	31.46	9.13	6.87	5.11	4.1	5.56	6.92	18.52	4.41	13.1	5.49	6.64	13.68	11.53	7.5	19.17
E. russatus	MVZ183110	F	295	160	36	23	73	2		8.71	6.71	5.18	4.19	5.58	6.08	17.38	3.95	12.8	5.54	6.22	13.13	11.28		18.56
E. russatus	MVZ183111	F	286	160	35	24	61	2	29.52	8.27	6.53	5.02	4.02	5.4	6.3	16.89	4.19	12.67	5.35	6.41	12.6	10.77	7.4	17.12
E. russatus	MVZ183112	M	327	172	39	25	93	3	33.04	9.46	6.63	5.22	4.22	6.4	6.68	17.84	4.95	12.93	5.73	7.13	14.18	12.19	7.35	19.77
E. russatus	MVZ183114	F	340	179	37	26	86	5	32.48	9.54	7.15	5.17	4.36	5.82	6.85	18.68	4.65	12.92	5.27	6.97	13.96	12.16	7.08	19.37
E. russatus	MVZ183116	F	290	156	37	23	57	3	30.69	8.53	6.45	5.36	4.18	5.49	6.74	17.83	4.1	13.36	5.28	6.21	13.23	11.43	7.29	18.62
E. russatus	MVZ183117	F	291	154	37	24	62	3	29.85	8.48	6.76	5.24	3.63	5.66	6.5	17.36	4.38	12.98	5.18	6.6	13.29	11.28	7.03	18.66
E. russatus	MVZ183118	M	311	168	37	23	78	2	30.49	9.03	6.79	5.21	4.03	5.84	6.27	17.33	4.51	13.01	5.63	6.57	12.94	11.13	7.49	18.11
E. russatus	MVZ183119	M	314	173	37	23	77	3	31.89	9.25	6.74	5.18	4.15	5.71	6.53	18.3	4.45	13.29	5.8	7.17	13.67	12.07	7.72	18.73
E. russatus	MVZ183120	M			40	25	99	4	33.16	9.61	6.7	5.52	3.93	6.15	7.18	18.61	4.96	13.39	5.6	7.41	14.49	12.2	7.33	20
E. russatus	MVZ183121	M	327	178	39	25	89	3	31.92	9.16	6.43	5.11	3.95	6.11	6.38	17.91	4.25	13.03	5.71	6.87	13.39	11.73	7.24	19.05
E. russatus	MVZ183122	M				22	72	2	31.1	8.95	6.78	5.12	4.26	5.96	6.16	17.59	4.55	12.79	5.23	6.37	13.41	11.35	7.21	18.66
E. russatus	MVZ183123	M	307	169	37	24	78	3	30.83	9.05	6.47	5.1	3.91	5.94	6.1	17.61	4.32	13.08	5.67	6.24	13.49	11.37		18.57
E. russatus	MVZ183124	M	298	162	35	22	55	3	29.84	8.65	6.36	4.96		5.84	6.23	17.55	4.02	12.98	5.34	6.63	13.03	11.19	7.63	18.1
E. russatus	MZUSP10161							2	29.99	8.61	6.61	5.13	3.34	5.15	6.21	16.74	4.02	12.25	5.56	6.11	12.98	11.44	6.81	18.17
E. russatus	MZUSP10162	M	225	110	30	20		2	28.13	7.72	6.33	5.21		4.94	6.1		3.8	11.92	5.06	5.74	11.38	10.72	7.07	17.92
E. russatus	MZUSP10169	M	290	150	35	21		3	31.02	8.84	6.41	5.16	4.3	5.84	6.3	17.58	4.47	12.89	5.33	6.43	13.48	11.64	7.63	17.78
E. russatus	MZUSP10170	M	290	150	35	21		3	31.15		6.69	5.18		5.58		18.04	4.17	12.84	5.44	6.21	13.34	11.56	7.65	18.43
E. russatus	MZUSP10171	M	264	124	33	18		3	32.12	9.23	6.92	5.14	4.07	6.04	6.32	17.45	4.36	12.41	5.55	6.97	13.59	11.97	7.94	18.85
E. russatus	MZUSP10172	M	300	160	35	26		3	32.31	9.41	7.51	5.52	4.05	6.01	6.66	18.36	4.7	13.2	5.09	6.61	13.99	12.36	7.27	19.09
E. russatus	MZUSP10174	F	230	120	31	20		1	27.36	7.53	6.12	5.15	4.4	4.86	5.76	15.73	3.27	12.54	5.31	5.81	11.44	10.48	7.27	16.62
E. russatus	MZUSP10175	F	207	107	32	19		1	25.24	6.85	5.87	5.37	3.81	4.55	5.71		3.18	12.23	5.37	5.52	10.44	9.48	6.89	15.61
E. russatus	MZUSP10215	M	165	80	25	15		0.5	22.15	6.1	5.35	4.05	4.32	4.16	5.39		2.39	11.93	4.95	4.74		8.69	6.42	15.4
E. russatus	MZUSP1024	F						3	32.02		6.92		4.2	6		18.03	4.29	13.19	5.28	6.81	13.89	11.69	6.63	19.5
E. russatus	MZUSP10372	M	290	145	35	22		2	30.87	9.6	6.3	5.13	4.2	5.79	6.29		3.73	12.43	5.36	6.79	12.43	11.46	7.23	18.52
E. russatus	MZUSP10418	F			32	21		2	28.57	7.99	6.47	5.28	4.06	4.56	6.29		3.8	12.62	5.97	6.14	11.85	10.08	6.73	17.01
E. russatus	MZUSP10422	M	275	145	33	22		2	30.67	8.59	6.92	5.37	3.93	5.21	6.23	17.55	4.05	12.91	5.73	6.17	13.33	11.63	7.57	18.96
E. russatus	MZUSP10612	M	325	169	35	22		4	32.64	9.71	7.12	4.95	4.13	5.8	6.73	17.9	4.63	12.63	5.78	6.95	13.73	12.28	7.03	18.73
E. russatus	MZUSP10677	F	315	172	35	25		3	32.86	9.72	6.83	5.34	4.05	6.1	6.65	18.22	4.83	12.97	5.43	6.63	13.8	12.48	7.4	19.67
E. russatus	MZUSP10678	M	270	142	32	24		3	30.46	8.48	6.84	5.3	4.37	5.82	5.41	17.03	4.21	12.73	5.39	6.36	13.2	11.42	7.36	18.47
E. russatus	MZUSP10679	F	255	120	31	25		2	31.54	9.22	6.7	5		6.36	6.39		4.58	12.66	5.7	6.24	13.1	11.8	7.27	18.7
E. russatus	MZUSP10722	F	280	140	35	27		2	31.31	8.75	7.02	5.06	4.2	5.83	6.42		4.37	13.02	5.27	6.58	13.81	11.28	7.99
E. russatus	MZUSP10724	M	285	150	33	25		2	31.84	8.58	6.7	5.33		5.35	6.62	17.99	4.73	13.06	5.39	6.55	13.89	11.48	7.3	16.76
E. russatus	MZUSP10726	F	242	112	38	25		2	30.76	8.02	6.89	5.31	4.22	5.51	6.3	17.47	4.18	12.98	5.43	6.34	12.97	11.57	7.25	18.28
E. russatus	MZUSP10728	F	285	135	35	20		2	31.54	8.45	7.64	5.3	4.28	5.44	6.08	17.6	4.5	13.02	5.72	6.25	13.54	11.71	6.9	19.05
E. russatus	MZUSP10818	M	295	155	33	24		2	32.29	8.96	7.42	5.27		5.53	6.54		4.2	12.57	5.19	6.66	13.59	11.87		19.02
E. russatus	MZUSP10942	M	305	160	34	25		3	33.21	9.92	7.42	5.46	4.05	5.4	6.744	18.45	4.71	12.89	5.74	7.07	14.14	12.52	7.38	19.25
E. russatus	MZUSP11008	F	193	98	28	18		1		6.3	5.57	4.88		4.13	5.26			11.71	5.43	5	10.04	8.99		15.16
E. russatus	MZUSP11010	F	285	140	32	26		3	32.4	9.18	7.07	5.34		5.64	6.86	18.22	4.64	13.52	5.88	7.14	14.56	11.95	7.29	19.61
E. russatus	MZUSP11013	F	300	150	33	21		3	34.61		7.48	5.63		5.79	6.771	17.9	5.12	12.59	4.93	6.4	14.68	12.26	7.72	20.21
E. russatus	MZUSP11027	M	280	145	34	22		2	30.22	8.37	6.71	4.97		5.25	6.15	17.17	4.28	13.13	5.84	6.3	12.73	11.28	7.25	18.3
E. russatus	MZUSP11028	M	293	147	39	24		2	32.67	9.34	7.08	5.12		6.34	6.91	18.52	4.33	13.78	5.58	7.15	13.55	12.19	7.99	19.3
E. russatus	MZUSP11038	M						3	31.49	8.58	6.89	5.21	4.16	5.66	6.42	18.44	4.34	13.21	5.1	6.49	13.76	11.91	7.21	18.41
E. russatus	MZUSP11161	M						3	31.64	9.06	6.88	5.13	3.75	5.78	6.43	17.97	4.65	12.36	5.49	6.61	13.13	11.77	7.25	18.68
E. russatus	MZUSP11419	F	279	141	30	24		3	31.18	8.99	6.36	5.24	3.98	6.03	5.41		4.46	12.61	5.37	6.24	13.21	11.26	6.86	18.96
E. russatus	MZUSP11431	M	335	165	35	22		2	32.75	9.15	6.86	5.18	4.04	6.46	6.36	18.2	4.41	13.14	5.63	6.79	13.82	12.7	7.13	18.85
E. russatus	MZUSP11441	F	265	140	35	23		2	31.71	9.01	7.12	5.72	4.1	5.56	6.33		4.24	12.98	5.33	5.66	13.15	11.84	7.61	18.33
E. russatus	MZUSP11442	F	265	140	32	24		2	30.17	9.11	6.44	4.94	3.98	5.71	6.54		4.09	12.03	5.46	6.1	12.91	11.66	6.87	18.38
E. russatus	MZUSP1178	M	340	180	33			3		9.6	6.82	5.27		6.52	6.54	18.83	4.92		5.93	7.56	14.29	12.19		19.56
E. russatus	MZUSP13635	M						3	30.96	8.64	6.65	5.06	4.42	6.01	6.77	16.89	4.5	12.38	5.2	6.28	12.8	11.78	7.59	17.79
E. russatus	MZUSP139							2	29.65	8.04	6.76	5.51	4.28	5.54	6.25	16.65	3.59	12.7	5.13	6.04	12.48	11.06	7.28	17.31
E. russatus	MZUSP1791							5	31.94	9.01	7.08	5.54	3.77	5.43	6.78	18.68	4.26	13.34	5.49	7.26	14.04	11.98	7.35	19.06
E. russatus	MZUSP1841	M						2	31.09	8.62	6.65	5.19		5.41	6.24	17.92	4.56	13.31	5.59	6.15	13.78	11.96	7.49	18.16
E. russatus	MZUSP1842	M						3	32.36	8.83	7.14	5.38		5.63	6.65	18.36	4.45	12.86	5.33	6.44	13.87	12.51	7.71	18.18
E. russatus	MZUSP1843	F						4	32.93	9.27	6.97	5.24	4.15	5.58	6.44	17.34	4.6	12.81	5.6	6.32	14.67	12.1	7.74	18.39
E. russatus	MZUSP1844	M						3	29.86	8.05	6.22	5.21	4.44	4.93	6.12	17.01	4.72	13.5	5.21	6.28	13.28	10.33	7.08	17.22
E. russatus	MZUSP1846	F						0.5	23.65	6.29	5.57	5.23	4.15	4.8	5.48		3.05		5.5	5.2	9.96	9.31	7.09	14.08
E. russatus	MZUSP1894	M						3	30.82	8.63	6.67	5.16	4.89	5.1	6.38	17.7	4.15	12.56	6.02	6.08	13.15	11.48	7.62	17.28
E. russatus	MZUSP1895	M						1	26.86	7.42	5.92	5.14	4.16	5.25	5.6	15.3	3.34	12.08	5.43	5.11	11.1	10.07	6.98	15.17
E. russatus	MZUSP1912							1	26.45	7.2	5.62	5.2	4.06	4.69	5.85	15.09	3.44	11.89	5.15	5.55	11.4	9.74	6.59	16.95
E. russatus	MZUSP1969	F						2	32.24	8.79	6.65	5.25	4.6	4.78	6.23		3.65	12.82	5.46	6.39	13.64	11.9	7.21	17.67
E. russatus	MZUSP1970	M						2	32.14	8.7	6.42	5.14	4.32	5.15	6.17	17.24	3.66	12.87	5.87	5.98	13.34	12.17	7.77	17.2
E. russatus	MZUSP1971							5	34.14	9.59	7.38	5.18	4.4	5.92	6.6	17.43	4.22	12.36	5.88	6.26	14.9	12.36	7.7	17.98
E. russatus	MZUSP20186	F	290	152	37	19		2	31.61	9.08	7.08	5.32	4.2	5.55	6.46	17.05	4.24	13.06	5.9	6.23	13.47	11.42	8.01	19.08
E. russatus	MZUSP20540	M						2	31.41	8.42	6.8	5.02	3.64	5.97	6.22	17.95	4.11	13.42	5.35	6.72	13.34	11.89	7.77	18.26
E. russatus	MZUSP20542	F						3		9.83	7.21	5.23		6.25	5.2	17.76	4.88	12.89	5.05	6.47	14.49	12.58		19.33
E. russatus	MZUSP20546	M	307	155	41	20		3	32.46	9.12	7.31	5.55	4.46	6	6.43		4.28	13.16	5.46	6.72		12.1		19.4
E. russatus	MZUSP20547	F	337	165	41	22		3	33.4	9.65	7.49	5.29	4.37	5.84	6.36	16.34	4	12.99	5.36	6.43	14.19	11.7	7.4	19.55
E. russatus	MZUSP20548	M						2	31.63	9.16	7.27	5.3		5.72	6.22		4.17	12.76	5.92	5.66	13.1	11.67	7.3	18.51
E. russatus	MZUSP20549	F	322	170	34	21		3		9.61	7.48	5.22		5.99	6.54	17.04	4.53	13.37	5.38	6.44	14.53	12.32		19.75
E. russatus	MZUSP20550	M	212	102	31	17		0.5		6.92		5.24		3.81	5.39			11.34	5.5	4.85	9.68
E. russatus	MZUSP20551	F	340	168	37	23		3	32.16	9.87	7.69	5.34		6.29	6.92	16.13	3.99	12.6	5.8	7.16	14.64	11.78	8.16	19.91
E. russatus	MZUSP20552	M	202	102	33	16		0.5		6.65		4.29		4.42	5.69		2.44	11.25	5.39					14.57
E. russatus	MZUSP20553	F						3		10	7.65	5.38		6.11	6.7			13.16	6.11	6.68		12.03		19.81
E. russatus	MZUSP20554	F	210	110	30	14		0.5		7.02		5.36		4.78	5.59		2.71		5.61	5.35	10.75	9.9		15.78
E. russatus	MZUSP20555	F	280	150	40	20		2	30.56	8.32	6.83	5.51	4.32	5.33	6.2		4.04	13.05	5.69	5.86	12.48	11.44	7.37	17.83
E. russatus	MZUSP20556	F	259	132	33	23		1	28.88	8.19		5.2		5.33	5.79		3.48	12.15	5.24	5.47	11.26	10.75	7.24	17.42
E. russatus	MZUSP20557	M	368	185				4	35.23	10.53	7.55	5.39		6.29	6.98	17.44	4.49	13.05	5.99	7.34	15.13	12.87	7.79	20.92
E. russatus	MZUSP20558	M	260	140	40	20		2	29.08	8.18	6.78	5.41	4.12	5.22	6.24	16.07	3.81	12.84	5.48	6.04	12.07	10.75	7.59	17.5
E. russatus	MZUSP20559	M	300	155	37	19		2	32.15	9.1	6.86	5.13	4.07	5.29	6.42	17.03	4.14	13.09	6.03	6.54	13.81	11.84	7.54	18.63
E. russatus	MZUSP20560	M	273	143	37	19		2	30.12	8.34	6.98	5.17	4.13	5.52	6.1	16.45	3.8	12.63	5.56	6.23	12.39	11.09	7.48	17.98
E. russatus	MZUSP20561	M	220	120	30	20		1	26.49	7.4	6.14	5.23	4.15	4.85	5.96		3.01	12.02	5.48		11		7.39	16.04
E. russatus	MZUSP20563	F						2	30.12	8.23	6.28	5.36	4.11	5.45	6.16	16.41	3.83	12.46	5.03	6.11	12.76	10.95	7.37	18.08
E. russatus	MZUSP20564	M	297	145	40	23		2	32.9	9.29	7.05	5.2		5.97	6.42	17.86	4.55	13.06	5.61	6.72		12.29	7.83
E. russatus	MZUSP20571	F	287	145	35	21	80	3	30.13	8.34	6.23	5.14	4.85	5.8		17.55	4.08	13.19	5.45	6.18	13.18	10.7	7.13	17.52
E. russatus	MZUSP2091							4	33.7	9.63	7.64	5.36	4.07	6.12	6.9	18.19	4.32	13.44	5.83	7.03	14.06	12.63	8.13	19.22
E. russatus	MZUSP2092							4	33.59	10.03	6.98	5.29	4.18	6.29	6.9	18.69	4.38	13.67	5.54	6.55	14.1	12.62	7.85	20.22
E. russatus	MZUSP2093	M						3	33.5	9.51	7.42	5.45	4.06	6.15	6.83		4.71	13.35	6.06	6.59	14.57	12.35	7.97	19.2
E. russatus	MZUSP21117	M						1	27.23	7.47	6.56	5.14	4.21	4.74		15.95	3.64	12.8	5.18	5.79	11.43	10.48	7.05	16.92
E. russatus	MZUSP2147							5		10.11	7.76	5.48		6.11		18.72	4.8		5.83	6.72	13.85	12.33	8.36	19.96
E. russatus	MZUSP21883	F	259	120	36	17		2	30.74	8.8	6.52	5.08		5.59	6.38	17.89	4.24	12.91	5.25	6.43	13.38	11.43	7.12
E. russatus	MZUSP22513							2	31.09	8.65	6.74	5.22	3.82	6.01	6.42	17.73	3.97	13.08	5.45	6.11	12.96	11.61	7.51	18.15
E. russatus	MZUSP22807	M		155	35	17		2	31.27	9.05	7.04	5.12	4.04	5.78	6.62	18.2	4.63	13.28	5.39	6.23		11.96	7.55	18.58
E. russatus	MZUSP23935							1	27.99	7.79	6.16	5.13		5.36	6.02	16.1		12.63	5.31	5.7	11.19	10.28	7	16.83
E. russatus	MZUSP23936	F						1	26.64	7.22	6.47	5.29		4.35	6.11	14.82	3.54		4.88	5.26	11.03	9.66	6.94	16.28
E. russatus	MZUSP23937							2	31.34	8.92	7.22	5.21	4.23	5.22	6.34	17.9	4.72	12.77	5.47	6.69	13.27	11.18	6.83	18.71
E. russatus	MZUSP23950		310	165	35	24		4	33.09	9.41	7.52	5.1	4.38	5.58	6.55	18.81	4.77	12.96	5.49	6.95		12.52	7.46	19.76
E. russatus	MZUSP23951	F	279	133	35			3	31.64	9.44	7.33	5.17	4.19	5.42	6.51	17.74	4.81	13.04	5.35	6.56	13.5	11.71	7.51	18.8
E. russatus	MZUSP23955							3	30.3	8.73	6.68	5.14	4.24	5.25	6.62	17.66	4.26	13.19	5.43	6.54		11.14	7.15	18.64
E. russatus	MZUSP23956							3	29.87	8.49	6.2	5.04	4.15	5.45	6.69	17.67	4.62	13.04	5.42	6.24	12.55	11.86	6.83	18.25
E. russatus	MZUSP23957							2	30.27	8.36	6.73	5.12	4.25	5.58	6.27	17.57	4.82	12.81	5.22	6.33	12.57		7.05	18.35
E. russatus	MZUSP25400							3		8.42	5.93	4.76	3.63	5.38	6.56		4.34	11.08	4.81	5.73		11.12		16.87
E. russatus	MZUSP25676	M	293	153	35	23		2	31.68	8.99	7.13	5.34	4.36	5.67	6.48	18.03	4.45	13.05	5.63	6.59	13.23	12.16	7.56	19.3
E. russatus	MZUSP25681	F						1	27.47	7.7	6.41	5.09	3.56	5.01	5.25	13.92	3.53	11.44	4.76	5.73	10.92	10.56	7.16	16.58
E. russatus	MZUSP25692	M	284	161	39	22		3	32.53	9.46	6.65	5.24	4.49	6.35	6.53	17.65	4.73	13.33	5.32	7.22	13.99	12.13	7.53	19.38
E. russatus	MZUSP26773	F	260	125	30	16		2	31.07	8.98	6.8	5.14	3.57	5.77	6.38	18.02	4.53	12.99	5.65	6.73	13.63	11.56	7.74	18.55
E. russatus	MZUSP27277	F	256	133	31	22	51	2	28.84		6.23			5.14		17.23	4.22	12.72	5.39	5.99	12.32	11.12	7.3	18.07
E. russatus	MZUSP27278	M	242	134	31	22	48	2	30.15	8.73	6.55	5.12	3.95	5.63	6.06	17.05	4.09	12.55	5.2	6.19	12.44	11.6	7.42	18.1
E. russatus	MZUSP27279	M			34	23	100	4	33.91	9.75	7.52	5.2266	4.25	6.31	7.12	19.57	4.82	13.62	5.79	7.32	14.5	12.82	8.14	20.48
E. russatus	MZUSP27280	M	293	150	34	23	115	2	32.9	9.74	7.04	5.17	4.42	5.45	6.665	18.22	4.73	13.54	5.83	6.83	13.78	12.27	7.91	19.94
E. russatus	MZUSP27281	M	288	153	36	23	70	2	30.09	8.25	6.64	5.44	4.34	5.59	6.22	17.33	3.91	13.13	5.57	6.3	12.84	11.5	7.27	18.36
E. russatus	MZUSP27282	F	296	150	33	23	76	4	32.72	9.34	7.09	5.31	4.32	5.79	6.73	18.2	4.24	13.17	5.48	6.58	14.26	12.6	7.21	18.16
E. russatus	MZUSP27283	M	320	165	34	25	110	3	32.85	9.45	6.76	5.27	3.94	6.31	6.551	18.09	4.41	13.65	5.97	7.32	14.41	12.33	7.49	20.13
E. russatus	MZUSP27284	F	301	165	33	23	72	2	32.333	9.12	7.36	5.33	4.36	6.22	6.34	18.18	4.35	12.668	5.44	6.61	13.93	11.9	7.26	19.03
E. russatus	MZUSP27285	M	285	147	34	22	70	2	31.19	8.5	6.48	5.29	4.16	5.9	6.38	18.06	3.98	12.93	5.35	6.87	13.79	11.61	6.97	18.98
E. russatus	MZUSP27286	M	327	175	36	22	98	3		9.33	6.46	5.09		5.97	6.51	18.17	4.66		5.94	7.2	14.75	12.44		19.57
E. russatus	MZUSP27469	M			32	23		2	28.31	8.01	6.7	5.2	3.73	5.1	6.19	16.24	3.55	12.29	5.19	5.33		11.18	6.68	17.24
E. russatus	MZUSP28356	M		154	37	23	95	3	33.19	9.35	7.12	5.51	4.37	6.15	6.43	18.12	4.57	13.52	5.65	7.37	13.98	12.35	7.65	19.23
E. russatus	MZUSP28369	M	294	157	33	22	72	3	30.91	9.01	6.97	5.19	4.07	6.21	6.33	17.27	4.44	12.5	5.38	5.87	13.07	12.06	7.21	18.67
E. russatus	MZUSP28372	F	262	135	35	23	56	2	29.46	8.15	6.46	5.25	4.61	5.59	6.05	16.65	3.86	12.73	5.58	6.07	12.18	11.25	7.44	17.28
E. russatus	MZUSP28373	M	298	158	36	24	84	3	32.78	9.28	7	5.34	4.23	6.1	6.63	17.89	4.92	13.41	5.75	7.26	14.12	11.96	7.62	19.14
E. russatus	MZUSP28374	F	237	123	38	22	36	1	27.75	7.99	6.24	5.06	4.04	5.37	6.11	16.56	3.69	12.92	5.04	5.6	11.91	10.94	7.38	17.1
E. russatus	MZUSP28375	M	289	150	35	26	65	2	31.11	8.86	6.86	5.16	4.2	5.81	6.25	17.02	3.99	12.79	5.43	6.36	13.35	11.73	7.56	18.38
E. russatus	MZUSP28376	F	281	142	34	25	65	3	30	8.68	6.65	5.31	4.17	5.53	6.11	16.75	3.75	12.35	5.17	6.24	13.22	11.43	6.93	18.05
E. russatus	MZUSP28377	M	318	160	38	26	110	3	33.65	9.64	6.58	5.15	4.2	6.24	6.7	18.82	4.6	13.08	5.73	7.14	14.51	12.74	7.72	19.85
E. russatus	MZUSP28382	M	199	105	29	20	28.5	1	25.09	6.91	5.68	5.18	3.85	4.58	5.77	14.43	3.25	11.44	5.12	5.02	10.09	9.82	6.68	15.19
E. russatus	MZUSP28383	F	239	123	32	23	47	1	27.58	7.69	6.3	4.97	4.24	5.11	5.79	15.61	3.77	12.25	5.34	5.85	11.44	10.38	6.98	16.29
E. russatus	MZUSP28384	M	314	157	35	25	100	4	33.7	9.83	6.79	5.31	3.96	6.44	6.77	19.4	4.64	13.72	5.3	6.92	14.14	12.62	7.79	20.26
E. russatus	MZUSP28385	F	257	132	32	22	64	2	29.17	8.34	6.7	5.06	4.05	5.62	5.85	16.57	4.23	12.5	5.51	5.77	12.52	10.72	7.26	17.47
E. russatus	MZUSP28387	M	194	104	28	20	26.5	1	24.87	6.78	5.36	5.01	4.18	4.66	5.48	13.51	2.77	11.53	5.01	4.77	9.85	9.64	6.82	14.84
E. russatus	MZUSP28389	F	263	138	34	23	85	2	30.03	8.54	6.54	5.21	3.97	5.59	5.93	16.51	3.75	12.48	5.39	6.04	12.5	10.88	7.46	17.76
E. russatus	MZUSP28390	M	298	148	34	23	53	3	32.45	9.22	6.54	5.34	4.38	6.12	6.25	17.97	4.7	12.85	5.45	6.45	13.65	12.22	7.79	18.97
E. russatus	MZUSP28391	M	234	116	30	21	44	2	27.27	7.46	6.24	5.17	3.76	5.09	5.56	15.05	3.56	12.36	5.35	5.89	11.5	10.35	6.96	16.12
E. russatus	MZUSP28392	F	281	139	33	25	85	3	32.42	9.44	6.76	5.33	4.03	6.12	6.4	17.92	4.56	12.95	5.47	6.47	13.9	12.23	7.89	20.11
E. russatus	MZUSP28393	M	244	124	33	22	52	2	29.09	8.14	6.2	5.04	3.9	5.89	5.99	16.41	3.58	12.7	5.29	6.03	12.12	10.84	7.52	16.67
E. russatus	MZUSP28397	M						2	30.04	8.42	6.74	5.32	4.2	5.68	6.05		3.79	12.71	5.63	6.07	12.67	11.46	7.37	17.84
E. russatus	MZUSP3205	F						3	32.79	9.11	7.4	5.28	4.16	5.61	6.48	17.83	4.61	13.3	5.84	6.28	14.25	11.74	8.04	19.17
E. russatus	MZUSP3206	M						3	32.5	9.68	7.29	5.12	4.27	5.82	6.51	17.32	4.32	13.02	5.59	6.35	13.92	12.01	7.58	18.84
E. russatus	MZUSP574	M						2	30.3	8.56	6.78	4.95	4.37	5.29	6	17.28	4.27	12.97	5.43	6.22	12.85	11.43	7.38	18.55
E. russatus	MZUSP586							3	34.12	10.21	7	5.45	4.15	6.21	7.02	19.45	4.82	13.71	5.93	7.66	14.59	12.12	7.91	20.14
E. russatus	MZUSP59							3		10.33	7.35			6.14	6.26				5.48	6.09	13.54
E. russatus	MZUSP6160	M						4	33.46	9.69	6.32	4.97	4	6.27	6.57		4.76	13.15	5.72	7.33	14.48	12.3	7.61	19.3
E. russatus	MZUSP8203	F	277	132	34	19		2	31.39	8.85	6.58	5.31	4.11	5.99	6.21	17.56	4.18	13.09	5.47	6.67	13.18	11.25	7.99	19.59
E. russatus	MZUSP8204	F			36	21	86	2	31.52	8.78	6.89	5.31		5.64	6.1	17.62	3.94	12.99	5.33	6.28	13.28	11.36	7.81	18.46
E. russatus	MZUSP8206	M	287	134	34	21	80	2		9.04	6.68	5.47		6.37	6.15		3.81		5.22	6.23	13.35	11.85		18.34
E. russatus	MZUSP8208	F						2	30.12	8.49	6.27	5.28	3.95	6.08	6.02	17.35	3.79	12.76	5.73	6.39	12.61	11.33	7.31	18.49
E. russatus	MZUSP8209	M			39	22	103	2	33.24	9.46	7.06	5.4		6.15	6.14		4.71	13.41	5.88	6.76	14.21	12.17	7.64	20.03
E. russatus	MZUSP8210	M	273	128	35	23		2	30.77	8.7	6.64	5.37		5.83	6.13	17.13	3.54	13.07	5.6	6.01	12.91	11.21	7.68	18.23
E. russatus	MZUSP853	M						2	30.41	8.74	6.3	5.15	4.32	5.75	6.41	17.56	3.88	13.63	5.82	6.44	12.81	11.29	7.76	19.21
E. russatus	MZUSP854	M						2	28.78	7.95	6.06	5.13	4.34	5.36	6.22	16.11	3.66	13.18	5.29	5.96	11.96	11.01	7.46	17.81
E. russatus	MZUSP8859	M	260	143		21		2	30.39	8.95	6.55	5.12	4.18	5.52	6.1	16.79	4.03	13.05	5.55	6.1	12.54	11.16	7.7	18.05
E. russatus	MZUSP9581	F	260	135	32	18		2	30.5	8.48	6.4	5.04	4.14	5.87	6.29		3.85	12.43	5	6.25	12.55	11.67	7.41	18.1
E. russatus	MZUSP9744	M	282	140	34	23		3	31.22	8.76	7.72	5.27		5.39	6.3	18.06	4.34	13.03	5.5	6.14	12.78	11.89	7.28	18.63
E. russatus	MZUSP9834	F	287	152	35	22		2	30.49	8.43	6.25	5.04	4.1	5.71	6.21	17.28	3.72	12.43	5.6	5.93	13.03	11.64	7.34	17.87
E. russatus	MZUSP9845	F	310	160	35	25		5		9.18	6.94	5.51		5.85	7	19.27	4.63	13.39	5.2	6.53	14.22	12.36		20.46
E. russatus	MZUSP9861	M	295	160	35	23		2	31.38	9.05	7.34	5.04		5.79	6.82		4.43	12.56	5.48	6.54	14.12	12.09	7.17	19.1
E. russatus	MZUSP9878	F	126		36	21		4		9.42	6.84	5.25		5.97	6.32		4.42		5.9	5.95	13.52	11.81		18.42
E. russatus	MNRJ-M492	F	268	143	34	20
E. russatus	UFPR-P276	F	246.4	114.6	35.5		52	3	29.33	8	6.21	5.18	4.18	5.41	6.14	16.98	4.19	12.59	5.38	6.01	12.38	11.02	6.78	18.08
E. russatus	UFPR-P667	F	257	141.5	36	18	50	4	31.47	9.02	6.56	5.25	4.18	6.1	6.53	17.94	4.51	12.89	5.67	6.53	13.84	11.46	7.42	18.98
E. russatus	UFPR-P703	M	288.6	152.8	36	19.8	73	2	30.64	8.79	6.6	5.07	3.92	5.31	6.32	17.87	4.18	13	5.91	6.66	13.66	11.12	7.34	18.11
E. russatus	UFPR-P753	M	294.3	163.4	36.7	21.4	80	3	32.11	8.7	6.93	5.23	4.37	5.87	6.57	18.61	4.46	13.03	5.09	6.79	13.89	11.72	7.25	19.66
E. russatus	UFPR-P759	F	289.2	153.2	34.7	18	50	3	31.69	8.71	6.67	5.15	4.23	5.38	6.43	18.44	4.61	13.36	5.59	6.45	13.92	11.27	7.36	18.84
E. russatus	UFPR-P767	M	274.7	141.5	35.4	22.1	59
E. russatus	UFPR-P770	F	275.8	130.7	32.3	22.2	83
E. russatus	UFPR-P772	M	288.6	160.2	36.7	21.2	80
E. russatus	UFPR-P774	M			35.6	22.1	66
E. russatus	UFPR-P803	F	258.8	143.1	35.1	19	49	2	29.4	8.41	6.19	5.16	3.9	5.55	6.05	16.7	3.75	12.31	5.4	6.12	12.71	10.79	6.69	18.11
E. russatus	UFPR-P804	M	307.7	162.1	34.3	18.3	71.5	3	31.75	9.04	6.93	5	4.1	5.98	6.36	18.55	4.48	12.87	5.53	7.36	13.81	11.72	7.51	18.7
E. russatus	TX60660		250	115	32	20	61.2
E. russatus	UFPB1134	M	304	169	37	22		3	31.88	9.16	6.54	5.12		5.83	6.51	18	4.38	13.58	5.58	6.63	13.81	12.39	7.51	18.95
E. russatus	UFPB1135	F	281	145	36	24		3	30.78	8.84	6.6	5.07	4.13	5.31	6.68	17.61	4.08	12.78	5.12	6.29	13.02	11.94	7.07	18.37
E. russatus	UFPB1136	M	310	158	36	22		4	32.03	8.73	6.17	4.95	3.43	5.94	6.67	18.44	4.59	12.75	4.97	6.71	14.04	11.64	7.44	19.48
E. russatus	UFPB1137	M	302	156	37	22		3	32.21	9.54	6.64	4.93	4.13	5.35	6.6	18.62	4.66	12.77	5.5	6.74	15.07	11.5	7.03
E. russatus	UFPB1138	M	295	150	36	23		4	31.07	9.24	6.74	5.1	4.25	5.68			4.44		5.69	6.8	13.42		7.06	19.33
E. russatus	UFPB1139	F	272	137	34	23		2	29.37	8.03	6.7	5.27		5.54	6.07	16.59	4.08	12.22	4.94	5.85	12.67	11.15		18.16
E. russatus	UFPB1140	F	262	136	34	23		1	29.05	8.07	6.84	5.19	3.96	5.29	6.2	16.33	3.89	12.45	5.51	5.83	12.42	11.08	7.24	17.43
E. russatus	UFPB368	M	320	171	39	23	73	2	31.7	9.02	6.91	5.23	3.68	5.94	6.12	17.58	4.24	13.08	5.76	6.49	13.43	11.97	7.46	18.93
E. russatus	UFPB369	F	279	153	38	23	63	2	29.7	8.27	6.46	5.48	4.13	6.12	6.19	17.46	4.1	13.22	5.24	5.78	12.83	11.36	7.42	19.08
E. russatus	UFPB370	F			33	22	60	2	29.43	8.08	5.98	4.92	3.61	5.94	6.2	16.82	4.01	12.57	5.15	5.32	12.4	11.63	6.81	17.72
E. russatus	UFPB371	M	303	161	37	21	76	2	30.49	8.42	6.5	5.19	3.72	6.25	6.02	18.13	4.26	12.53	5.61	6.49	12.94	11.58	6.89	18.43
E. russatus	UFPB373	M	293	154	37	22	63	2	30.38	8.83	5.96	4.95	3.7	5.69	6.14	17.07	4.11	12.92	5.41	6.04	13.37	11.74	7.12	18.41
E. russatus	UFPB374	F	303	160	35	22	63	2	30.12	8.56	6.23	5.09	4.05	6.1	6.11	17.32	4.39	12.42	5.43	6.44	13.37	11.1	7.22	18.34
E. russatus	UFPB375	M	264	140	34	21	51
E. russatus	UFPB376	F	278	145	35	22	59	2	29.91	8.26	6.31	5.18	3.6	5.4	6.33	17.4	4.41	12.75	5.28	5.72	12.83	11.72	7.16	17.66
E. russatus	UFPB377	M	274	145	36	22		2	30.7	8.72	6.12	5.21	4.15	5.77	6.24	17.12	4.1	12.95	5.8	5.97	13.21	11.74	7.27	18.68
E. russatus	UFPB385	M	299	161	37	23	62	2	30.63	9.24	6.34	5.07	4.11	6.03	6.06	16.88	3.67	12.54	5.24	5.49	13.45	11.55	7.61	18.32
E. russatus	UFPB431	M	292	148	32	22	78	3	31.38	8.86	6.5	4.78	3.76	5.65	5.59	17.07	3.93	12.96	5.46	7.02	13.06	12.01	7.46	18.26
E. russatus	UFPB432		290	148	33	22	78	3	31.17	9.06	7.05	4.79	3.5	5.68	5.92	18.33	4.8	12.9	5.07	6.32	13.85	12.16	7.15	18.79
E. russatus	UFPB433	M	203	104	30	17	27.5	0.5			5.45			4.37			2.87		5.15	5.45	9.73		6.93	15.29
E. russatus	UFPB434	F	204	106	30	18	28	0.5			5.81			4.33			2.87		5.15	5.45	9.73			15.29
E. russatus	UFSC511	M	292	155	35.5	24.5		3	31.59	8.85	6.78	5.21		5.61	6.34	17.24	4.33	12.87	5.75	6.63	13.48	11.454	7.7	19.08
E. russatus	UFSC512	M	252	137	35.5	25		2	29.71	8.32	6.23	5.35	4.23	5.63	6.19	16.66	4.25	13.06	5.92	6.24	12.84	11.04	7.33	17.9
E. russatus	UFSC513	M	295	150	38	24.5		2	31.64	8.86	6.57	5.1	4.25	6.1	6.35	16.78	4.18	12.7	5.48	6.33	13.4	11.13	7.42	18.18
E. russatus	UFSC514	F	314	162	35.5	24.5		3	32.52	9.01	6.24	5.17	4.13	6.02	6.52	18.2	4.456	13.04	5.72	6.88	14.46	11.7	7.29	18.92
E. russatus	UFSC515	F	296	153	35	25.5		2	32.18	9.21	7.04	5.32	4.22	5.91	6.02	17.45	4.49	12.95	5.41	6.91		11.82	7.11	19.45
E. russatus	UFSC516		263	141	35.5	25.5		2	29.68	8.39	6.17	5.12	4.18	5.78	5.86		4.19	12.39	5.65	6.33	12.8	10.94	7.26	17.88
E. russatus	UFSC713	M	280	151	37	25	50	3	29.62	8.66	6.05	4.94	4.3	5.97	6.25	16.78	3.7	13.05	5.58	6.16	12.62	10.99	7.44	17.64
E. russatus	UFSC714	M	305	157	37.5	25	85	4	32.39	9.22	6.4	4.92	4.3	6.23	6.23	17.4	4.26	12.98	5.71	6.78	13.54	12.06	7.25	18.98
E. russatus	UFSC717	M	305	161	26	35.2	64	3	31.52	8.8	6.42	5.3	4.15	5.88	6.6	18.2	4.23	13.36	5.89	6.43	13.6	11.5	7.55	19.42
E. russatus	UFSC719	F	291	156	37	25	54	3	31.82	8.75	6.22	5.32	4.09	5.74	6.52	18.57	4.17	13.08	5.65	6.43	13.99	11.59	7.55	19.13
E. russatus	UFSC720	F	278	147	35.5	23		3	31.69	9.03	6.13	5.24	4.44	6.18	6.37	17.65	4.36	13.33	5.57	6.49	13.59	11.82	6.8	18.21
E. russatus	UFSC729	M	315	167	36.5	25.5	70	4	32.88	9.43	6.5	5.13	4.25	5.71	6.45	18.2	4.68	13.63	6.19	7.15	14.26	11.82	7.33	19.55
E. russatus	UFPB-ZVEC65							3	28.23	7.98	6.46	5	3.66	5.37	6.01		3.89	12.03	5.51	5.95	12.35	10.78	6.54	16.93
E. russatus	UFPB-ZVEC66							4	32.55	9.46	6.84	5.55	4.33	5.91	6.72	17.71	4.66	13.05	5.76	6.72	13.84	11.95	7.67	19.25
E. russatus	UFPB-ZVEC75							1	26.11	7.45	5.67	5.05	4	4.62	5.86	15.63	3.12	12.19	5.3	5.85	10.92	9.92	7.2	16.38

## Sheet: Collections
Colection (Acronym)
American Museum of Natural History, New York, USA (AMNH)
Colección Elio Massoia, Ciudad Autónoma de Buenos Aires, Argentina (CEM)
Colección Julio Contreras, Corrientes, Argentina (CJC)
Fundación Miguel Lillo, Tucumán, Argentina (CML), Louisiana State University Museum of Zoology, Baton Rouge, Louisiana, USA (LSUMZ)
Museo Argentino de Ciencias Naturales “Bernardino Rivadavia”, Ciudad Autónoma de Buenos Aires, Argentina (MACN-Ma)
Museu de Biologia Mello Leitão, Santa Teresa, Brasil (MBML), Museu de História Natural Capão da Imbuía, Curitiba, Brasil (MHNCI)
Museu Nacional do Rio de Janeiro, Universidade Federal do Rio de Janeiro, Rio de Janeiro, Brasil (MN)
Museu Paraense Emílio Goeldi, Belém, Brasil (MPEG)
Museum of Southwestern Biology, University of New Mexico, New Mexico, USA (MSB)
Museum of Vertebrate Zoology, University of California, Berkeley, CA, Estados Unidos (MVZ)
Museu de Zoologia da Universidade de São Paulo, São Paulo, Brazil (MZUSP)
The Museum, Texas Tech. University, Lubbock, TX, Estados Unidos (TTU)
Laboratório de Mastozoologia da Universidade Federal de Minas Gerais, Belo Horizonte, Brasil (UFMG)
Laboratório de Mastozoologia da Universidade Federal da Paraíba, João Pessoa, Brasil (UFPB)
Laboratório de Citogenética de Mamíferos da Universidade Federal do Paraná, Curitiba, Brasil (UFPR)
Laboratório de Mastozoologia da Universidade Federal de Santa Catarina, Florianópolis, Brasil (UFSC).
